# Supplementary material for: Organocatalyzed trifunctionalization of alkynyl 1,2-diones for the concise synthesis of acyloxy allylidene malonates and γ-alkylidenebutenolides
Source: Royal Society of Chemistry journal article supplement (doi:10.1039/d2gc00061j), 2022-01-01
Supplement: d2gc00061j1.pdf [file d2gc00061j1.pdf]

## Organocatalyzed Trifunctionalization of Alkynyl 1,2-Diones for the Concise Synthesis of Acyloxy Allylidene Malonates and $\gamma$ -Alkylidenebutenolides

Li Chen,<sup>a,b</sup> Shengtong Niu,<sup>a</sup> Shouang Lan,<sup>a</sup> Wenjun Liu,<sup>a</sup> Shuang Yang\*<sup>a</sup> and Xinqiang Fang\*<sup>a</sup>

<sup>a</sup>State Key Laboratory of Structural Chemistry, and Key Laboratory of Coal to Ethylene Glycol and Its Related Technology, Center for Excellence in Molecular Synthesis, Fujian Institute of Research on the Structure of Matter, University of Chinese Academy of Sciences, Fuzhou 350100, China.

<sup>b</sup>College of Chemistry and Materials Science, Fujian Normal University, Fuzhou 350007, China..

### Table of Contents

|            |                                                                               |     |
|------------|-------------------------------------------------------------------------------|-----|
| <b>I</b>   | General information                                                           | S1  |
| <b>II</b>  | X-ray crystallographic analysis                                               | S2  |
| <b>III</b> | Typical procedure for the substrate synthesis                                 | S6  |
| <b>IV</b>  | Typical procedure for the reaction                                            | S7  |
| <b>V</b>   | Procedures for the product derivatizations                                    | S8  |
| <b>VI</b>  | Characterizations of new compounds                                            | S10 |
| <b>VII</b> | <sup>1</sup> H NMR and <sup>13</sup> C NMR spectra of substrates and products | S30 |

### I. General Information.

Commercially available chemicals were directly used without further purification, unless otherwise mentioned, all experiments and manipulations involving air- or moisture-sensitive compounds were performed using standard Schlenk technique. All solvents were purified and dried using typical procedures. Proton nuclear magnetic resonance (<sup>1</sup>H NMR) spectra were recorded on a Bruker AVANCE III HD400 (400 MHz) and ECZ600S (600 MHz) spectrometer. Chemical shifts were recorded in parts per million (ppm,  $\delta$ ) relative to tetramethylsilane ( $\delta = 0.00$  ppm). <sup>1</sup>H NMR splitting patterns are designated as singlet (s), doublet (d), triplet (t), quartet (q), dd (doublet of doublets); m (multiplet), and etc. All first-order splitting patterns were assigned on the basis of the appearance of the multiplet. Splitting patterns that could not be easily interpreted are designated as multiplet (m) or broad (br). Carbon nuclear magnetic resonance (<sup>13</sup>C NMR) spectra were recorded on a Bruker AVANCE III HD400 (101 MHz) and ECZ600S (151 MHz) spectrometers. High resolution mass spectral analysis (HRMS) was performed on Thermo Fisher Scientific Q Exactive Plus Hybrid Quadrupole-Orbitrap Mass Spectrometer. X-ray crystallography analysis was performed on Agilent Super Nova X-ray diffractionmeter. Analytical thin-layer chromatography (TLC) was carried out on WFH-203 F254 pre-coated silica gel plate

(0.2 mm thickness). Visualization was performed using a UV lamp or 2,4-Dinitrophenylhydrazine or potassium permanganate stain or phosphomolybdic acid.

## II. X-ray crystallographic analysis

Method for single crystals cultivation: a pure solid sample (10–20 mg) was dissolved in dichloromethane/ethyl acetate/THF (1 mL) in a vial at room temperature, and petroleum ether/hexane (2 mL) was added into the above solution slowly while keeping the sample completely dissolved. The vial was properly sealed with parafilm and kept at room temperature to allow the slow evaporation of the solvents until a single crystal was obtained.

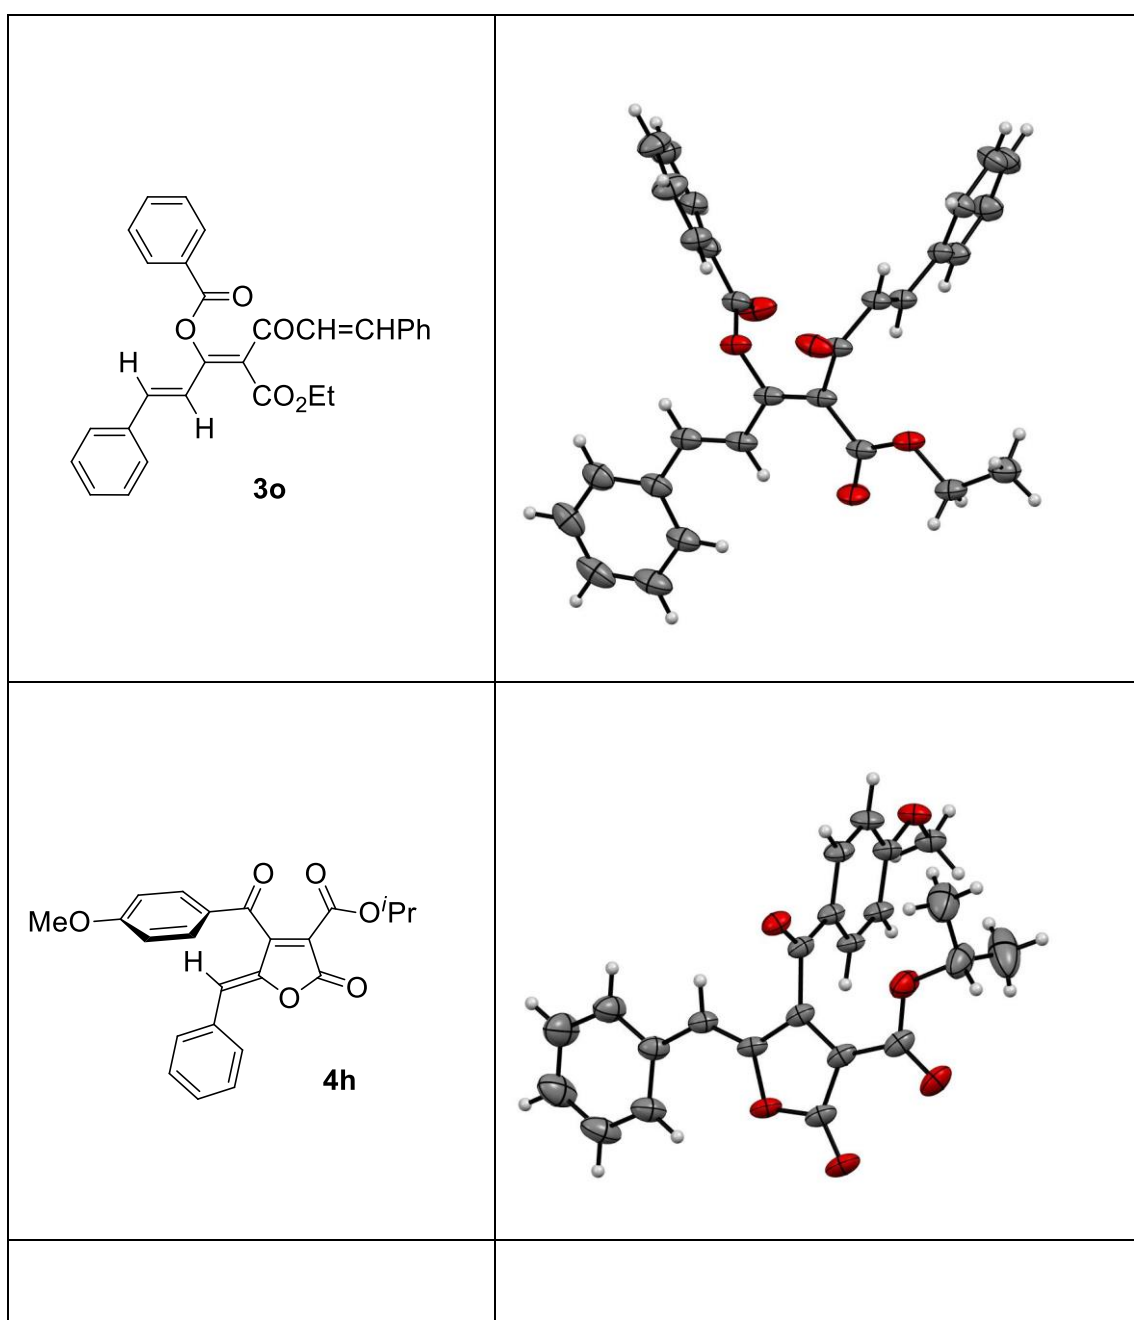

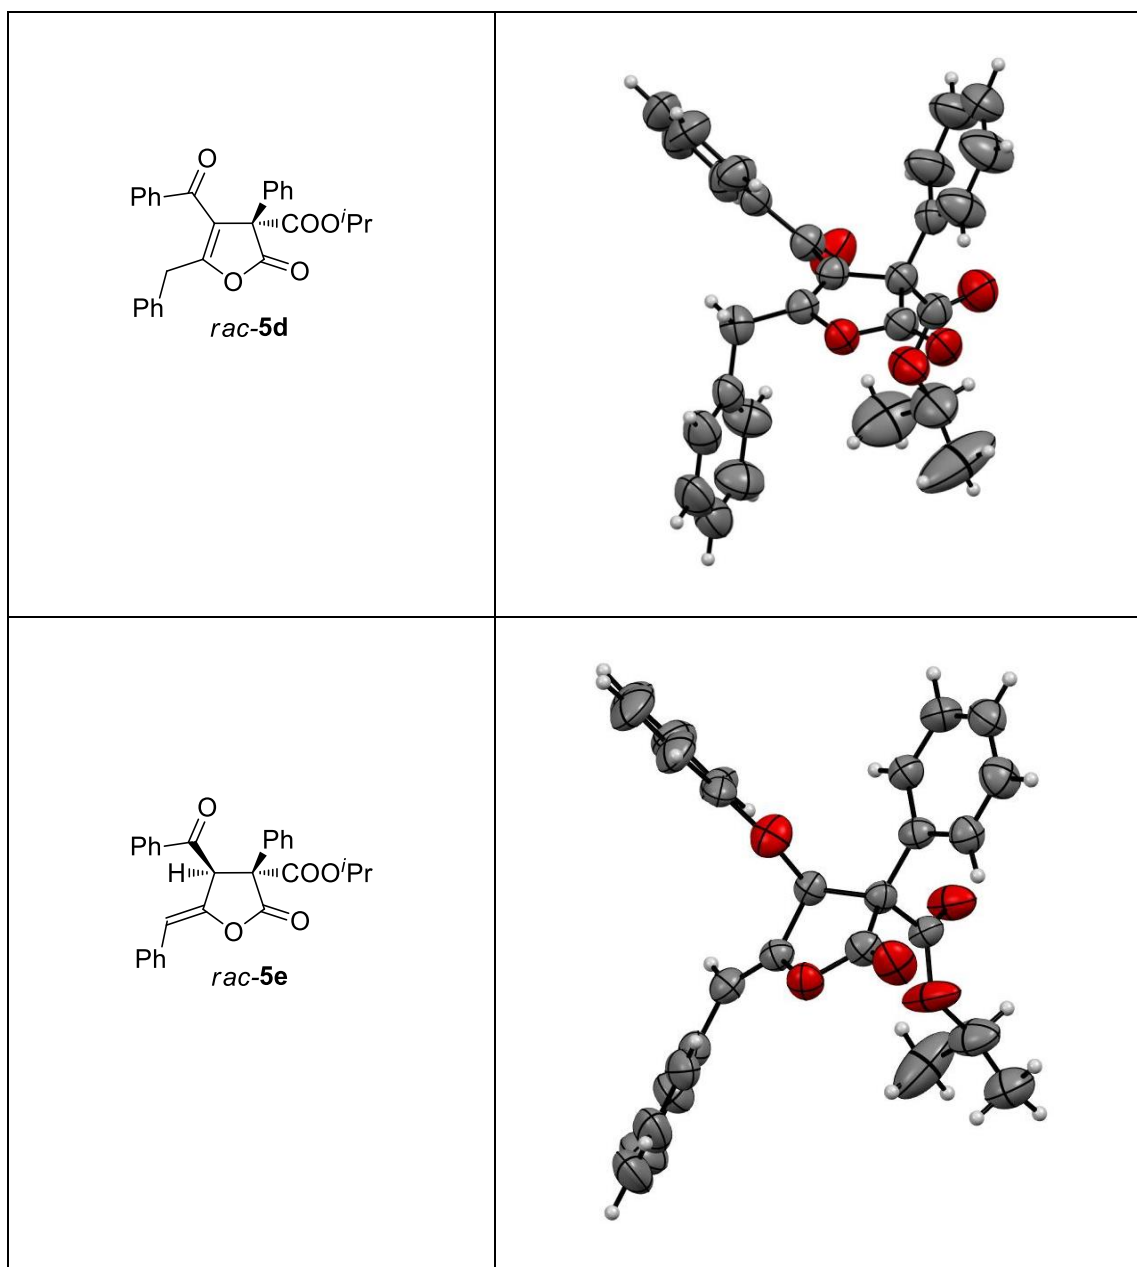

**Table S1 Crystal data and structure refinement for 3o**

|                     |                                                |
|---------------------|------------------------------------------------|
| Identification code | 3o 2131560                                     |
| Empirical formula   | C <sub>29</sub> H <sub>24</sub> O <sub>5</sub> |
| Formula weight      | 452.51                                         |
| Temperature/K       | 149.98(10)                                     |
| Crystal system      | triclinic                                      |
| Space group         | P-1                                            |
| a/Å                 | 9.1359(3)                                      |
| b/Å                 | 10.8744(3)                                     |
| c/Å                 | 12.1839(2)                                     |
| α/°                 | 83.076(2)                                      |
| β/°                 | 88.393(2)                                      |
| γ/°                 | 84.055(2)                                      |

|                                             |                                                               |
|---------------------------------------------|---------------------------------------------------------------|
| Volume/Å <sup>3</sup>                       | 1195.00(6)                                                    |
| Z                                           | 2                                                             |
| $\rho_{\text{calc}}/\text{cm}^3$            | 1.2575                                                        |
| $\mu/\text{mm}^{-1}$                        | 0.693                                                         |
| F(000)                                      | 477.6                                                         |
| Crystal size/mm <sup>3</sup>                | 0.2 × 0.05 × 0.05                                             |
| Radiation                                   | Cu K $\alpha$ ( $\lambda = 1.54184$ )                         |
| 2 $\Theta$ range for data collection/°      | 7.3 to 148.48                                                 |
| Index ranges                                | -8 ≤ h ≤ 11, -13 ≤ k ≤ 13, -14 ≤ l ≤ 15                       |
| Reflections collected                       | 12060                                                         |
| Independent reflections                     | 4710 [R <sub>int</sub> = 0.0544, R <sub>sigma</sub> = 0.0501] |
| Data/restraints/parameters                  | 4710/0/308                                                    |
| Goodness-of-fit on F <sup>2</sup>           | 1.027                                                         |
| Final R indexes [I ≥ 2 $\sigma$ (I)]        | R <sub>1</sub> = 0.0510, wR <sub>2</sub> = 0.1428             |
| Final R indexes [all data]                  | R <sub>1</sub> = 0.0558, wR <sub>2</sub> = 0.1498             |
| Largest diff. peak/hole / e Å <sup>-3</sup> | 0.21/-0.29                                                    |

**Table S2 Crystal data and structure refinement for 4h**

|                                        |                                                               |
|----------------------------------------|---------------------------------------------------------------|
| Identification code                    | 4h 2131561                                                    |
| Empirical formula                      | C <sub>23</sub> H <sub>20</sub> O <sub>6</sub>                |
| Formula weight                         | 392.39                                                        |
| Temperature/K                          | 293(2)                                                        |
| Crystal system                         | orthorhombic                                                  |
| Space group                            | Pccn                                                          |
| a/Å                                    | 12.0593(7)                                                    |
| b/Å                                    | 16.1161(10)                                                   |
| c/Å                                    | 20.7106(9)                                                    |
| $\alpha$ /°                            | 90                                                            |
| $\beta$ /°                             | 90                                                            |
| $\gamma$ /°                            | 90                                                            |
| Volume/Å <sup>3</sup>                  | 4025.1(4)                                                     |
| Z                                      | 8                                                             |
| $\rho_{\text{calc}}/\text{cm}^3$       | 1.295                                                         |
| $\mu/\text{mm}^{-1}$                   | 0.494                                                         |
| F(000)                                 | 1648.0                                                        |
| Crystal size/mm <sup>3</sup>           | 0.2 × 0.2 × 0.2                                               |
| Radiation                              | GaK $\alpha$ ( $\lambda = 1.3414$ )                           |
| 2 $\Theta$ range for data collection/° | 7.428 to 122.024                                              |
| Index ranges                           | -15 ≤ h ≤ 15, -19 ≤ k ≤ 20, -22 ≤ l ≤ 26                      |
| Reflections collected                  | 52295                                                         |
| Independent reflections                | 4591 [R <sub>int</sub> = 0.0705, R <sub>sigma</sub> = 0.0298] |
| Data/restraints/parameters             | 4591/0/266                                                    |
| Goodness-of-fit on F <sup>2</sup>      | 1.070                                                         |
| Final R indexes [I ≥ 2 $\sigma$ (I)]   | R <sub>1</sub> = 0.0670, wR <sub>2</sub> = 0.1843             |
| Final R indexes [all data]             | R <sub>1</sub> = 0.0804, wR <sub>2</sub> = 0.2027             |



Largest diff. peak/hole / e Å<sup>-3</sup> 0.41/-0.29

**Table S3 Crystal data and structure refinement for 5d**

|                                             |                                                               |
|---------------------------------------------|---------------------------------------------------------------|
| Identification code                         | 5d 2131562                                                    |
| Empirical formula                           | C <sub>28</sub> H <sub>24</sub> O <sub>5</sub>                |
| Formula weight                              | 440.47                                                        |
| Temperature/K                               | 293(2)                                                        |
| Crystal system                              | orthorhombic                                                  |
| Space group                                 | Pbca                                                          |
| a/Å                                         | 16.277(3)                                                     |
| b/Å                                         | 14.959(3)                                                     |
| c/Å                                         | 19.366(4)                                                     |
| α/°                                         | 90                                                            |
| β/°                                         | 90                                                            |
| γ/°                                         | 90                                                            |
| Volume/Å <sup>3</sup>                       | 4715.6(16)                                                    |
| Z                                           | 8                                                             |
| ρ <sub>calc</sub> /g/cm <sup>3</sup>        | 1.241                                                         |
| μ/mm <sup>-1</sup>                          | 0.085                                                         |
| F(000)                                      | 1856.0                                                        |
| Crystal size/mm <sup>3</sup>                | 0.3 × 0.25 × 0.15                                             |
| Radiation                                   | MoKα (λ = 0.71073)                                            |
| 2θ range for data collection/°              | 4.206 to 55.118                                               |
| Index ranges                                | -19 ≤ h ≤ 21, -19 ≤ k ≤ 19, -25 ≤ l ≤ 24                      |
| Reflections collected                       | 66511                                                         |
| Independent reflections                     | 5394 [R <sub>int</sub> = 0.0564, R <sub>sigma</sub> = 0.0222] |
| Data/restraints/parameters                  | 5394/268/300                                                  |
| Goodness-of-fit on F <sup>2</sup>           | 1.004                                                         |
| Final R indexes [I >= 2σ (I)]               | R <sub>1</sub> = 0.0931, wR <sub>2</sub> = 0.1925             |
| Final R indexes [all data]                  | R <sub>1</sub> = 0.1053, wR <sub>2</sub> = 0.2006             |
| Largest diff. peak/hole / e Å <sup>-3</sup> | 0.35/-0.24                                                    |

**Table S4 Crystal data and structure refinement for 5e**

|                     |                                                |
|---------------------|------------------------------------------------|
| Identification code | 5e 2131563                                     |
| Empirical formula   | C <sub>28</sub> H <sub>24</sub> O <sub>5</sub> |
| Formula weight      | 440.47                                         |
| Temperature/K       | 293(2)                                         |
| Crystal system      | orthorhombic                                   |
| Space group         | Pna2 <sub>1</sub>                              |
| a/Å                 | 20.333(4)                                      |
| b/Å                 | 6.4811(13)                                     |
| c/Å                 | 35.365(7)                                      |
| α/°                 | 90                                             |
| β/°                 | 90                                             |
| γ/°                 | 90                                             |

|                                             |                                                               |
|---------------------------------------------|---------------------------------------------------------------|
| Volume/Å <sup>3</sup>                       | 4660.4(16)                                                    |
| Z                                           | 8                                                             |
| ρ <sub>calc</sub> /g/cm <sup>3</sup>        | 1.256                                                         |
| μ/mm <sup>-1</sup>                          | 0.086                                                         |
| F(000)                                      | 1856.0                                                        |
| Crystal size/mm <sup>3</sup>                | 0.3 × 0.25 × 0.15                                             |
| Radiation                                   | MoKα (λ = 0.71073)                                            |
| 2θ range for data collection/°              | 2.304 to 48.33                                                |
| Index ranges                                | -23 ≤ h ≤ 23, -6 ≤ k ≤ 7, -33 ≤ l ≤ 40                        |
| Reflections collected                       | 42005                                                         |
| Independent reflections                     | 6627 [R <sub>int</sub> = 0.1130, R <sub>sigma</sub> = 0.0410] |
| Data/restraints/parameters                  | 6627/1/600                                                    |
| Goodness-of-fit on F <sup>2</sup>           | 1.119                                                         |
| Final R indexes [I ≥ 2σ (I)]                | R <sub>1</sub> = 0.0592, wR <sub>2</sub> = 0.1427             |
| Final R indexes [all data]                  | R <sub>1</sub> = 0.0738, wR <sub>2</sub> = 0.1542             |
| Largest diff. peak/hole / e Å <sup>-3</sup> | 0.38/-0.28                                                    |

### III. Typical procedure for the substrate synthesis

Substrates **1a–1f**, **1h–1l**, **1p** and **1q** are known compounds and were prepared according to the literature reports.<sup>[1-4]</sup>

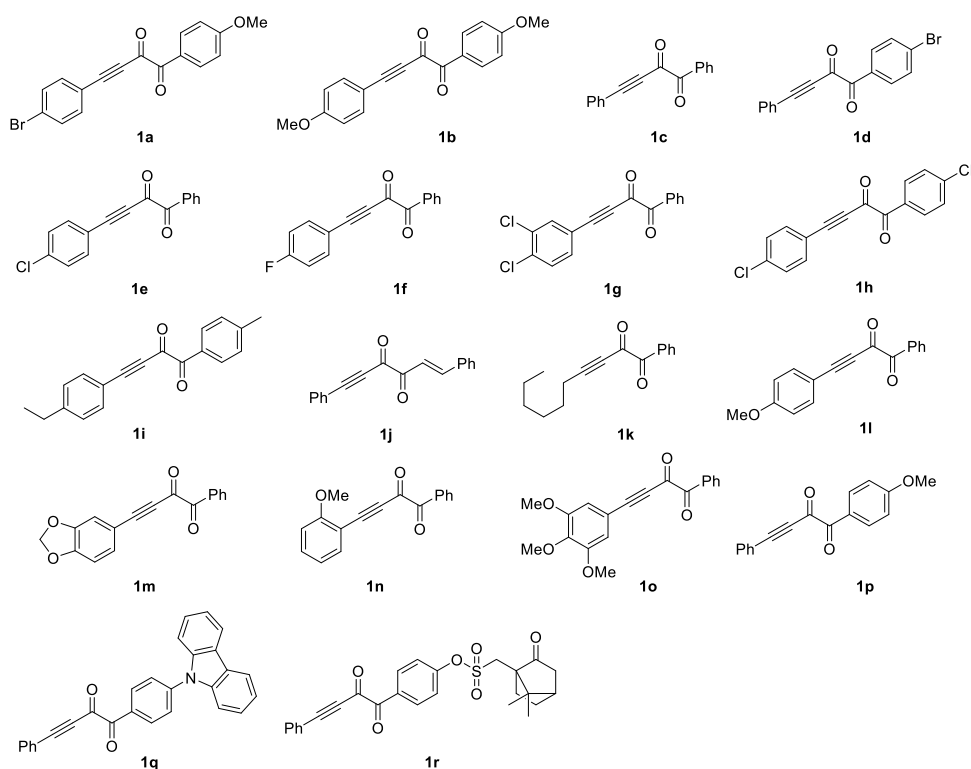

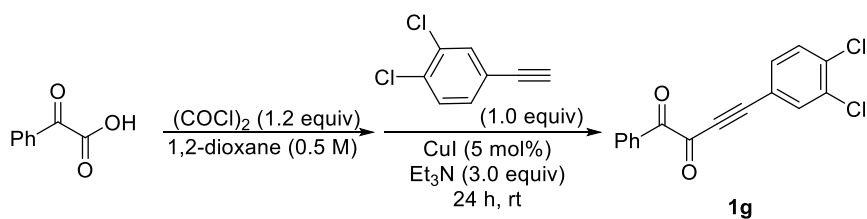

In a 50 mL of round bottom flask, phenylglyoxylic acid (10.0 mmol) was dissolved in 20 mL of 1,4-dioxane. To this solution oxalyl chloride (12.0 mmol, 1.2 equiv) was added dropwise to the reaction mixture at room temperature and the mixture was stirred at 50 °C for 4 h. Then the mixture was cooled to room temperature. CuI (95 mg, 0.50 mmol, 5 mol%), 1,2-dichloro-4-ethynylbenzene (10.0 mmol, 1 equiv), and dry triethylamine (30.0 mmol, 3 equiv) were successively added to the mixture, and stirring at room temperature was continued for 24 h. After complete conversion, water (50 mL) was added and the mixture was extracted with  $\text{CH}_2\text{Cl}_2$  ( $2 \times 15$  mL). Drying of the organic phase with anhydrous  $\text{Na}_2\text{SO}_4$  and subsequent evaporation gave crude products. The crude products were purified through a silica gel column using petroleum ether-ethyl acetate mixture (95:5 v/v) as eluent to obtain **1g** (1.7g, 56% yield). substrates **1g**, **1m–1o**, **1r** were synthesized using the same method.

#### IV. Typical procedures for the reaction.

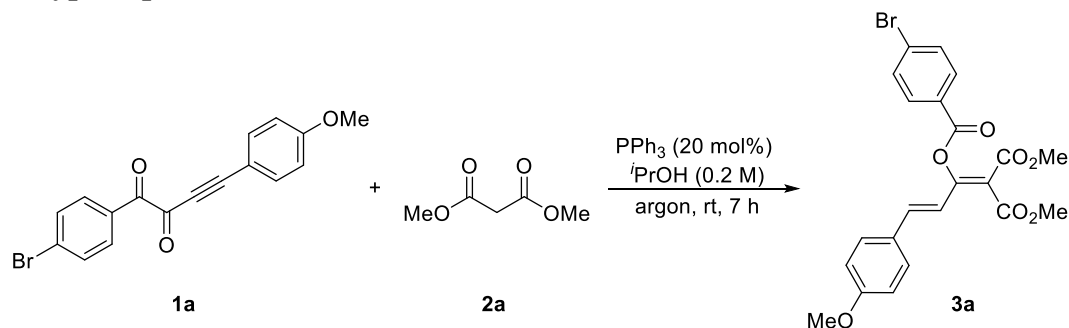

**1a** (68 mg, 0.2 mmol), **2a** (70  $\mu\text{L}$ , 0.6 mmol), and  $\text{Ph}_3\text{P}$  (10.6 mg, 0.04 mmol) was added to  $i\text{PrOH}$  (1 mL) at room temperature under argon atmosphere. The reaction system was stirred for 7 h. the solvent was removed under reduced pressure and the residue was purified by flash chromatography (petroleum ether/ethyl acetate, v:v = 5:1) to give the product **3a** (72 mg, 76% yield). Compounds **3b–3q** were synthesized using the same method.

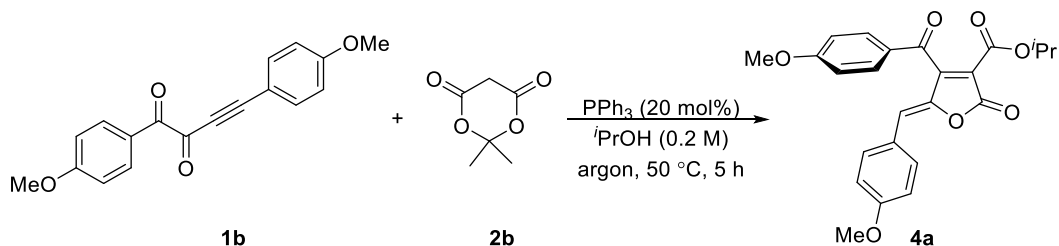

**1b** (59 mg, 0.2 mmol), **2b** (86 mg, 0.6 mmol), and  $\text{Ph}_3\text{P}$  (10.6 mg, 0.04 mmol) was added to  $^t\text{PrOH}$  (1 mL) at 50 °C under argon atmosphere. The reaction system was stirred for 5 h. the solvent was removed under reduced pressure and the residue was purified by flash chromatography (petroleum ether/ethyl acetate, v:v = 3:1) to give the product **4a** (61 mg, 72% yield). Compounds **4b–4q** were synthesized using the same method.

## V. Procedures for the product derivatizations.

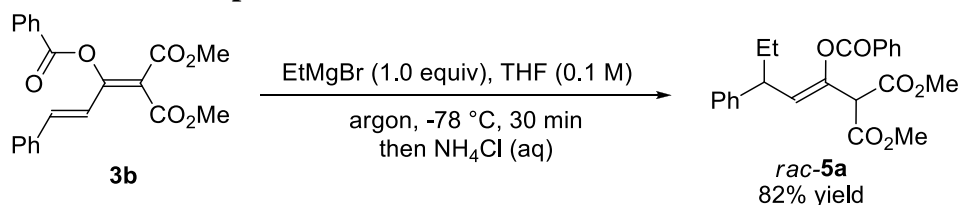

**3b** (37 mg, 0.1 mmol) was dissolved in THF (1 mL) and the solution was cooled down to -78 °C.  $\text{EtMgBr}$  (0.1 mL, 0.1 mmol, 1 M in THF) was added. The reaction mixture was stirred at -78 °C for 30 minutes. The mixture was quenched by saturated aqueous  $\text{NH}_4\text{Cl}$  and extracted with ethyl acetate (3×5 mL). The organic solvent was removed under reduced pressure and the residue was purified by flash chromatography (petroleum ether/ethyl acetate, v:v = 5:1) to give the product **5a** (33 mg, 82% yield).

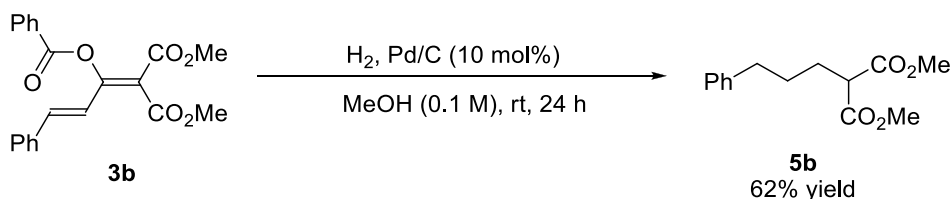

A flame dried vial was cooled under a stream of  $\text{N}_2$  and charged with **3b** (90 mg, 0.24 mmol),  $\text{MeOH}$  (2.4 mL), and  $\text{Pd/C}$  (26 mg, 0.024 mmol, 10% Pd). The vial was sparged with a balloon of hydrogen gas, then stirred under a balloon of hydrogen gas for 24 h. The reaction mixture was loaded onto a short plug of celite, and the plug was washed with ethyl acetate (3×2 mL). The organic solvent was removed under reduced pressure and the residue was purified by flash chromatography (petroleum ether/ethyl acetate, v:v = 10:1) to afford colorless oil **5b** (38 mg, 62% yield)

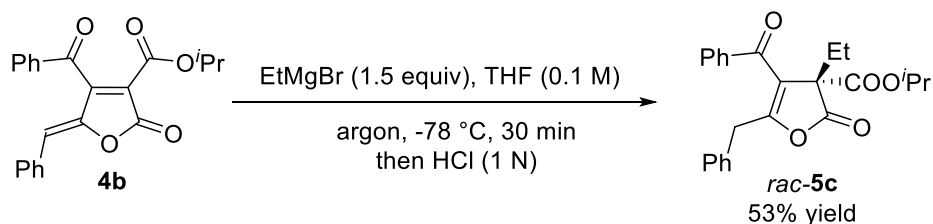

**4b** (56 mg, 0.15 mmol) was dissolved in THF (1.5 mL) and the solution was cooled down to  $-78\text{ }^\circ\text{C}$ . EtMgBr (0.23 mL, 0.23 mmol, 1 M in THF) was added. The reaction mixture was stirred at  $-78\text{ }^\circ\text{C}$  for 40 minutes. The mixture was quenched by aqueous HCl (1 N) and extracted with ethyl acetate ( $3 \times 5\text{ mL}$ ). The organic solvent was removed under reduced pressure and the residue was purified by flash chromatography (petroleum ether/ethyl acetate, v:v = 10:1) to give product **5c** (31 mg, 53% yield).

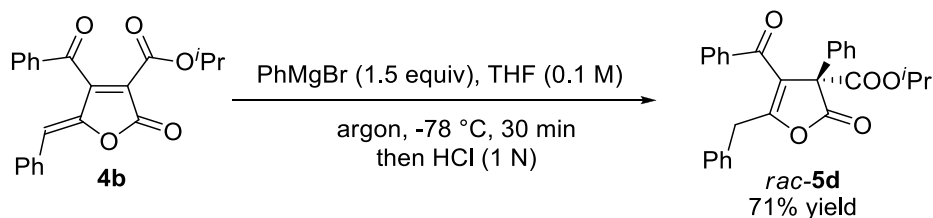

**4b** (56 mg, 0.15 mmol) was dissolved in THF (1.5 mL) and the solution was cooled down to  $-78\text{ }^\circ\text{C}$ . PhMgBr (0.23 mL, 0.23 mmol, 1 M in THF) was added. The reaction mixture was stirred at  $-78\text{ }^\circ\text{C}$  for 40 minutes. The mixture was quenched by aqueous HCl (1 N) and extracted with ethyl acetate ( $3 \times 5\text{ mL}$ ). The organic solvent was removed under reduced pressure and the residue was purified by flash chromatography (petroleum ether/ethyl acetate, v:v = 10:1) to give product **5d** (47 mg, 71% yield).

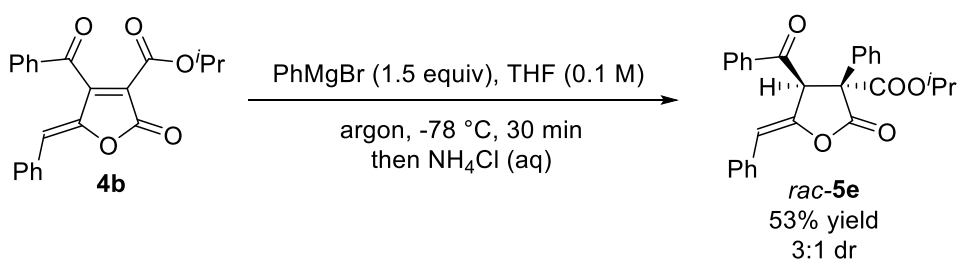

**4b** (74 mg, 0.2 mmol) was dissolved in THF (2 mL) and the solution was cooled down to  $-78\text{ }^\circ\text{C}$ . PhMgBr (0.3 mL, 0.3 mmol, 1 M in THF) was added. The reaction mixture was stirred at  $-78\text{ }^\circ\text{C}$  for 40 minutes. The mixture was quenched by saturated aqueous  $\text{NH}_4\text{Cl}$  and extracted with ethyl acetate ( $3 \times 5\text{ mL}$ ). The organic solvent was removed under reduced pressure and the residue was purified by flash chromatography (petroleum ether/ethyl acetate, v:v = 10:1) to give product **5e** (47 mg, 53% yield, 3:1 dr).

## VI. Characterizations of new compounds

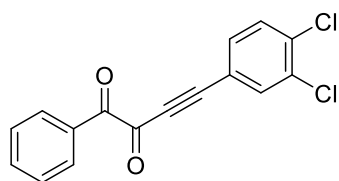

**1g**

**1,4-bis(4-methoxyphenyl)but-3-yn-1,2-dione (1g):** purified by flash chromatography on silica gel (petroleum ether/ethyl acetate, v:v = 10:1), yellow solid, mp 85–87 °C, 1.7 g, 56% yield. <sup>1</sup>H NMR (400 MHz, CDCl<sub>3</sub>) δ 8.10–8.07 (m, 2H), 7.75 (d, *J* = 1.2 Hz, 1H), 7.69 (t, *J* = 7.4 Hz, 1H), 7.57–7.46 (m, 4H); <sup>13</sup>C NMR (151 MHz, CDCl<sub>3</sub>) δ 187.9, 177.8, 136.7, 135.2, 135.0, 133.4, 132.5, 131.5, 131.0, 130.7, 129.1, 119.2, 95.4, 88.0. HRMS (MALDI-Quadrupole-Orbitrap) *m/z*: [M + H]<sup>+</sup> Calcd for C<sub>16</sub>H<sub>8</sub>Cl<sub>2</sub>O<sub>2</sub>H<sup>+</sup> 302.9974; Found 302.9978. IR (KBr thin film, cm<sup>-1</sup>): ν 3072, 2988, 2196, 1676, 1646, 1459, 1375, 1129, 1111, 947, 828, 690, 673, 650.

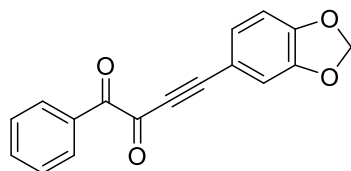

**1m**

**1,4-bis(4-methoxyphenyl)but-3-yn-1,2-dione (1m):** purified by flash chromatography on silica gel (petroleum ether/ethyl acetate, v:v = 5:1), yellow solid, mp 79–81 °C, 0.97 g, 33% yield. <sup>1</sup>H NMR (400 MHz, CDCl<sub>3</sub>) δ 8.09–8.06 (m, 2H), 7.67 (t, *J* = 7.5 Hz, 1H), 7.53 (t, *J* = 7.4 Hz, 2H), 7.26–7.23 (m, 1H), 7.07–7.04 (m, 1H), 6.83 (d, *J* = 8.1 Hz, 1H), 6.05 (d, *J* = 0.7 Hz, 2H); <sup>13</sup>C NMR (101 MHz, CDCl<sub>3</sub>) δ 188.6, 178.4, 151.1, 147.8, 134.8, 131.7, 130.5, 130.3, 128.9, 113.0, 112.1, 109.0, 102.0, 100.4, 86.9. HRMS (MALDI-Quadrupole-Orbitrap) *m/z*: [M + H]<sup>+</sup> Calcd for C<sub>17</sub>H<sub>10</sub>O<sub>4</sub>H<sup>+</sup> 279.0652; Found 279.0655. IR (KBr thin film, cm<sup>-1</sup>): ν 2989, 2899, 2184, 1670, 1642, 1593, 1487, 1442, 1257, 1216, 1039, 935, 886, 859, 808, 676, 612.

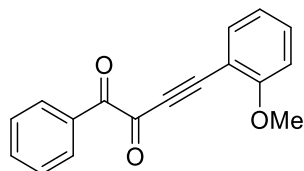

**1n**

**1,4-bis(4-methoxyphenyl)but-3-yn-1,2-dione (1n):** purified by flash chromatography on silica gel (petroleum ether/ethyl acetate, v:v = 5:1), yellow solid, mp 48–50 °C, 1.4 g, 53% yield. <sup>1</sup>H NMR (400 MHz, CDCl<sub>3</sub>) δ 8.09 (d, *J* = 7.8 Hz, 2H), 7.66 (d, *J* = 7.3 Hz, 1H), 7.59–7.44 (m, 4H), 6.99–6.90 (m, 2H), 3.90 (d, *J* = 2.0 Hz, 3H); <sup>13</sup>C NMR (101 MHz, CDCl<sub>3</sub>) δ 188.7, 178.6, 162.2, 135.6, 134.8, 133.7,

131.8, 130.5, 128.9, 120.7, 111.0, 108.5, 97.1, 91.3, 55.9. HRMS (MALDI-Quadrupole-Orbitrap)  $m/z$ :  $[M + H]^+$  Calcd for  $C_{17}H_{12}O_3H^+$  265.0859; Found 265.0862. IR (KBr thin film,  $cm^{-1}$ ):  $\nu$  2948, 2842, 2176, 1680, 1638, 1693, 1487, 1449, 1254, 1096, 926, 754, 714, 675.

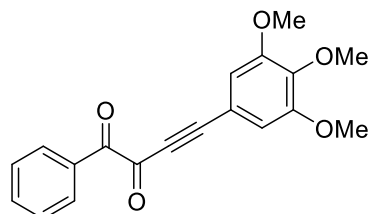

1o

**1,4-bis(4-methoxyphenyl)but-3-yn-1,2-dione (1o):** purified by flash chromatography on silica gel (petroleum ether/ethyl acetate, v:v = 5:1), yellow solid, mp 68–70 °C, 1.1 g, 35% yield.  $^1H$  NMR (400 MHz,  $CDCl_3$ )  $\delta$  8.09 (d,  $J = 7.5$  Hz, 2H), 7.68 (t,  $J = 7.4$  Hz, 1H), 7.53 (t,  $J = 7.8$  Hz, 2H), 6.90 (s, 2H), 3.91 (s, 3H), 3.87 (s, 6H);  $^{13}C$  NMR (101 MHz,  $CDCl_3$ )  $\delta$  188.5, 178.3, 153.2, 141.9, 134.9, 131.6, 130.5, 128.9, 113.7, 111.1, 99.9, 86.8, 61.1, 56.3. HRMS (MALDI-Quadrupole-Orbitrap)  $m/z$ :  $[M + H]^+$  Calcd for  $C_{19}H_{16}O_5H^+$  325.1071; Found 325.1074. IR (KBr thin film,  $cm^{-1}$ ):  $\nu$  2949, 2842, 2178, 1670, 1643, 1574, 1449, 1410, 1237, 1123, 1101, 001, 836, 679, 638.

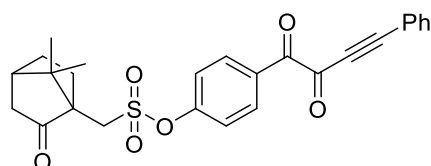

1r

**1,4-bis(4-methoxyphenyl)but-3-yn-1,2-dione (1r):** purified by flash chromatography on silica gel (petroleum ether/ethyl acetate, v:v = 5:1), yellow liquid, 1.6 g, 34% yield.  $^1H$  NMR (400 MHz,  $CDCl_3$ )  $\delta$  8.19 (d,  $J = 8.7$  Hz, 2H), 7.67 (d,  $J = 7.5$  Hz, 2H), 7.55–7.40 (m, 5H), 3.86 (d,  $J = 15.0$  Hz, 1H), 3.25 (d,  $J = 15.0$  Hz, 1H), 2.57–2.40 (m, 2H), 2.18–1.97 (m, 3H), 1.79–1.71 (m, 1H), 1.52–1.45 (m, 1H), 1.16 (s, 3H), 0.92 (s, 3H);  $^{13}C$  NMR (151 MHz,  $CDCl_3$ )  $\delta$  213.9, 186.7, 177.7, 154.0, 133.8, 132.8, 131.9, 130.3, 128.9, 122.5, 119.2, 99.7, 87.1, 58.2, 48.6, 48.1, 42.9, 42.5, 27.0, 25.3, 20.0, 19.8. HRMS (MALDI-Quadrupole-Orbitrap)  $m/z$ :  $[M + H]^+$  Calcd for  $C_{26}H_{24}O_6SH^+$  465.1366; Found 465.1370. IR (KBr thin film,  $cm^{-1}$ ):  $\nu$  2967, 2360, 2342, 2191, 1744, 1654, 1595, 1374, 1147, 1105, 856, 759, 688, 516.

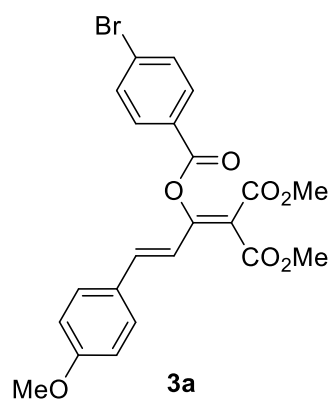

**dimethyl (E)-2-(1-((4-bromobenzoyl)oxy)-3-(4-methoxyphenyl)allylidene)malonate (3a):** purified by flash chromatography on silica gel (petroleum ether/ethyl acetate, v:v = 5:1), yellow solid, mp 151–153 °C, 72 mg, 76% yield. <sup>1</sup>H NMR (400 MHz, CDCl<sub>3</sub>) δ 8.03 (d, *J* = 8.6 Hz, 2H), 7.68 (d, *J* = 8.6 Hz, 2H), 7.49 (d, *J* = 15.8 Hz, 1H), 7.43 (d, *J* = 8.8 Hz, 2H), 7.00 (d, *J* = 15.8 Hz, 1H), 6.86 (d, *J* = 8.8 Hz, 2H), 3.87 (s, 3H), 3.82 (s, 3H), 3.64 (s, 3H); <sup>13</sup>C NMR (151 MHz, CDCl<sub>3</sub>) δ 164.5, 163.9, 162.8, 161.4, 158.6, 139.2, 132.2, 131.8, 129.9, 129.4, 127.7, 127.4, 116.8, 115.2, 114.3, 55.4, 52.7, 52.5. HRMS (MALDI-Quadrupole-Orbitrap) *m/z*: [M + H]<sup>+</sup> Calcd for C<sub>22</sub>H<sub>19</sub>BrO<sub>7</sub>H<sup>+</sup> 475.0387; Found 475.0390. IR (KBr thin film, cm<sup>-1</sup>): ν 3091, 3007, 2932, 2835, 1745, 1731, 1577, 1490, 1213, 1167, 819, 745.

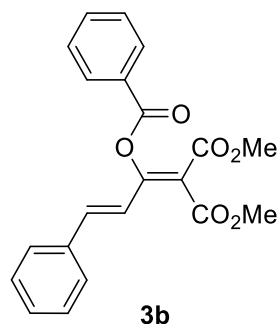

**dimethyl (E)-2-(1-(benzoyloxy)-3-phenylallylidene)malonate (3b):** purified by flash chromatography on silica gel (petroleum ether/ethyl acetate, v:v = 5:1), yellow solid, mp 99–101 °C, 42 mg, 55% yield. <sup>1</sup>H NMR (600 MHz, CDCl<sub>3</sub>) δ 8.18 (dd, *J* = 8.3, 1.2 Hz, 2H), 7.70–7.66 (m, 2H), 7.56–7.53 (m, 2H), 7.49–7.48 (m, 2H), 7.36–7.33 (m, 3H), 7.08 (d, *J* = 15.9 Hz, 1H), 3.88 (s, 3H), 3.64 (s, 3H); <sup>13</sup>C NMR (151 MHz, CDCl<sub>3</sub>) δ 162.4, 164.0, 163.5, 158.5, 139.5, 135.1, 134.2, 130.5, 130.2, 128.9, 128.4, 128.3, 119.4, 116.6, 52.8, 52.6. HRMS (MALDI-Quadrupole-Orbitrap) *m/z*: [M + H]<sup>+</sup> Calcd for C<sub>21</sub>H<sub>18</sub>O<sub>6</sub>H<sup>+</sup> 367.1176; Found 367.1181. IR (KBr thin film, cm<sup>-1</sup>): ν 3092, 3022, 2945, 2873, 1739, 1716, 1616, 1585, 1218, 1046, 751, 706.



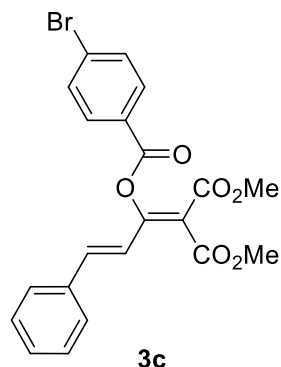

**dimethyl (E)-2-(1-((4-bromobenzoyl)oxy)-3-phenylallylidene)malonate (3c):** purified by flash chromatography on silica gel (petroleum ether/ethyl acetate, v:v = 5:1), yellow solid, mp 111–113 °C, 59 mg, 66% yield. <sup>1</sup>H NMR (400 MHz, CDCl<sub>3</sub>) δ 8.04 (d, *J* = 8.6 Hz, 2H), 7.69 (d, *J* = 8.6 Hz, 2H), 7.62 (d, *J* = 15.9 Hz, 1H), 7.49–7.47 (m, 2H), 7.35–7.34 (m, 3H), 7.05 (d, *J* = 15.9 Hz, 1H), 3.89 (s, 3H), 3.65 (s, 3H); <sup>13</sup>C NMR (101 MHz, CDCl<sub>3</sub>) δ 164.3, 163.7, 162.8, 158.1, 139.4, 134.9, 132.2, 131.8, 130.2, 129.5, 128.8, 128.2, 127.3, 119.1, 116.5, 52.8, 52.5. HRMS (MALDI-Quadrupole-Orbitrap) *m/z*: [M + H]<sup>+</sup> Calcd for C<sub>21</sub>H<sub>17</sub>BrO<sub>6</sub>H<sup>+</sup> 445.0281; Found 445.0279. IR (KBr thin film, cm<sup>-1</sup>): ν 3085, 3013, 2938, 2867, 1728, 1584, 1484, 1173, 1060, 757, 685.

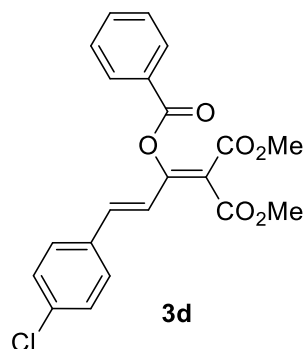

**dimethyl (E)-2-(1-(benzoyloxy)-3-(4-chlorophenyl)allylidene)malonate (3d):** purified by flash chromatography on silica gel (petroleum ether/ethyl acetate, v:v = 5:1), yellow solid, mp 94–96 °C, 44 mg, 55% yield. <sup>1</sup>H NMR (600 MHz, CDCl<sub>3</sub>) δ 8.16 (dd, *J* = 8.1, 1.1 Hz, 2H), 7.69–7.66 (m, 2H), 7.56–7.52 (m, 2H), 7.41 (d, *J* = 8.6 Hz, 2H), 7.31 (d, *J* = 8.6 Hz, 2H), 7.00 (d, *J* = 15.9 Hz, 1H), 3.88 (s, 3H), 3.64 (s, 3H); <sup>13</sup>C NMR (101 MHz, CDCl<sub>3</sub>) δ 164.2, 163.9, 163.4, 158.1, 137.8, 135.9, 134.2, 133.5, 130.4, 129.3, 129.1, 128.9, 128.2, 119.8, 116.9, 52.8, 52.6. HRMS (MALDI-Quadrupole-Orbitrap) *m/z*: [M + H]<sup>+</sup> Calcd for C<sub>21</sub>H<sub>17</sub>ClO<sub>6</sub>H<sup>+</sup> 401.0786; Found 401.0791. IR (KBr thin film, cm<sup>-1</sup>): ν 3098, 3025, 2924, 2823, 1720, 1620, 1260, 1082, 703, 697.

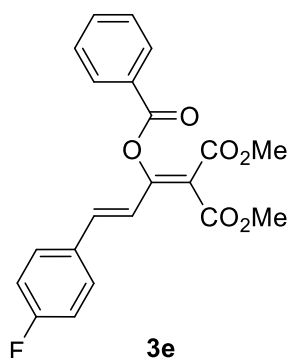

**dimethyl (E)-2-(1-(benzoyloxy)-3-(4-fluorophenyl)allylidene)malonate (3e):** purified by flash chromatography on silica gel (petroleum ether/ethyl acetate, v:v = 5:1), yellow solid, mp 93–95 °C, 50 mg, 66% yield. <sup>1</sup>H NMR (600 MHz, CDCl<sub>3</sub>) δ 8.17–8.15 (m, 2H), 7.68–7.66 (m, 1H), 7.61 (d, *J* = 15.9 Hz, 1H), 7.54–7.52 (m, 2H), 7.47–7.44 (m, 2H), 7.03–7.00 (m, 3H), 3.87 (s, 3H), 3.63 (s, 3H); <sup>13</sup>C NMR (101 MHz, CDCl<sub>3</sub>) δ 165.0, 163.9, 163.9 (d, *J* = 88.0 Hz), 162.5, 158.3, 138.0, 134.2, 131.3 (d, *J* = 3.3 Hz), 130.4, 130.0 (d, *J* = 8.5 Hz), 128.8, 128.3, 119.1 (d, *J* = 2.3 Hz), 116.5, 116.0 (d, *J* = 22.1 Hz), 52.7, 52.5. HRMS (MALDI-Quadrupole-Orbitrap) *m/z*: [M + H]<sup>+</sup> Calcd for C<sub>21</sub>H<sub>17</sub>FO<sub>6</sub>H<sup>+</sup> 385.1082; Found 385.1086. IR (KBr thin film, cm<sup>-1</sup>): ν 3094, 3013, 2956, 2877, 1714, 1573, 1217, 1058, 1013, 699.

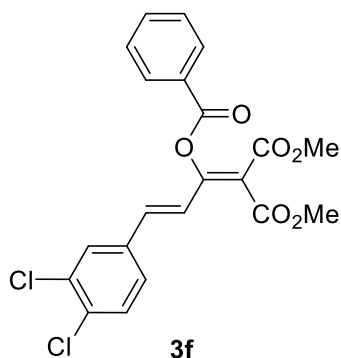

**dimethyl (E)-2-(1-(benzoyloxy)-3-(3,4-dichlorophenyl)allylidene)malonate (3f):** purified by flash chromatography on silica gel (petroleum ether/ethyl acetate, v:v = 5:1), yellow solid, mp 91–93 °C, 52 mg, 60% yield. <sup>1</sup>H NMR (600 MHz, CDCl<sub>3</sub>) δ 8.17–8.15 (m, 2H), 7.72–7.68 (m, 2H), 7.56–7.53 (m, 3H), 7.41 (d, *J* = 8.3 Hz, 1H), 7.32 (dd, *J* = 8.4, 1.9 Hz, 1H), 6.94 (d, *J* = 15.9 Hz, 1H), 3.89 (s, 3H), 3.64 (s, 3H); <sup>13</sup>C NMR (151 MHz, CDCl<sub>3</sub>) δ 164.2, 163.9, 163.5, 157.7, 136.5, 135.1, 134.4, 133.9, 133.3, 130.9, 130.5, 129.8, 129.0, 128.1, 127.0, 121.1, 117.7, 52.9, 52.7. HRMS (MALDI-Quadrupole-Orbitrap) *m/z*: [M + H]<sup>+</sup> Calcd for C<sub>21</sub>H<sub>16</sub>Cl<sub>2</sub>O<sub>6</sub>H<sup>+</sup> 435.0397; Found 435.0400. IR (KBr thin film, cm<sup>-1</sup>): ν 3078, 3033, 2920, 2850, 1732, 1619, 1216, 1082, 1044, 698.

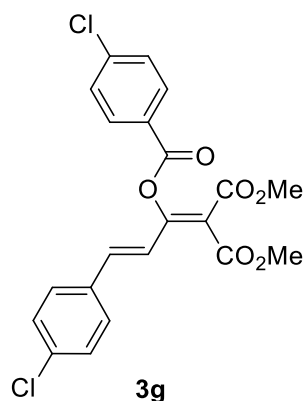

**dimethyl (E)-2-(1-((4-chlorobenzoyl)oxy)-3-(4-chlorophenyl)allylidene)malonate**

**(3g)** : purified by flash chromatography on silica gel (petroleum ether/ethyl acetate, v:v = 5:1), yellow solid, mp 134–136 °C, 64 mg, 74% yield. <sup>1</sup>H NMR (400 MHz, CDCl<sub>3</sub>) δ 8.10 (d, *J* = 8.5 Hz, 2H), 7.62 (d, *J* = 15.9 Hz, 1H), 7.52 (d, *J* = 8.4 Hz, 2H), 7.41 (d, *J* = 8.5 Hz, 2H), 7.32 (d, *J* = 8.5 Hz, 2H), 6.98 (d, *J* = 15.9 Hz, 1H), 3.88 (s, 3H), 3.65 (s, 3H); <sup>13</sup>C NMR (101 MHz, CDCl<sub>3</sub>) δ 164.2, 163.7, 162.6, 157.8, 140.9, 137.9, 136.0, 133.4, 131.7, 129.3, 129.1, 126.7, 119.7, 116.9, 52.8, 52.6. HRMS (MALDI-Quadrupole-Orbitrap) *m/z*: [M + H]<sup>+</sup> Calcd for C<sub>21</sub>H<sub>16</sub>Cl<sub>2</sub>O<sub>6</sub>H<sup>+</sup> 435.0397; Found 435.0401. IR (KBr thin film, cm<sup>-1</sup>): ν 3111, 2956, 2923, 2850, 1721, 1584, 1219, 1075, 1010, 815.

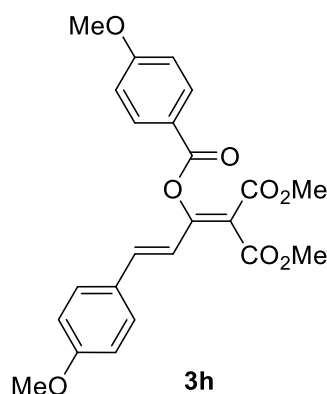

**dimethyl (E)-2-(1-((4-methoxybenzoyl)oxy)-3-(4-methoxyphenyl)allylidene)malonate (3h):**

purified by flash chromatography on silica gel (petroleum ether/ethyl acetate, v:v = 5:1), yellow solid, mp 115–117 °C, 60 mg, 70% yield. <sup>1</sup>H NMR (400 MHz, CDCl<sub>3</sub>) δ 8.13 (d, *J* = 8.8 Hz, 2H), 7.58 (d, *J* = 15.8 Hz, 1H), 7.43 (d, *J* = 8.8 Hz, 2H), 7.05–6.99 (m, 3H), 6.86 (d, *J* = 8.7 Hz, 2H), 3.91 (s, 3H), 3.87 (s, 3H), 3.82 (s, 3H), 3.63 (s, 3H); <sup>13</sup>C NMR (151 MHz, CDCl<sub>3</sub>) δ 164.7, 164.4, 164.3, 163.3, 161.3, 159.2, 139.3, 132.7, 129.9, 128.0, 120.7, 117.2, 115.3, 114.4, 114.2, 55.7, 55.5, 52.6, 52.5. HRMS (MALDI-Quadrupole-Orbitrap) *m/z*: [M + H]<sup>+</sup> Calcd for C<sub>23</sub>H<sub>22</sub>O<sub>8</sub>H<sup>+</sup> 427.1387; Found 427.1389. IR (KBr thin film, cm<sup>-1</sup>): ν 3096, 2948, 2920, 2843, 1727, 1582, 1510, 1252, 1164, 1077, 1020, 979, 825, 757.

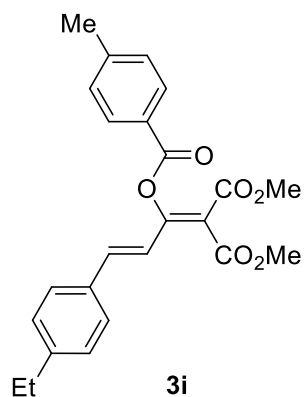

**dimethyl (E)-2-(3-(4-ethylphenyl)-1-((4-methylbenzoyl)oxy)allylidene)malonate (3i):** purified by flash chromatography on silica gel (petroleum ether/ethyl acetate, v:v = 5:1), yellow solid, mp 104–106 °C, 45 mg, 55% yield. <sup>1</sup>H NMR (400 MHz, CDCl<sub>3</sub>) δ 8.06 (d, *J* = 8.0 Hz, 2H), 7.65 (d, *J* = 15.8 Hz, 1H), 7.40 (d, *J* = 8.0 Hz, 2H), 7.33 (d, *J* = 8.0 Hz, 2H), 7.16 (d, *J* = 8.0 Hz, 2H), 7.05 (d, *J* = 15.8 Hz, 1H), 3.87 (s, 3H), 3.63 (s, 3H), 2.64 (q, *J* = 7.6 Hz, 2H), 2.47 (s, 3H), 1.22 (t, *J* = 7.6 Hz, 3H); <sup>13</sup>C NMR (151 MHz, CDCl<sub>3</sub>) δ 164.5, 164.2, 163.6, 158.9, 146.9, 145.1, 139.6, 132.7, 130.5, 129.6, 128.5, 128.4, 125.7, 118.5, 116.0, 52.7, 52.6, 28.9, 21.9, 15.4. HRMS (MALDI-Quadrupole-Orbitrap) *m/z*: [M + H]<sup>+</sup> Calcd for C<sub>24</sub>H<sub>24</sub>O<sub>6</sub>H<sup>+</sup> 409.1646; Found 409.1649. IR (KBr thin film, cm<sup>-1</sup>): ν 3032, 2954, 1718, 1592, 1224, 1175, 1080, 1061, 1014, 824, 739.

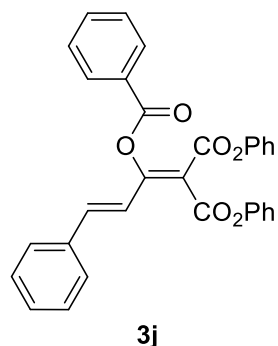

**diphenyl (E)-2-(1-(benzyloxy)-3-phenylallylidene)malonate (3j):** purified by flash chromatography on silica gel (petroleum ether/ethyl acetate, v:v = 5:1), white solid, mp 117–119 °C, 45 mg, 46% yield. <sup>1</sup>H NMR (400 MHz, CDCl<sub>3</sub>) δ 8.24 (d, *J* = 7.5 Hz, 2H), 7.90 (d, *J* = 15.8 Hz, 1H), 7.69 (t, *J* = 7.5 Hz, 1H), 7.57–7.52 (m, 4H), 7.46 (t, *J* = 7.8 Hz, 2H), 7.36–7.30 (m, 8H), 7.22–7.16 (m, 2H), 7.02 (d, *J* = 7.9 Hz, 2H); <sup>13</sup>C NMR (151 MHz, CDCl<sub>3</sub>) δ 163.4, 162.6, 162.2, 160.7, 150.5, 150.4, 141.0, 134.9, 134.4, 130.7, 130.6, 129.8, 129.6, 129.0, 128.5, 128.2, 126.5, 126.3, 121.6, 121.4, 119.2, 115.6. HRMS (MALDI-Quadrupole-Orbitrap) *m/z*: [M + H]<sup>+</sup> Calcd for C<sub>31</sub>H<sub>22</sub>O<sub>6</sub>H<sup>+</sup> 491.1489; Found 491.1494. IR (KBr thin film, cm<sup>-1</sup>): ν 3059, 3042, 2923, 2857, 1743, 1592, 1483, 1337, 1194, 1124, 1069, 741, 689, 494.

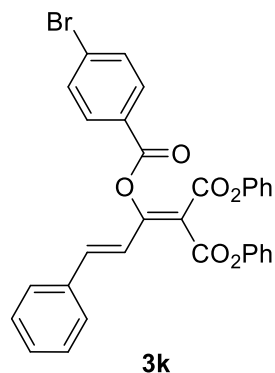

**diphenyl (E)-2-(1-((4-bromobenzoyl)oxy)-3-phenylallylidene)malonate (3k):** purified by flash chromatography on silica gel (petroleum ether/ethyl acetate, v:v = 5:1), yellow solid, mp 93–95 °C, 88 mg, 77% yield. <sup>1</sup>H NMR (400 MHz, CDCl<sub>3</sub>) δ 8.09 (d, *J* = 8.5 Hz, 2H), 7.85 (d, *J* = 15.8 Hz, 1H), 7.69 (d, *J* = 8.4 Hz, 2H), 7.53–7.51 (m, 2H), 7.48–7.44 (m, 2H), 7.37–7.29 (m, 5H), 7.27–7.19 (m, 5H), 7.04 (d, *J* = 7.8 Hz, 2H); <sup>13</sup>C NMR (151 MHz, CDCl<sub>3</sub>) δ 162.8, 162.6, 162.0, 160.5, 150.5, 150.3, 141.1, 134.8, 132.4, 132.1, 130.7, 129.9, 129.8, 129.7, 129.1, 128.5, 127.1, 126.5, 126.3, 121.6, 121.4, 119.0, 115.6. HRMS (MALDI-Quadrupole-Orbitrap) *m/z*: [M + H]<sup>+</sup> Calcd for C<sub>31</sub>H<sub>21</sub>BrO<sub>6</sub>H<sup>+</sup> 591.0414; Found 591.0419. IR (KBr thin film, cm<sup>-1</sup>): ν 3082, 3061, 2997, 2846, 1741, 1483, 1190, 1131, 1069, 936, 742, 687, 492.

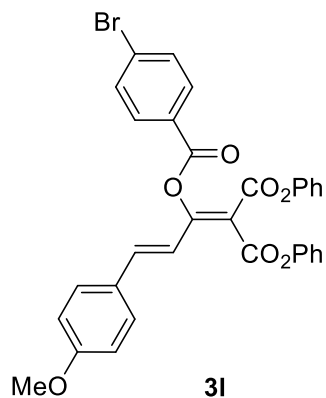

**Diphenyl (E)-2-(1-((4-bromobenzoyl)oxy)-3-(4-methoxyphenyl)allylidene)malonate (3l):** purified by flash chromatography on silica gel (petroleum ether/ethyl acetate, v:v = 5:1), yellow solid, mp 144–146 °C, 76 mg, 63% yield. <sup>1</sup>H NMR (600 MHz, CDCl<sub>3</sub>) δ 8.08 (d, *J* = 8.4 Hz, 2H), 7.72 (d, *J* = 15.8 Hz, 1H), 7.68 (d, *J* = 8.4 Hz, 2H), 7.48–7.44 (m, 4H), 7.33–7.29 (m, 3H), 7.25 (d, *J* = 8.8 Hz, 1H), 7.21–7.15 (m, 2H), 7.03 (d, *J* = 8.0 Hz, 2H), 6.87 (d, *J* = 8.7 Hz, 2H), 3.83 (s, 3H); <sup>13</sup>C NMR (151 MHz, CDCl<sub>3</sub>) δ 162.9, 162.8, 162.2, 161.8, 161.1, 150.5, 150.4, 140.9, 132.4, 132.1, 130.4, 129.8, 129.6, 127.6, 127.2, 126.4, 126.2, 121.6, 121.4, 116.7, 114.5, 114.2, 55.5. HRMS (MALDI-Quadrupole-Orbitrap) *m/z*: [M + H]<sup>+</sup> Calcd for C<sub>32</sub>H<sub>23</sub>BrO<sub>7</sub>H<sup>+</sup> 599.0700; Found 599.0706. IR (KBr thin film, cm<sup>-1</sup>): ν 3087, 2924,

2839, 1732, 1584, 1484, 1168, 1052, 1006, 959, 741, 687.

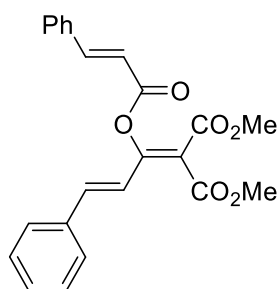

**3m**

**dimethyl 2-((*E*)-1-(cinnamoyloxy)-3-phenylallylidene)malonate (3m):** purified by flash chromatography on silica gel (petroleum ether/ethyl acetate, v:v = 5:1), yellow solid, mp 121–123 °C, 22 mg, 27% yield. <sup>1</sup>H NMR (400 MHz, CDCl<sub>3</sub>) δ 7.90 (d, *J* = 16.0 Hz, 1H), 7.66–7.60 (m, 3H), 7.52–7.50 (m, 2H), 7.45–7.44 (m, 3H), 7.36–7.34 (m, 3H), 7.08 (d, *J* = 15.8 Hz, 1H), 6.64 (d, *J* = 16.0 Hz, 1H), 3.87 (s, 3H), 3.76 (s, 3H); <sup>13</sup>C NMR (151 MHz, CDCl<sub>3</sub>) δ 164.4, 164.1, 163.5, 158.2, 148.1, 139.4, 135.1, 133.9, 131.2, 130.1, 129.2, 128.9, 128.6, 128.2, 119.4, 116.6, 115.8, 52.7, 52.7. HRMS (MALDI-Quadrupole-Orbitrap) *m/z*: [M + H]<sup>+</sup> Calcd for C<sub>23</sub>H<sub>20</sub>O<sub>6</sub>H<sup>+</sup> 393.1333; Found 393.1337. IR (KBr thin film, cm<sup>-1</sup>): ν 3082, 2985, 1731, 1582, 1168, 1052, 1006, 959, 741, 687.

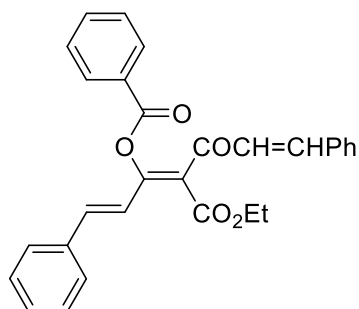

**3o**

**(1*E*,3*E*,6*E*)-4-(ethoxycarbonyl)-5-oxo-1,7-diphenylhepta-1,3,6-trien-3-yl benzoate (3o):** purified by flash chromatography on silica gel (petroleum ether/ethyl acetate, v:v = 5:1), yellow solid, mp 154–156 °C, 78 mg, 86% yield, 8:1 *E/Z*. <sup>1</sup>H NMR (400 MHz, CDCl<sub>3</sub>) δ 8.10 (d, *J* = 16.0 Hz, 1H), 8.06–8.03 (m, 2H), 7.62–7.48 (m, 6H), 7.46–7.42 (m, 2H), 7.38–7.34 (m, 6H), 7.01 (d, *J* = 16.0 Hz, 1H), 6.78 (d, *J* = 16.2 Hz, 1H), 4.31 (q, *J* = 7.2 Hz, 2H), 1.30 (t, *J* = 7.1 Hz, 3H); <sup>13</sup>C NMR (101 MHz, CDCl<sub>3</sub>) δ 190.6, 164.1, 163.7, 157.5, 146.1, 138.5, 135.3, 134.3, 134.1, 130.8, 130.4, 129.9, 128.9, 128.8, 128.7, 128.5, 128.2, 128.1, 126.6, 122.6, 119.6, 61.6, 14.2. HRMS (MALDI-Quadrupole-Orbitrap) *m/z*: [M + H]<sup>+</sup> Calcd for C<sub>29</sub>H<sub>24</sub>O<sub>5</sub>H<sup>+</sup> 453.1697; Found 453.1700. IR (KBr thin film, cm<sup>-1</sup>): ν 3023, 2924, 1731, 1581, 1484, 1168, 1052, 1006, 959, 741, 686.

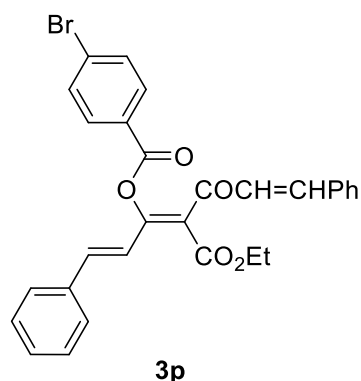

**(1E,3E,6E)-4-(ethoxycarbonyl)-5-oxo-1,7-diphenylhepta-1,3,6-trien-3-yl 4-bromobenzoate (3p):** purified by flash chromatography on silica gel (petroleum ether/ethyl acetate, v:v = 5:1), yellow solid, mp 174–176 °C, 69 mg, 65% yield, 4:1 *E/Z*. <sup>1</sup>H NMR (400 MHz, CDCl<sub>3</sub>) δ 8.08 (d, *J* = 16.0 Hz, 1H), 7.90 (d, *J* = 8.5 Hz, 2H), 7.60–7.48 (m, 7H), 7.39–7.34 (m, 6H), 6.98 (d, *J* = 16.0 Hz, 1H), 6.77 (d, *J* = 16.2 Hz, 1H), 4.32 (q, *J* = 7.2 Hz, 2H), 1.30 (t, *J* = 7.0 Hz, 3H); <sup>13</sup>C NMR (101 MHz, CDCl<sub>3</sub>) δ 190.4, 164.1, 163.0, 157.2, 146.1, 138.6, 135.2, 134.2, 132.1, 131.8, 130.8, 130.0, 129.5, 129.0, 128.9, 128.5, 128.1, 127.1, 126.4, 122.6, 119.4, 61.6, 14.2. HRMS (MALDI-Quadrupole-Orbitrap) *m/z*: [M + H]<sup>+</sup> Calcd for C<sub>29</sub>H<sub>23</sub>BrO<sub>5</sub>H<sup>+</sup> 531.0802; Found 531.0804. IR (KBr thin film, cm<sup>-1</sup>): ν 3023, 2924, 1731, 1581, 1484, 1168, 1052, 1006, 959, 741, 686.

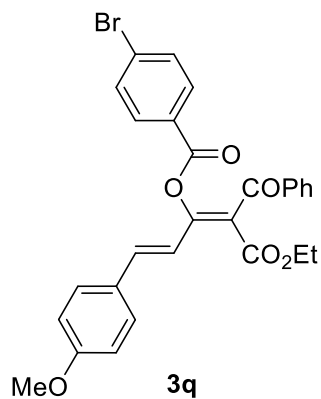

**(1E,3E)-5-ethoxy-4-(4-methoxybenzoyl)-1-(4-methoxyphenyl)-5-oxopenta-1,3-dien-3-yl 4-bromobenzoate (3q):** purified by flash chromatography on silica gel (petroleum ether/ethyl acetate, v:v = 5:1), yellow solid, mp 129–131 °C, 90 mg, 80% yield, 1:1 *E/Z*. <sup>1</sup>H NMR (600 MHz, CDCl<sub>3</sub>) δ 8.15–8.12 (m, 4H), 7.72–7.70 (m, 2H), 7.26–7.24 (m, 2H), 7.02–6.98 (m, 3H), 6.79–6.77 (m, 2H), 6.54 (d, *J* = 15.4 Hz, 1H), 4.01 (q, *J* = 7.1 Hz, 2H), 3.88 (s, 3H), 3.77 (s, 3H), 0.96 (t, *J* = 7.1 Hz, 3H); <sup>13</sup>C NMR (101 MHz, CDCl<sub>3</sub>) δ 191.0, 164.2, 163.6, 162.7, 161.1, 155.3, 137.8, 132.2, 131.9, 130.4, 129.6, 129.2, 128.0, 127.6, 120.8, 117.4, 114.3, 114.2, 61.0, 55.6, 55.3, 13.9. HRMS (MALDI-Quadrupole-Orbitrap) *m/z*: [M + H]<sup>+</sup> Calcd for C<sub>29</sub>H<sub>25</sub>BrO<sub>7</sub>H<sup>+</sup> 565.0856; Found 565.0859. IR (KBr thin film, cm<sup>-1</sup>): ν 3093, 3033, 2924, 1731, 1580,

1484, 1168, 1052, 1006, 959, 741, 686.

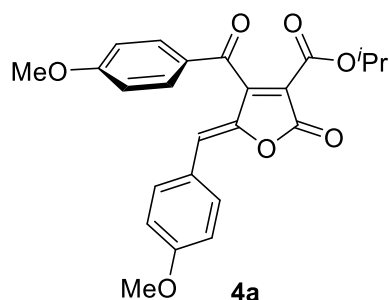

**isopropyl (Z)-4-(4-methoxybenzoyl)-5-(4-methoxybenzylidene)-2-oxo-2,5-dihydrofuran-3-carboxylate (4a):** purified by flash chromatography on silica gel (petroleum ether/ethyl acetate, v:v = 3:1), yellow solid, mp 172–174 °C, 61 mg, 72% yield.  $^1\text{H}$  NMR (400 MHz,  $\text{CDCl}_3$ )  $\delta$  7.90 (d,  $J$  = 8.4 Hz, 2H), 7.76 (d,  $J$  = 8.4 Hz, 2H), 6.99 (d,  $J$  = 8.4 Hz, 2H), 6.90 (d,  $J$  = 8.4 Hz, 2H), 6.09 (s, 1H), 5.00–4.94 (m, 1H), 3.89 (s, 3H), 3.84 (s, 3H), 0.97 (d,  $J$  = 6.3 Hz, 6H);  $^{13}\text{C}$  NMR (151 MHz,  $\text{CDCl}_3$ )  $\delta$  187.5, 165.1, 164.1, 162.0, 159.2, 158.7, 142.8, 134.1, 131.8, 128.6, 125.1, 120.2, 115.3, 114.7, 114.4, 69.6, 55.8, 55.5, 21.2. HRMS (MALDI-Quadrupole-Orbitrap)  $m/z$ :  $[\text{M} + \text{H}]^+$  Calcd for  $\text{C}_{24}\text{H}_{22}\text{O}_7\text{H}^+$  423.1438; Found 423.1442. IR (KBr thin film,  $\text{cm}^{-1}$ ):  $\nu$  3109, 2926, 1731, 1580, 1484, 1247, 1167, 1052, 1006, 959, 822, 741, 687.

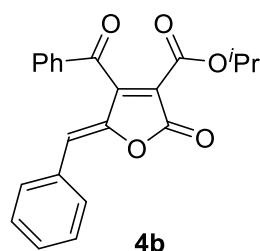

**isopropyl (Z)-4-benzoyl-5-benzylidene-2-oxo-2,5-dihydrofuran-3-carboxylate (4b):** purified by flash chromatography on silica gel (petroleum ether/ethyl acetate, v:v = 3:1), yellow solid, mp 154–156 °C, 31 mg, 43% yield.  $^1\text{H}$  NMR (400 MHz,  $\text{CDCl}_3$ )  $\delta$  7.95 (d,  $J$  = 7.4 Hz, 2H), 7.81–7.79 (m, 2H), 7.70 (t,  $J$  = 7.4 Hz, 1H), 7.55 (t,  $J$  = 7.8 Hz, 2H), 7.42–7.40 (m, 3H), 6.13 (s, 1H), 5.01–4.95 (m, 1H), 0.95 (d,  $J$  = 6.3 Hz, 6H);  $^{13}\text{C}$  NMR (101 MHz,  $\text{CDCl}_3$ )  $\delta$  187.9, 162.6, 157.7, 157.4, 143.1, 134.2, 134.1, 131.0, 130.9, 130.1, 128.3, 128.2, 128.1, 118.9, 116.2, 69.0, 20.1. HRMS (MALDI-Quadrupole-Orbitrap)  $m/z$ :  $[\text{M} + \text{H}]^+$  Calcd for  $\text{C}_{22}\text{H}_{18}\text{O}_5\text{H}^+$  363.1227; Found 363.1231. IR (KBr thin film,  $\text{cm}^{-1}$ ):  $\nu$  3057, 2977, 2941, 1784, 1719, 1680, 1569, 1384, 1283, 1176, 1103, 956, 784, 688.



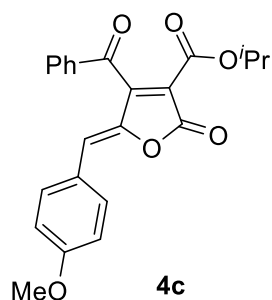

**isopropyl (Z)-4-benzoyl-5-(4-methoxybenzylidene)-2-oxo-2,5-dihydrofuran-3-carboxylate (4c):** purified by flash chromatography on silica gel (petroleum ether/ethyl acetate, v:v = 3:1), yellow solid, mp 133–135 °C, 53 mg, 68% yield. <sup>1</sup>H NMR (400 MHz, CDCl<sub>3</sub>) δ 7.94 (d, *J* = 7.6 Hz, 2H), 7.77 (d, *J* = 8.9 Hz, 2H), 7.68 (t, *J* = 7.4 Hz, 1H), 7.54 (t, *J* = 7.7 Hz, 2H), 6.91 (d, *J* = 8.9 Hz, 2H), 6.10 (s, 1H), 4.99–4.93 (m, 1H), 3.85 (s, 3H), 0.93 (d, *J* = 6.3 Hz, 6H); <sup>13</sup>C NMR (101 MHz, CDCl<sub>3</sub>) δ 189.3, 164.0, 162.1, 159.0, 158.2, 142.6, 135.4, 135.0, 134.1, 129.3, 129.1, 125.1, 120.4, 115.6, 114.8, 69.8, 55.5, 21.1. HRMS (MALDI-Quadrupole-Orbitrap) *m/z*: [M + H]<sup>+</sup> Calcd for C<sub>23</sub>H<sub>20</sub>O<sub>6</sub>H<sup>+</sup> 393.1333; Found 393.1335. IR (KBr thin film, cm<sup>-1</sup>): ν 3042, 2974, 2942, 2848, 1783, 1664, 1547, 1290, 1242, 1162, 1103, 829, 674.

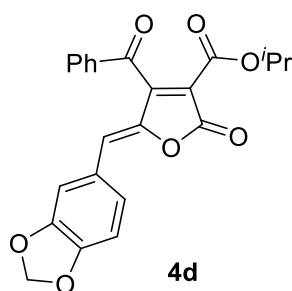

**isopropyl (Z)-5-(benzo[d][1,3]dioxol-5-ylmethylene)-4-benzoyl-2-oxo-2,5-dihydrofuran-3-carboxylate (4d):** purified by flash chromatography on silica gel (petroleum ether/ethyl acetate, v:v = 3:1), yellow solid, mp 122–124 °C, 69 mg, 85% yield. <sup>1</sup>H NMR (600 MHz, CDCl<sub>3</sub>) δ 7.95–7.93 (m, 2H), 7.69 (t, *J* = 7.4 Hz, 1H), 7.56–7.51 (m, 3H), 7.17 (dd, *J* = 8.5, 1.7 Hz, 1H), 6.81 (d, *J* = 8.2 Hz, 1H), 6.05 (s, 1H), 6.04 (s, 2H), 5.02–4.90 (m, 1H), 0.93 (d, *J* = 6.3 Hz, 6H); <sup>13</sup>C NMR (101 MHz, CDCl<sub>3</sub>) δ 189.2, 163.8, 159.0, 158.2, 150.6, 148.7, 142.8, 135.5, 135.1, 129.4, 129.2, 128.9, 126.7, 120.4, 115.9, 110.8, 109.0, 102.1, 77.3, 21.2. HRMS (MALDI-Quadrupole-Orbitrap) *m/z*: [M + H]<sup>+</sup> Calcd for C<sub>23</sub>H<sub>18</sub>O<sub>7</sub>H<sup>+</sup> 407.1125; Found 407.1129. IR (KBr thin film, cm<sup>-1</sup>): ν 3037, 2980, 2918, 2850, 1715, 1670, 1250, 1104, 1023, 960, 757.

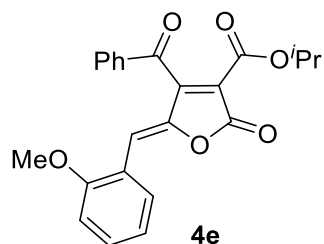

**isopropyl (Z)-4-benzoyl-5-(2-methoxybenzylidene)-2-oxo-2,5-dihydrofuran-3-carboxylate (4e):** purified by flash chromatography on silica gel (petroleum ether/ethyl acetate, v:v = 3:1), yellow solid, mp 145–147 °C, 36 mg, 46% yield. <sup>1</sup>H NMR (600 MHz, CDCl<sub>3</sub>) δ 8.29 (dd, *J* = 8.0, 1.7 Hz 1H), 7.96–7.94 (m, 2H), 7.70–7.66 (m, 1H), 7.56–7.52 (m, 2H), 7.39–7.36 (m, 1H), 7.04–7.02 (m, 1H), 6.85 (dd, *J* = 8.4, 0.9 Hz, 1H), 6.73 (s, 1H), 4.99–4.95 (m, 1H), 3.77 (s, 3H), 0.94 (d, *J* = 6.3 Hz, 6H); <sup>13</sup>C NMR (151 MHz, CDCl<sub>3</sub>) δ 189.2, 164.0, 159.1, 158.7, 158.6, 143.9, 135.6, 135.0, 133.0, 132.7, 129.4, 129.2, 121.4, 116.5, 114.4, 110.8, 69.9, 55.7, 21.2. HRMS (MALDI-Quadrupole-Orbitrap) *m/z*: [M + H]<sup>+</sup> Calcd for C<sub>23</sub>H<sub>20</sub>O<sub>6</sub>H<sup>+</sup> 393.1333; Found 393.1336. IR (KBr thin film, cm<sup>-1</sup>): ν 3069, 2986, 2936, 2836, 1781, 1670, 1558, 1254, 1164, 1106, 999, 759, 691.

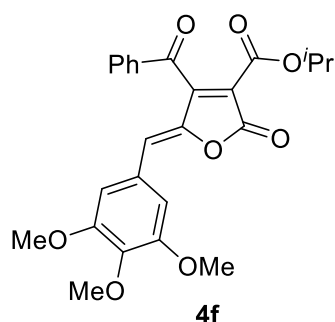

**isopropyl (Z)-4-benzoyl-2-oxo-5-(3,4,5-trimethoxybenzylidene)-2,5-dihydrofuran-3-carboxylate (4f):** purified by flash chromatography on silica gel (petroleum ether/ethyl acetate, v:v = 3:1), yellow solid, mp 118–120 °C, 47 mg, 52% yield. <sup>1</sup>H NMR (400 MHz, CDCl<sub>3</sub>) δ 7.95 (d, *J* = 7.6 Hz, 2H), 7.70 (t, *J* = 7.4 Hz, 1H), 7.55 (t, *J* = 7.7 Hz, 2H), 7.04 (s, 2H), 6.04 (s, 1H), 5.00–4.93 (m, 1H), 3.91 (s, 3H), 3.88 (s, 6H), 0.93 (d, *J* = 6.2 Hz, 6H); <sup>13</sup>C NMR (151 MHz, CDCl<sub>3</sub>) δ 189.2, 163.6, 158.9, 158.2, 153.4, 143.6, 141.3, 135.4, 135.2, 129.4, 129.3, 127.5, 120.2, 116.4, 109.4, 70.0, 61.2, 56.4, 21.2. HRMS (MALDI-Quadrupole-Orbitrap) *m/z*: [M + H]<sup>+</sup> Calcd for C<sub>25</sub>H<sub>24</sub>O<sub>8</sub>H<sup>+</sup> 453.1544; Found 453.1545. IR (KBr thin film, cm<sup>-1</sup>): ν 3037, 2985, 2936, 2843, 1795, 1706, 1568, 1282, 1125, 1099, 991, 696.

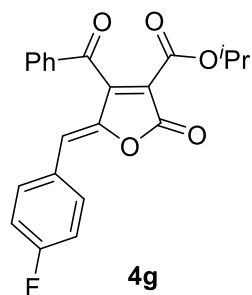

**isopropyl (Z)-4-benzoyl-5-(4-fluorobenzylidene)-2-oxo-2,5-dihydrofuran-3-carboxylate (4g):** purified by flash chromatography on silica gel (petroleum ether/ethyl acetate, v:v = 3:1), yellow solid, mp 161–163 °C, 40 mg, 53% yield. <sup>1</sup>H NMR (400 MHz, CDCl<sub>3</sub>) δ 7.94 (d, *J* = 7.4 Hz, 2H), 7.80 (dd, *J* = 8.8, 5.5 Hz, 2H), 7.70 (t, *J* = 7.4 Hz, 1H), 7.55 (t, *J* = 7.8 Hz, 2H), 7.09 (t, *J* = 8.6 Hz, 2H), 6.09 (s, 1H), 5.00–4.94 (m, 1H), 0.94 (d, *J* = 6.2 Hz, 6H); <sup>13</sup>C NMR (151 MHz, CDCl<sub>3</sub>) δ 189.0, 164.1 (d, *J* = 255.0 Hz), 163.6, 158.8, 158.4, 143.8, 135.3, 134.1 (d, *J* = 8.7 Hz), 129.4, 129.3, 128.5 (d, *J* = 3.6 Hz), 118.6, 117.1, 116.6, 116.5, 70.2, 21.2. HRMS (MALDI-Quadrupole-Orbitrap) *m/z*: [M + H]<sup>+</sup> Calcd for C<sub>22</sub>H<sub>17</sub>FO<sub>5</sub>H<sup>+</sup> 381.1133; Found 381.1136. IR (KBr thin film, cm<sup>-1</sup>): ν 3056, 2977, 2939, 2851, 1787, 1672, 1573, 1234, 1159, 1102, 998, 692.

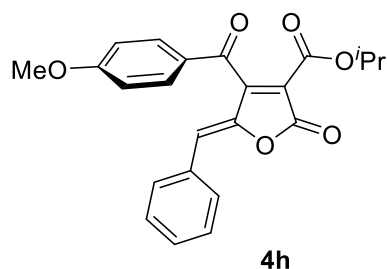

**isopropyl (Z)-5-benzylidene-4-(4-methoxybenzoyl)-2-oxo-2,5-dihydrofuran-3-carboxylate (4h):** purified by flash chromatography on silica gel (petroleum ether/ethyl acetate, v:v = 3:1), yellow solid, mp 127–129 °C, 42 mg, 54% yield. <sup>1</sup>H NMR (400 MHz, CDCl<sub>3</sub>) δ 7.91 (d, *J* = 8.7 Hz, 2H), 7.80–7.77 (m, 2H), 7.44–7.36 (m, 3H), 7.00 (d, *J* = 8.6 Hz, 2H), 6.12 (s, 1H), 5.02–4.94 (m, 1H), 3.90 (s, 3H), 0.99 (d, *J* = 6.1 Hz, 6H); <sup>13</sup>C NMR (101 MHz, CDCl<sub>3</sub>) δ 187.2, 165.2, 163.8, 158.9, 158.9, 144.3, 132.1, 131.8, 131.0, 129.1, 128.5, 119.8, 116.9, 114.5, 69.9, 55.8, 21.2. HRMS (MALDI-Quadrupole-Orbitrap) *m/z*: [M + H]<sup>+</sup> Calcd for C<sub>23</sub>H<sub>20</sub>O<sub>6</sub>H<sup>+</sup> 393.1333; Found 393.1338. IR (KBr thin film, cm<sup>-1</sup>): ν 3064, 2984, 2943, 2837, 1790, 1596, 1570, 1249, 1168, 1100, 994, 680.

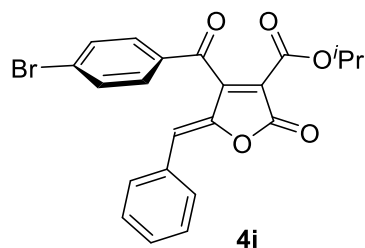

**isopropyl (Z)-5-benzylidene-4-(4-bromobenzoyl)-2-oxo-2,5-dihydrofuran-3-carboxylate (4i):** purified by flash chromatography on silica gel (petroleum ether/ethyl acetate, v:v = 3:1), yellow solid, mp 186–188 °C, 51 mg, 58% yield. <sup>1</sup>H NMR (400 MHz, CDCl<sub>3</sub>) δ 7.86–7.76 (m, 4H), 7.74–7.66 (m, 2H), 7.45–7.38 (m, 3H), 6.09 (s, 1H), 5.04–4.96 (m, 1H), 1.01 (d, *J* = 6.3 Hz, 6H); <sup>13</sup>C NMR (101 MHz, CDCl<sub>3</sub>) δ 188.0, 163.3, 158.7, 158.0, 144.0, 134.0, 132.6, 131.9, 131.2, 130.7, 130.6, 129.1, 120.1, 117.4, 70.2, 21.3. HRMS (MALDI-Quadrupole-Orbitrap) *m/z*: [M + H]<sup>+</sup> Calcd for C<sub>22</sub>H<sub>17</sub>BrO<sub>5</sub>H<sup>+</sup> 441.0332; Found 441.0338. IR (KBr thin film, cm<sup>-1</sup>): ν 3057, 2977, 2923, 2857, 1783, 1663, 1567, 1286, 1173, 1105, 998, 759, 673.

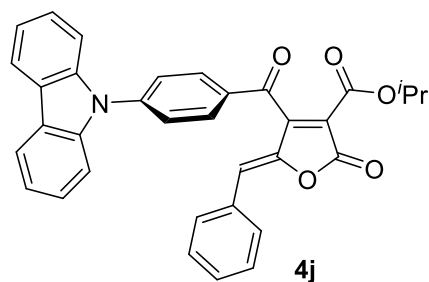

**isopropyl (Z)-4-(4-(9H-carbazol-9-yl)benzoyl)-5-benzylidene-2-oxo-2,5-dihydrofuran-3-carboxylate compound with methane (1:1) (4j):** purified by flash chromatography on silica gel (petroleum ether/ethyl acetate, v:v = 3:1), yellow solid, mp 173–175 °C, 44 mg, 40% yield. <sup>1</sup>H NMR (400 MHz, CDCl<sub>3</sub>) δ 8.21 (d, *J* = 8.4 Hz, 2H), 8.15 (d, *J* = 7.7 Hz, 2H), 7.89–7.79 (m, 4H), 7.52–7.49 (m, 2H), 7.48–7.40 (m, 5H), 7.34 (t, *J* = 7.4 Hz, 2H), 6.24 (s, 1H), 5.11–5.05 (m, 1H), 1.08 (d, *J* = 6.2 Hz, 6H); <sup>13</sup>C NMR (101 MHz, CDCl<sub>3</sub>) δ 187.7, 163.5, 158.9, 158.3, 144.1, 139.8, 133.3, 132.0, 132.0, 131.2, 131.1, 129.2, 126.7, 126.4, 124.2, 121.1, 120.6, 120.1, 117.4, 109.7, 70.1, 21.3. HRMS (MALDI-Quadrupole-Orbitrap) *m/z*: [M + H]<sup>+</sup> Calcd for C<sub>34</sub>H<sub>25</sub>NO<sub>5</sub>H<sup>+</sup> 528.1805; Found 528.1811. IR (KBr thin film, cm<sup>-1</sup>): ν 3051, 2987, 2937, 2853, 1796, 1596, 1449, 1288, 1168, 1099, 992, 751.

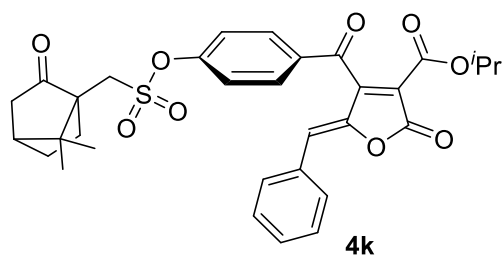

**isopropyl (Z)-5-benzylidene-4-(4-(((7,7-dimethyl-2-oxobicyclo[2.2.1]heptan-1-yl)methyl)sulfonyl)oxy)benzoyl)-2-oxo-2,5-dihydrofuran-3-carboxylate (4k):** purified by flash chromatography on silica gel (petroleum ether/ethyl acetate, v:v = 3:1), yellow liquid, 53 mg, 45% yield.  $^1\text{H}$  NMR (400 MHz,  $\text{CDCl}_3$ )  $\delta$  7.95 (d,  $J = 8.7$  Hz, 2H), 7.76–7.73 (m, 2H), 7.43 (d,  $J = 8.7$  Hz, 2H), 7.37–7.31 (m, 3H), 6.05 (s, 1H), 4.97–4.90 (m, 1H), 3.79 (d,  $J = 15.0$  Hz, 1H), 3.19 (d,  $J = 15.0$  Hz, 1H), 2.51–2.41 (m, 1H), 2.37 (dt,  $J = 18.6, 4.1$  Hz, 1H), 2.10 (t,  $J = 4.4$  Hz, 1H), 2.08–2.00 (m, 1H), 1.93 (d,  $J = 18.6$  Hz, 1H), 1.72–1.64 (m, 1H), 1.45–1.38 (m, 1H), 1.09 (s, 3H), 0.93 (d,  $J = 6.3$  Hz, 6H), 0.85 (s, 3H);  $^{13}\text{C}$  NMR (151 MHz,  $\text{CDCl}_3$ )  $\delta$  213.9, 187.7, 163.4, 158.79, 158.0, 154.0, 144.0, 133.8, 132.1, 132.0, 131.4, 131.3, 129.2, 122.9, 120.3, 117.4, 70.4, 58.2, 48.7, 48.2, 42.9, 42.5, 29.8, 27.0, 25.2, 21.3, 20.0, 19.8. HRMS (MALDI-Quadrupole-Orbitrap)  $m/z$ :  $[\text{M} + \text{H}]^+$  Calcd for  $\text{C}_{32}\text{H}_{32}\text{O}_9\text{SH}^+$  593.1840; Found 593.1843. IR (KBr thin film,  $\text{cm}^{-1}$ ):  $\nu$  2961, 2923, 2853, 1786, 1595, 1374, 1148, 1006, 865, 788, 696.

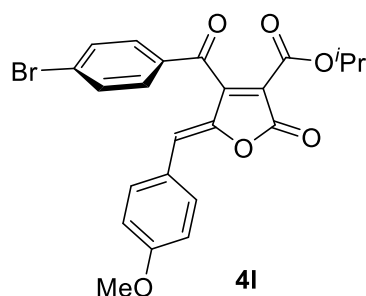

**isopropyl (Z)-4-(4-bromobenzoyl)-5-(4-methoxybenzylidene)-2-oxo-2,5-dihydrofuran-3-carboxylate (4l):** purified by flash chromatography on silica gel (petroleum ether/ethyl acetate, v:v = 3:1), yellow solid, mp 212–214  $^{\circ}\text{C}$ , 57 mg, 60% yield.  $^1\text{H}$  NMR (600 MHz,  $\text{CDCl}_3$ )  $\delta$  7.81 (d,  $J = 8.6$  Hz, 2H), 7.77 (d,  $J = 8.9$  Hz, 2H), 7.69 (d,  $J = 8.6$  Hz, 2H), 6.92 (d,  $J = 8.7$  Hz, 2H), 6.06 (s, 1H), 5.01–4.97 (m, 1H), 3.86 (s, 3H), 0.99 (d,  $J = 6.2$  Hz, 6H);  $^{13}\text{C}$  NMR (151 MHz,  $\text{CDCl}_3$ )  $\delta$  188.4, 163.8, 162.4, 159.1, 157.8, 142.5, 134.3, 132.6, 130.7, 125.1, 120.6, 115.8, 114.9, 70.0, 55.6, 21.4. HRMS (MALDI-Quadrupole-Orbitrap)  $m/z$ :  $[\text{M} + \text{H}]^+$  Calcd for  $\text{C}_{23}\text{H}_{19}\text{BrO}_6\text{H}^+$  471.0438; Found 471.0440. IR (KBr thin film,  $\text{cm}^{-1}$ ):  $\nu$  2969, 2923, 2823, 1782, 16775, 1583, 1374, 1286, 1148, 1103, 1004, 869, 786.

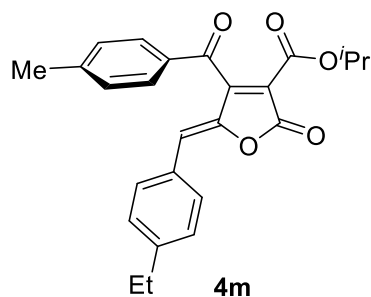

**isopropyl (Z)-4-benzoyl-2-oxo-5-(3,4,5-trimethoxybenzylidene)-2,5-dihydrofuran-3-carboxylate (4m):** purified by flash chromatography on silica gel (petroleum ether/ethyl acetate, v:v = 3:1), yellow solid, mp 105–107 °C, 50 mg, 62% yield. <sup>1</sup>H NMR (400 MHz, CDCl<sub>3</sub>) δ 7.83 (d, *J* = 8.1 Hz, 2H), 7.71 (d, *J* = 8.1 Hz, 2H), 7.33 (d, *J* = 8.0 Hz, 2H), 7.23 (d, *J* = 8.1 Hz, 2H), 6.10 (s, 1H), 5.01–4.94 (m, 1H), 2.66 (q, *J* = 7.6 Hz, 2H), 2.45 (s, 3H), 1.23 (t, *J* = 7.6 Hz, 3H), 0.96 (d, *J* = 6.3 Hz, 6H); <sup>13</sup>C NMR (101 MHz, CDCl<sub>3</sub>) δ 188.6, 163.9, 159.0, 158.7, 148.3, 146.5, 143.7, 133.0, 132.1, 129.8, 129.7, 129.5, 128.7, 120.3, 116.4, 69.8, 29.0, 22.0, 21.2, 15.1. HRMS (MALDI-Quadrupole-Orbitrap) *m/z*: [M + H]<sup>+</sup> Calcd for C<sub>25</sub>H<sub>24</sub>O<sub>5</sub>H<sup>+</sup> 405.1697; Found 405.1699. IR (KBr thin film, cm<sup>-1</sup>): ν 3045, 2963, 2931, 2871, 1797, 1669, 1576, 1287, 1175, 1108, 998, 827, 775.

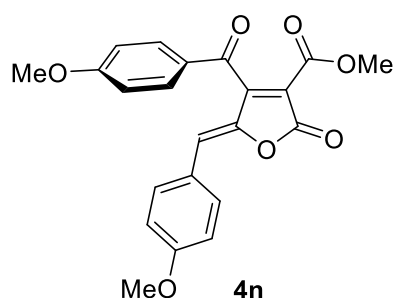

**methyl (Z)-4-(4-methoxybenzoyl)-5-(4-methoxybenzylidene)-2-oxo-2,5-dihydrofuran-3-carboxylate (4n):** purified by flash chromatography on silica gel (petroleum ether/ethyl acetate, v:v = 3:1), yellow solid, mp 187–189 °C, 49 mg, 62% yield. <sup>1</sup>H NMR (400 MHz, CDCl<sub>3</sub>) δ 7.90 (d, *J* = 8.7 Hz, 2H), 7.76 (d, *J* = 8.8 Hz, 2H), 6.99 (d, *J* = 8.7 Hz, 2H), 6.91 (d, *J* = 8.8 Hz, 2H), 6.10 (s, 1H), 3.89 (s, 3H), 3.85 (s, 3H), 3.71 (s, 3H); <sup>13</sup>C NMR (101 MHz, CDCl<sub>3</sub>) δ 187.5, 165.1, 164.0, 162.2, 160.5, 160.2, 142.9, 134.2, 131.8, 128.3, 125.0, 120.7, 115.1, 114.8, 114.5, 55.7, 55.5, 52.6. HRMS (MALDI-Quadrupole-Orbitrap) *m/z*: [M + H]<sup>+</sup> Calcd for C<sub>22</sub>H<sub>18</sub>O<sub>7</sub>H<sup>+</sup> 395.1125; Found 395.1129. IR (KBr thin film, cm<sup>-1</sup>): ν 2959, 2920, 2849, 1667, 1599, 1509, 1251, 1163, 1020, 832, 773.

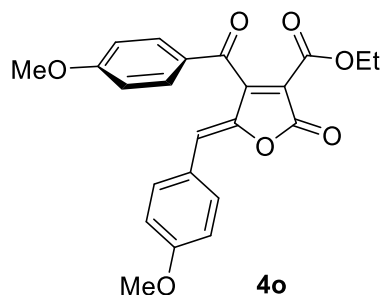

**ethyl (Z)-4-(4-methoxybenzoyl)-5-(4-methoxybenzylidene)-2-oxo-2,5-dihydrofuran-3-carboxylate (4o):** purified by flash chromatography on silica gel (petroleum ether/ethyl acetate, v:v = 3:1), yellow solid, mp 180–182 °C, 56 mg, 71%

yield.  $^1\text{H}$  NMR (400 MHz,  $\text{CDCl}_3$ )  $\delta$  7.90 (d,  $J = 8.8$  Hz, 2H), 7.76 (d,  $J = 8.9$  Hz, 2H), 6.99 (d,  $J = 8.9$  Hz, 2H), 6.91 (d,  $J = 8.9$  Hz, 2H), 6.10 (s, 1H), 4.13 (q,  $J = 7.1$  Hz, 2H), 3.89 (s, 3H), 3.85 (s, 3H), 1.03 (t,  $J = 7.1$  Hz, 3H);  $^{13}\text{C}$  NMR (101 MHz,  $\text{CDCl}_3$ )  $\delta$  187.5, 165.1, 164.1, 162.1, 159.8, 159.4, 142.8, 134.1, 131.8, 128.5, 125.1, 120.4, 115.2, 114.7, 114.4, 61.7, 55.7, 55.5, 13.7. HRMS (MALDI-Quadrupole-Orbitrap)  $m/z$ :  $[\text{M} + \text{H}]^+$  Calcd for  $\text{C}_{23}\text{H}_{20}\text{O}_7\text{H}^+$  409.1282; Found 409.1286. IR (KBr thin film,  $\text{cm}^{-1}$ ):  $\nu$  3043, 2989, 2921, 2845, 1783, 1600, 1553, 1510, 1248, 1164, 1018, 831, 801.

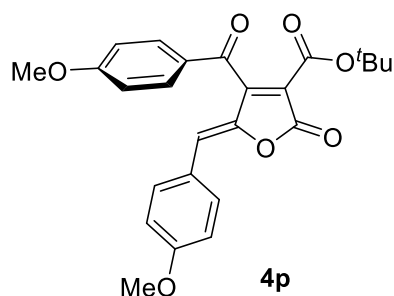

**tert-butyl (Z)-4-(4-methoxybenzoyl)-5-(4-methoxybenzylidene)-2-oxo-2,5-dihydrofuran-3-carboxylate (4p):** purified by flash chromatography on silica gel (petroleum ether/ethyl acetate, v:v = 3:1), yellow solid, mp 204–206  $^{\circ}\text{C}$ , 56 mg, 64% yield.  $^1\text{H}$  NMR (400 MHz,  $\text{CDCl}_3$ )  $\delta$  7.91 (d,  $J = 8.6$  Hz, 2H), 7.75 (d,  $J = 8.7$  Hz, 2H), 7.00 (d,  $J = 8.6$  Hz, 2H), 6.90 (d,  $J = 8.7$  Hz, 2H), 6.06 (s, 1H), 3.90 (s, 3H), 3.84 (s, 3H), 1.21 (s, 9H);  $^{13}\text{C}$  NMR (101 MHz,  $\text{CDCl}_3$ )  $\delta$  187.5, 165.1, 164.4, 161.9, 158.7, 157.8, 142.7, 133.9, 131.9, 128.6, 125.2, 119.8, 116.2, 114.7, 114.4, 83.4, 55.8, 55.5, 27.6; HRMS (MALDI-Quadrupole-Orbitrap)  $m/z$ :  $[\text{M} + \text{H}]^+$  Calcd for  $\text{C}_{25}\text{H}_{24}\text{O}_7\text{H}^+$  437.1595; Found 437.1596. IR (KBr thin film,  $\text{cm}^{-1}$ ):  $\nu$  3042, 2991, 2924, 2849, 1778, 1552, 1378, 1247, 1145, 1006, 969, 829, 576.

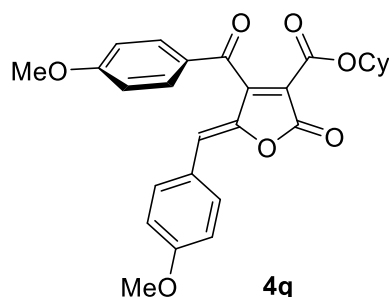

**cyclohexyl (Z)-4-(4-methoxybenzoyl)-5-(4-methoxybenzylidene)-2-oxo-2,5-dihydrofuran-3-carboxylate (4q):** purified by flash chromatography on silica gel (petroleum ether/ethyl acetate, v:v = 3:1), yellow solid, mp 150–152  $^{\circ}\text{C}$ , 62 mg, 67% yield.  $^1\text{H}$  NMR (400 MHz,  $\text{CDCl}_3$ )  $\delta$  7.92 (d,  $J = 8.7$  Hz, 2H), 7.77 (d,  $J = 8.8$  Hz, 2H), 7.00 (d,  $J = 8.7$  Hz, 2H), 6.91 (d,  $J = 8.8$  Hz, 2H), 6.08 (s, 1H), 4.84–4.78 (m, 1H), 3.91 (s, 3H), 3.86 (s, 3H), 1.61–1.57 (m, 2H), 1.52–1.43 (m, 2H), 1.42–1.38 (m, 1H), 1.28–1.10 (m, 5H);  $^{13}\text{C}$  NMR (101 MHz,  $\text{CDCl}_3$ )  $\delta$  187.5, 165.1, 164.1, 162.0, 159.2,

158.6, 142.8, 134.0, 131.9, 128.5, 125.1, 120.1, 115.5, 114.7, 114.4, 74.3, 55.8, 55.5, 30.9, 25.2, 23.2. HRMS (MALDI-Quadrupole-Orbitrap)  $m/z$ :  $[M + H]^+$  Calcd for  $C_{27}H_{26}O_7H^+$  463.1751; Found 463.1757. IR (KBr thin film,  $cm^{-1}$ ):  $\nu$  2931, 2849, 1773, 1599, 1553, 1509, 1250, 1162, 997, 828.

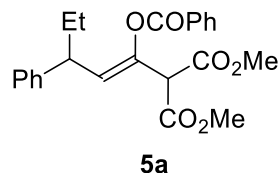

**dimethyl (Z)-2-(1-(benzyloxy)-3-phenylpent-1-en-1-yl)malonate (5a)**: purified by flash chromatography on silica gel (petroleum ether/ethyl acetate, v:v = 5:1), colorless oil, 33 mg, 82% yield.  $^1H$  NMR (400 MHz,  $CDCl_3$ )  $\delta$  8.11–8.03 (m, 2H), 7.63 (t,  $J$  = 7.4 Hz, 1H), 7.49 (t,  $J$  = 7.8 Hz, 2H), 7.31–7.25 (m, 2H), 7.20 (d,  $J$  = 7.6 Hz, 3H), 5.74 (d,  $J$  = 9.7 Hz, 1H), 4.39 (s, 1H), 3.77 (s, 3H), 3.76 (s, 3H), 3.55–3.40 (m, 1H), 1.92–1.67 (m, 2H), 0.92 (t,  $J$  = 7.4 Hz, 3H);  $^{13}C$  NMR (101 MHz,  $CDCl_3$ )  $\delta$  166.8, 166.8, 164.3, 143.3, 139.3, 133.6, 130.1, 129.0, 128.6, 128.4, 127.5, 127.0, 126.3, 56.1, 53.0, 53.0, 44.0, 29.1, 12.0. HRMS (MALDI-Quadrupole-Orbitrap)  $m/z$ :  $[M + Na]^+$  Calcd for  $C_{23}H_{24}O_6Na^+$  419.1465; Found 419.1463. IR (KBr thin film,  $cm^{-1}$ ):  $\nu$  2963, 2921, 2834, 1735, 1430, 1260, 1238, 1162, 1064, 1023, 704.

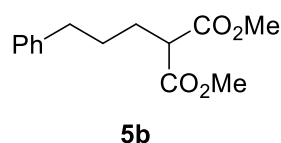

**dimethyl 2-(3-phenylpropyl)malonate (5b)**<sup>[5]</sup>: purified by flash chromatography on silica gel (petroleum ether/ethyl acetate, v:v = 10:1), colorless oil, 38 mg, 62% yield.  $^1H$  NMR (600 MHz,  $CDCl_3$ )  $\delta$  7.30–7.26 (m, 2H), 7.20–7.15 (m, 3H), 3.73 (s, 6H), 3.38 (t,  $J$  = 7.6 Hz, 1H), 2.64 (t,  $J$  = 7.5 Hz, 2H), 2.00–1.89 (m, 2H), 1.68–1.62 (m, 2H);  $^{13}C$  NMR (101 MHz,  $CDCl_3$ )  $\delta$  169.8, 141.6, 128.4, 128.4, 125.9, 52.5, 51.6, 35.5, 29.1, 28.5. HRMS (MALDI-Quadrupole-Orbitrap)  $m/z$ :  $[M + Na]^+$  Calcd for  $C_{14}H_{18}O_4Na^+$  273.1097; Found 273.1104. IR (KBr thin film,  $cm^{-1}$ ):  $\nu$  1603, 1496, 1453, 1435, 1343, 1197, 1144, 1056, 1003, 914, 806, 748, 699.

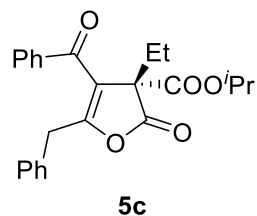

**isopropyl 4-benzoyl-5-benzyl-3-ethyl-2-oxo-2,3-dihydrofuran-3-carboxylate (5c)**: purified by flash chromatography on silica gel (petroleum ether/ethyl acetate, v:v = 10:1), colorless oil, 21 mg, 53% yield.  $^1H$  NMR (400 MHz,  $CDCl_3$ )  $\delta$  7.79–7.73 (m,



2H), 7.65–7.58 (m, 1H), 7.49 (t,  $J = 7.8$  Hz, 2H), 7.30–7.22 (m, 3H), 7.06–7.03 (m, 2H), 5.11–5.03 (m, 1H), 3.65 (d,  $J = 15.4$  Hz, 1H), 3.57 (d,  $J = 15.4$  Hz, 1H), 2.44–2.24 (m, 2H), 1.21–1.13 (m, 6H), 0.90 (t,  $J = 7.5$  Hz, 3H);  $^{13}\text{C}$  NMR (101 MHz,  $\text{CDCl}_3$ )  $\delta$  190.2, 172.4, 166.0, 162.0, 138.7, 134.3, 133.3, 129.0, 128.8, 128.8, 128.7, 127.4, 119.2, 70.4, 62.6, 34.5, 25.8, 21.5, 9.1. HRMS (MALDI-Quadrupole-Orbitrap)  $m/z$ :  $[\text{M} + \text{H}]^+$  Calcd for  $\text{C}_{24}\text{H}_{24}\text{O}_5\text{H}^+$  393.1697; Found 393.1693. IR (KBr thin film,  $\text{cm}^{-1}$ ):  $\nu$  2979, 2935, 2360, 1809, 1743, 1635, 1352, 1226, 1104, 1066, 939, 696.

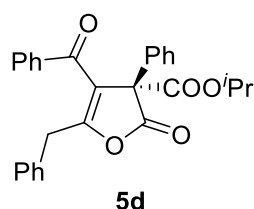

**isopropyl 5-ethyl-2-oxo-5-phenyl-4-(2-phenylacetyl)-2,5-dihydrofuran-3-carboxylate (5d)**: purified by flash chromatography on silica gel (petroleum ether/ethyl acetate, v:v = 10:1), white solid, mp 152–154 °C, 47 mg, 71% yield.  $^1\text{H}$  NMR (600 MHz,  $\text{CDCl}_3$ )  $\delta$  7.84–7.78 (m, 2H), 7.66–7.60 (m, 1H), 7.54–7.47 (m, 4H), 7.39–7.32 (m, 3H), 7.32–7.19 (m, 3H), 7.12–7.00 (m, 2H), 5.20–5.12 (m, 1H), 3.74 (d,  $J = 15.4$  Hz, 1H), 3.60 (d,  $J = 15.4$  Hz, 1H), 1.22 (d,  $J = 6.3$  Hz, 3H), 1.17 (d,  $J = 6.3$  Hz, 3H);  $^{13}\text{C}$  NMR (151 MHz,  $\text{CDCl}_3$ )  $\delta$  189.8, 171.0, 165.5, 161.8, 138.3, 134.1, 133.5, 133.2, 129.1, 129.0, 128.9, 128.7, 128.6, 128.4, 127.5, 121.0, 71.0, 65.1, 34.5, 21.5, 21.4. HRMS (MALDI-Quadrupole-Orbitrap)  $m/z$ :  $[\text{M} + \text{Na}]^+$  Calcd for  $\text{C}_{28}\text{H}_{24}\text{O}_5\text{Na}^+$  463.1516; Found 463.1516. IR (KBr thin film,  $\text{cm}^{-1}$ ):  $\nu$  2984, 1797, 1744, 1639, 1449, 1328, 1211, 1142, 1101, 973, 699, 663.

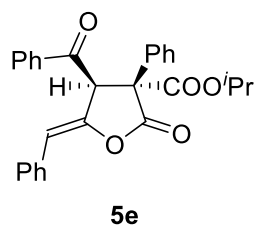

**carboxylate (5e)**: purified by flash chromatography on silica gel (petroleum ether/ethyl acetate, v:v = 10:1), white solid, mp 156–158 °C, 47 mg, 53% yield, 3:1 dr.  $^1\text{H}$  NMR (400 MHz,  $\text{CDCl}_3$ )  $\delta$  7.96–7.92 (m, 2H), 7.64–7.59 (m, 3H), 7.58–7.54 (m, 2H), 7.48 (t,  $J = 7.8$  Hz, 2H), 7.32 (t,  $J = 7.7$  Hz, 2H), 7.25–7.18 (m, 4H), 5.95 (s, 1H), 5.68 (s, 1H), 5.09–5.00 (m, 1H), 1.20 (d,  $J = 6.3$  Hz, 3H), 1.12 (d,  $J = 6.2$  Hz, 3H);  $^{13}\text{C}$  NMR (101 MHz,  $\text{CDCl}_3$ )  $\delta$  193.6, 168.7, 166.6, 142.8, 135.4, 134.3, 133.1, 132.5, 129.1, 128.9, 128.7, 128.6, 128.3, 127.6, 127.5, 108.2, 71.9, 62.2, 55.4, 21.4, 21.1. HRMS (MALDI-Quadrupole-Orbitrap)  $m/z$ :  $[\text{M} + \text{Na}]^+$  Calcd for  $\text{C}_{28}\text{H}_{24}\text{O}_5\text{Na}^+$  463.1516; Found 463.1509. IR (KBr thin film,  $\text{cm}^{-1}$ ):  $\nu$  2984, 1805, 1728, 1670, 1447, 1222, 1081, 976, 686.

## VII. $^1\text{H}$ NMR and $^{13}\text{C}$ NMR spectra of substrates and products

c120210511-s. 1. F1d

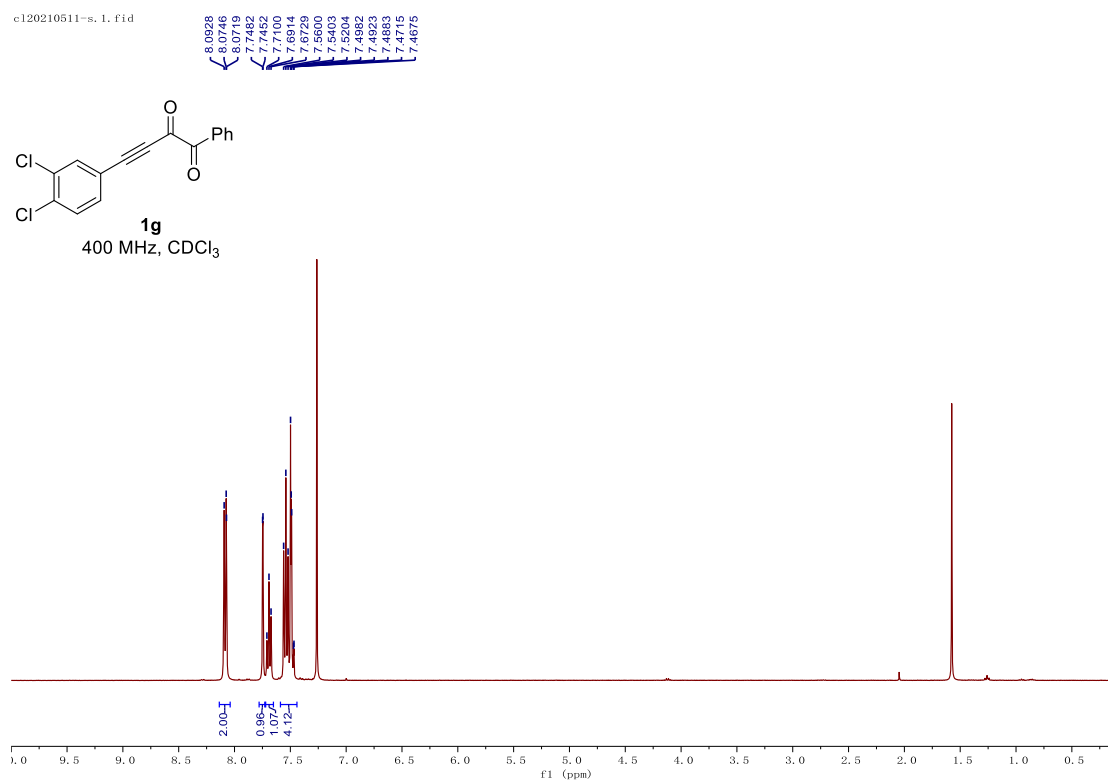

c1210511-S-1  
single pulse decoupled

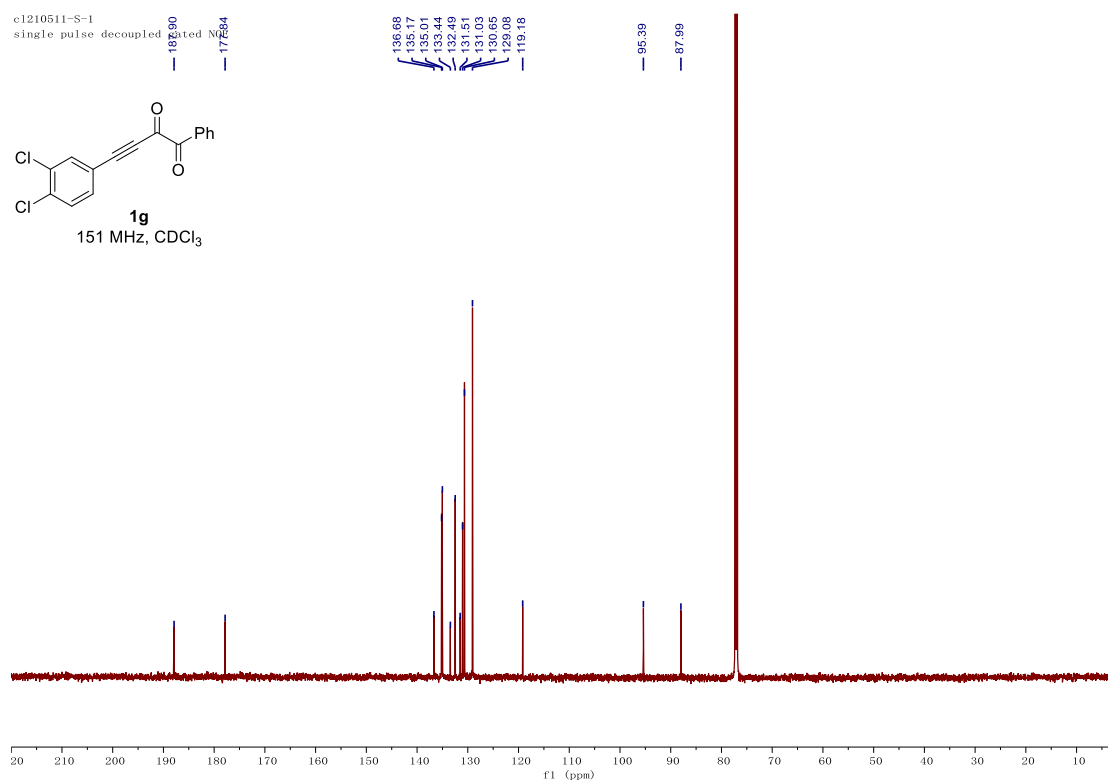

c120210731-s.p. 1. fid

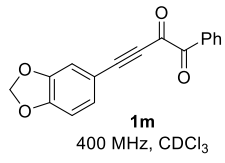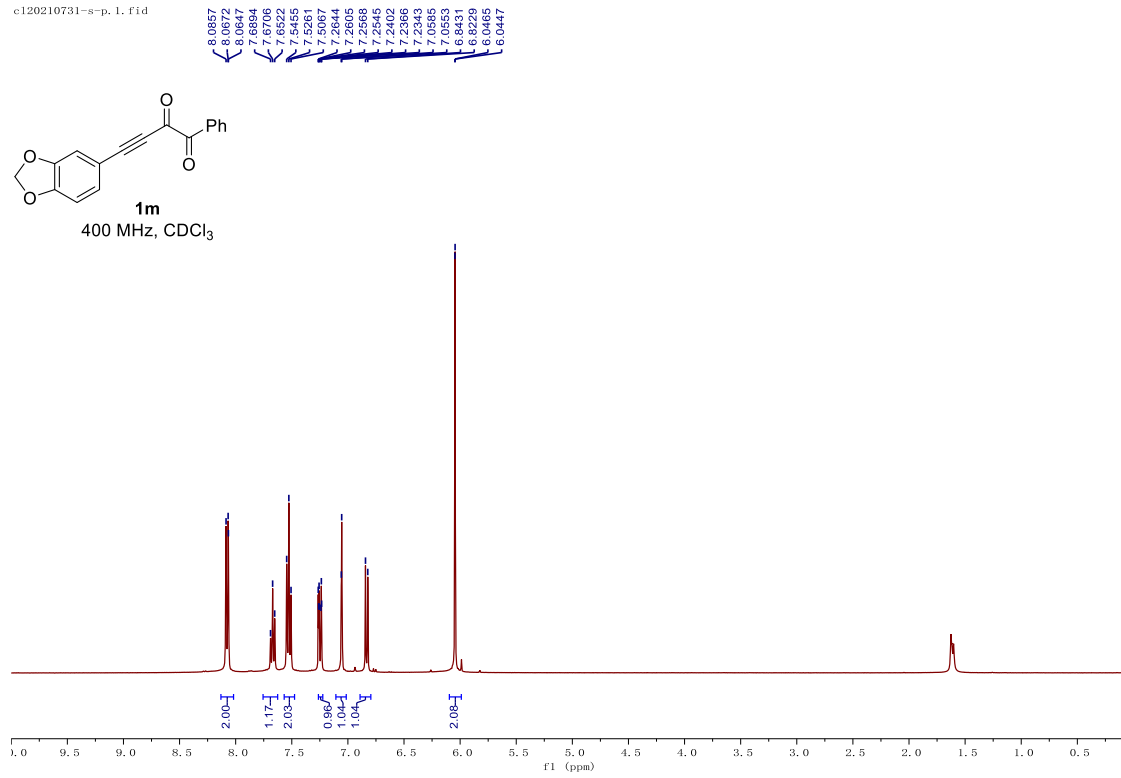

c120210809-s. 1. fid

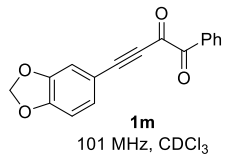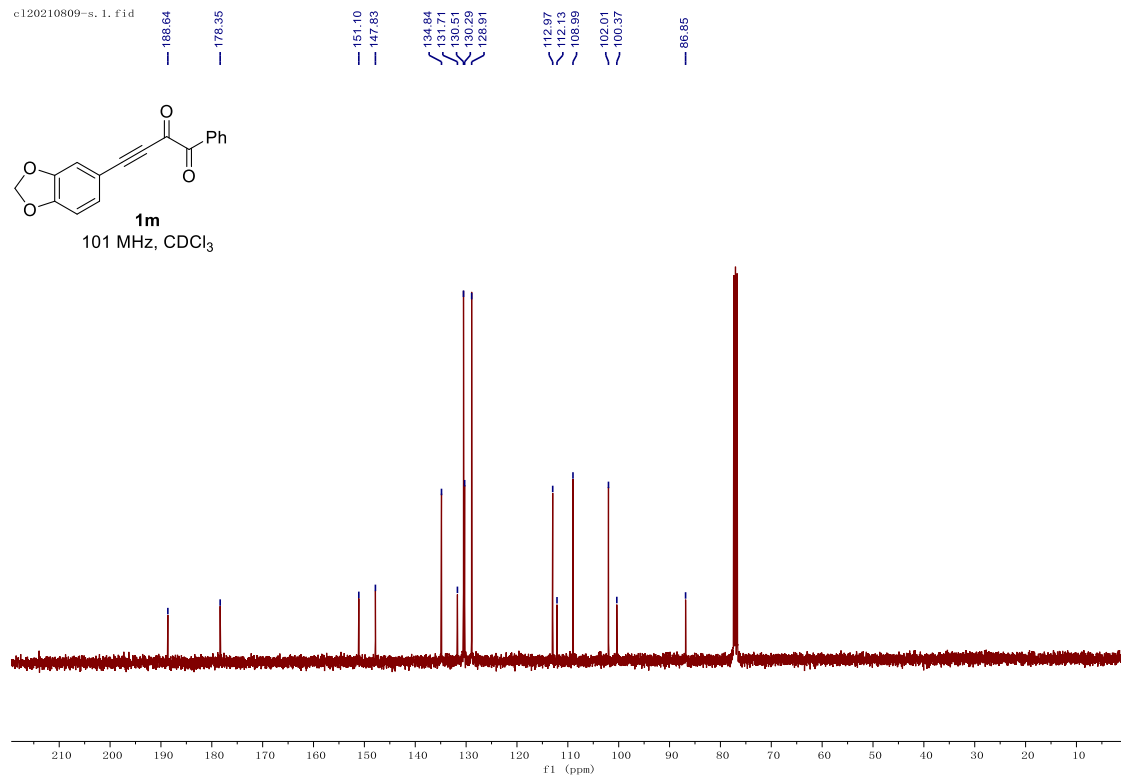

c120210817-s, 1, fid

8.0990  
8.0794  
7.6832  
7.6649  
7.6463  
7.5801  
7.5610  
7.5227  
7.5037  
7.4839  
7.4641  
7.4441  
6.9820  
6.9622  
6.9442  
6.9291  
6.9079

3.8973  
3.8923

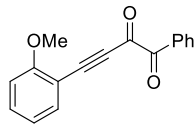

**1n**  
400 MHz, CDCl<sub>3</sub>

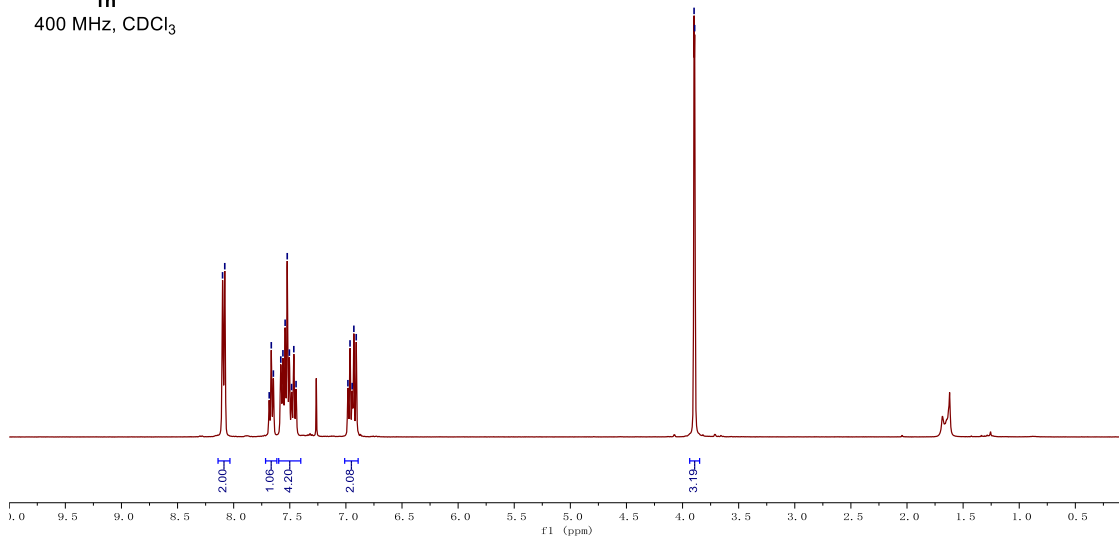

c120210817-s, 2, fid

188.69  
176.61  
162.21

135.59  
134.75  
133.66  
131.79  
130.53  
128.86

120.69  
110.99  
108.45

97.08  
91.31

55.93

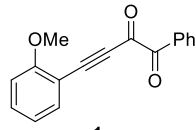

**1n**  
101 MHz, CDCl<sub>3</sub>

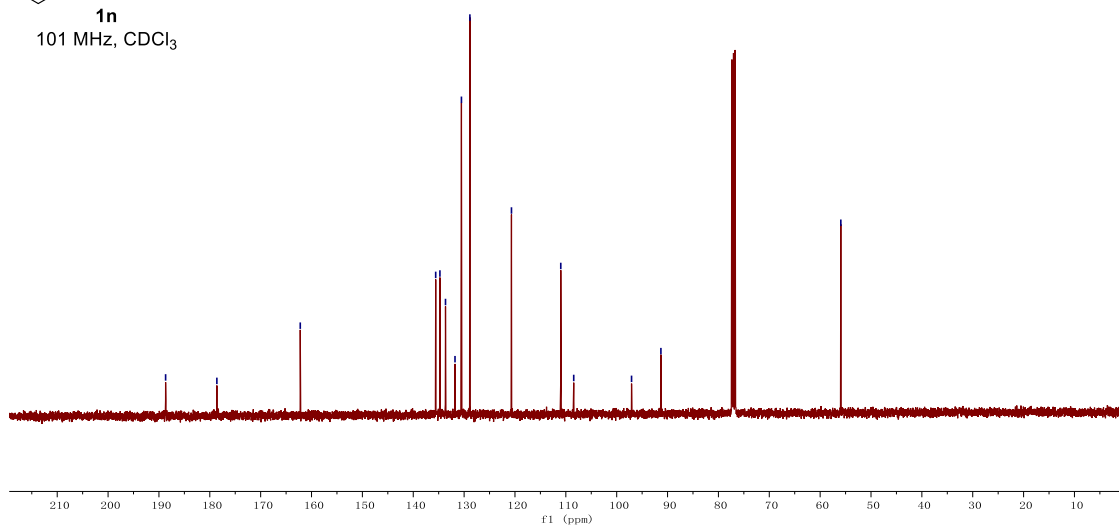

c120210820-1-p. 1. f1.d

8.0865  
8.0883  
7.6984  
7.6798  
7.6613  
7.5541  
7.5347  
7.5154  
— 6.9022

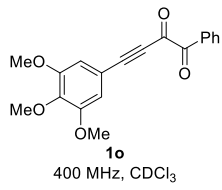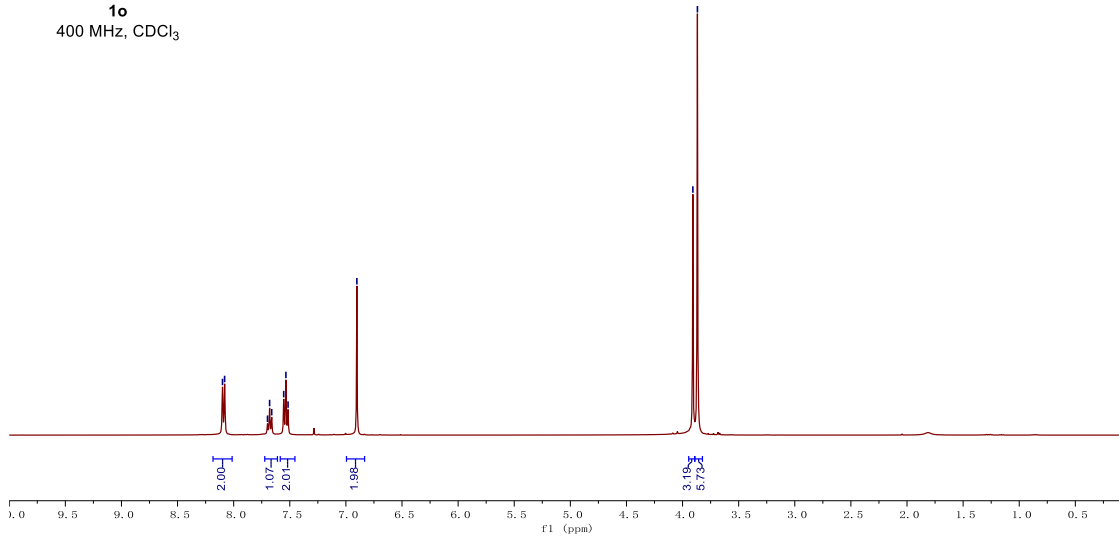

c120210820-1-p. 2. f1.d

188.52  
178.25  
153.22  
141.94  
134.92  
131.63  
130.52  
128.94  
113.65  
111.08  
99.87  
86.80  
61.07  
56.30

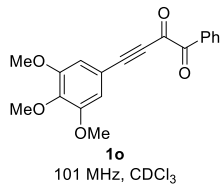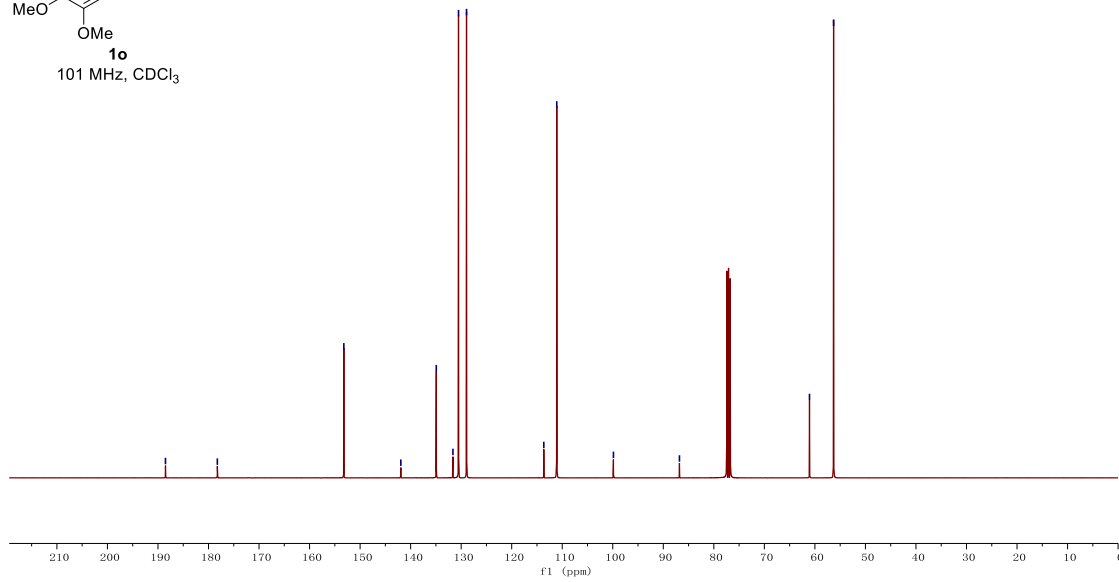

c120210907-s. 1. fid

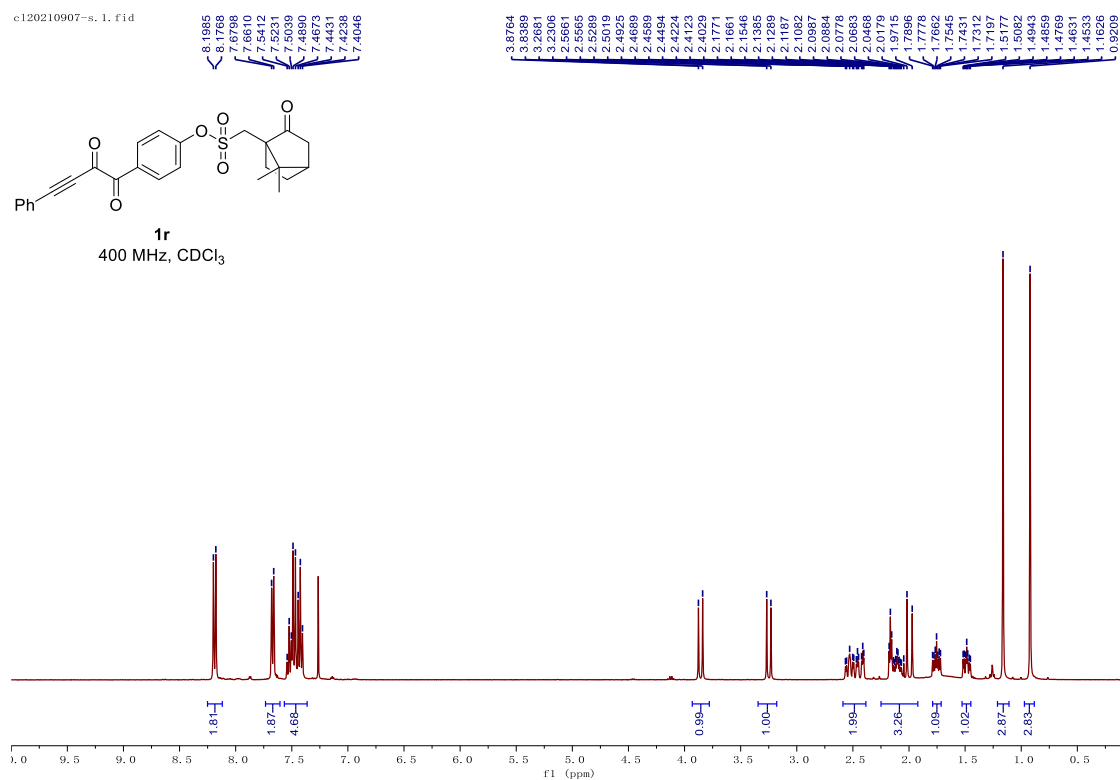

c120210907-s  
single pulse decoupled

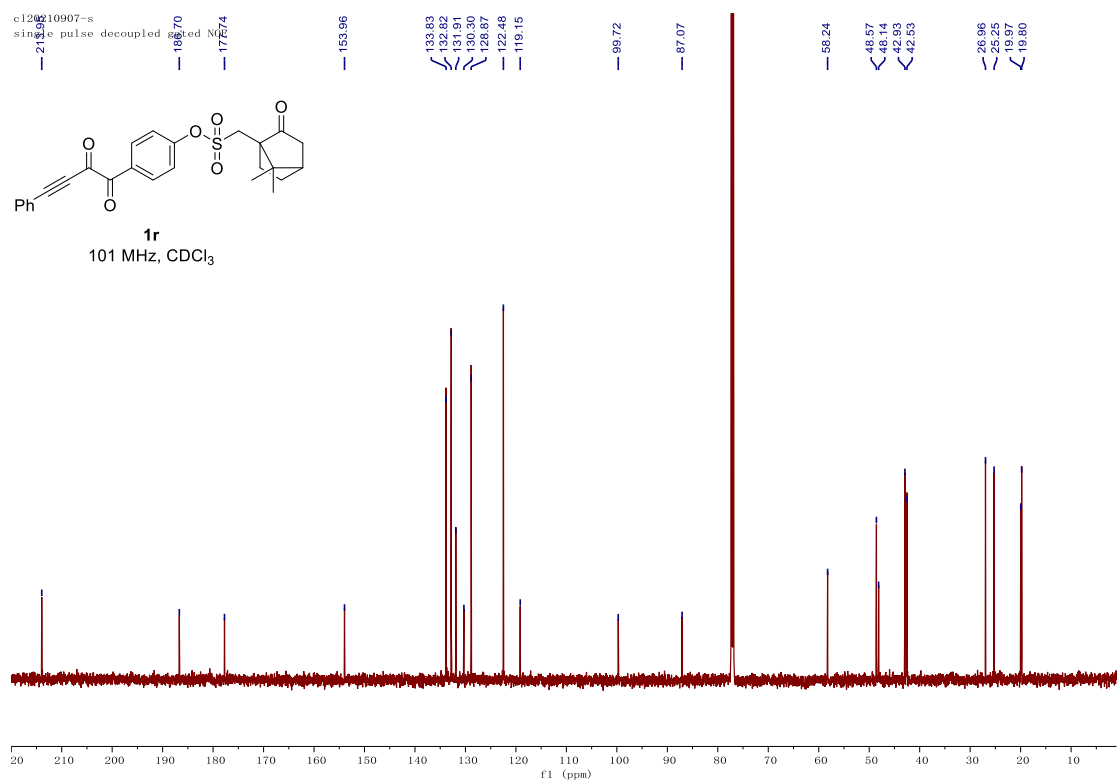

c120210324-1-p. 1. f1d

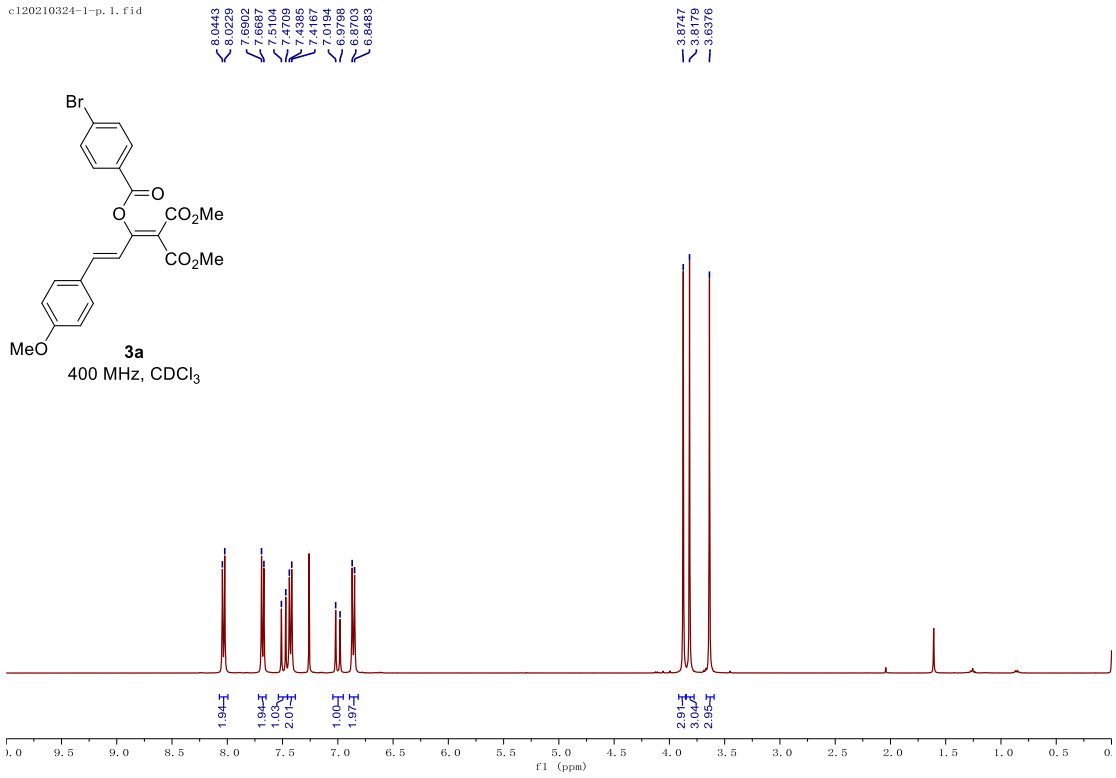

c120210320-1-p. 1. f1d

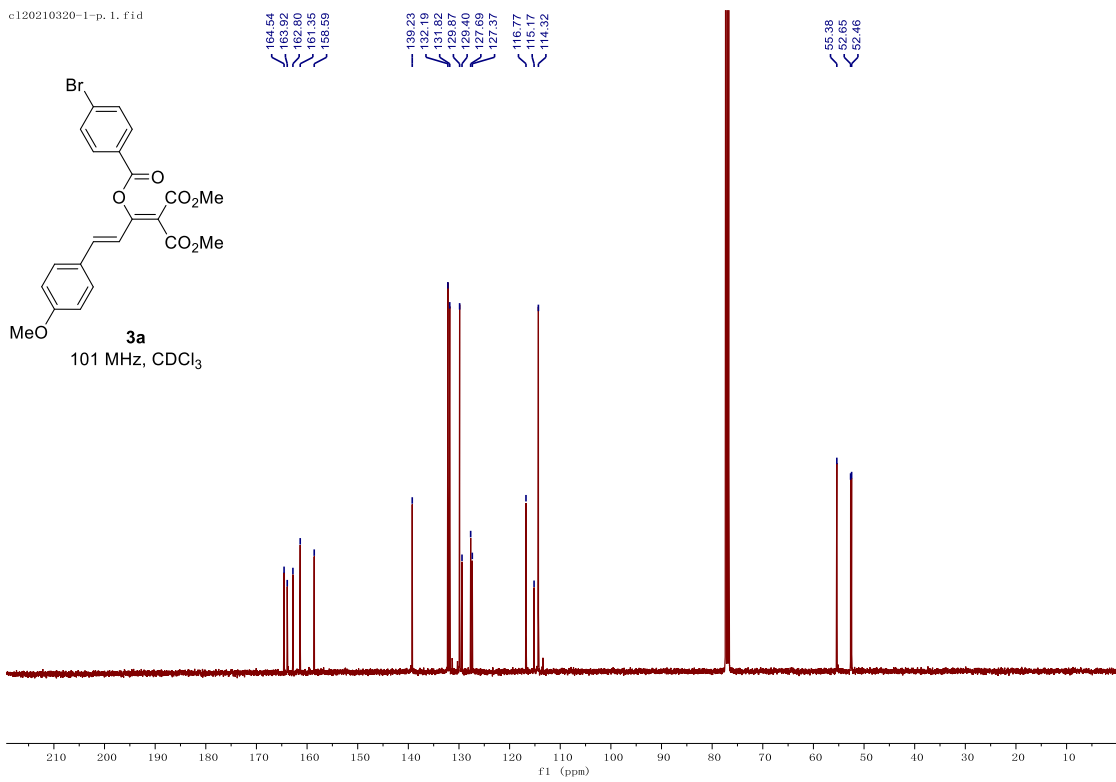

CL20210428-Ph  
single\_pulse

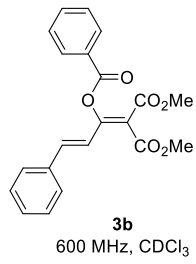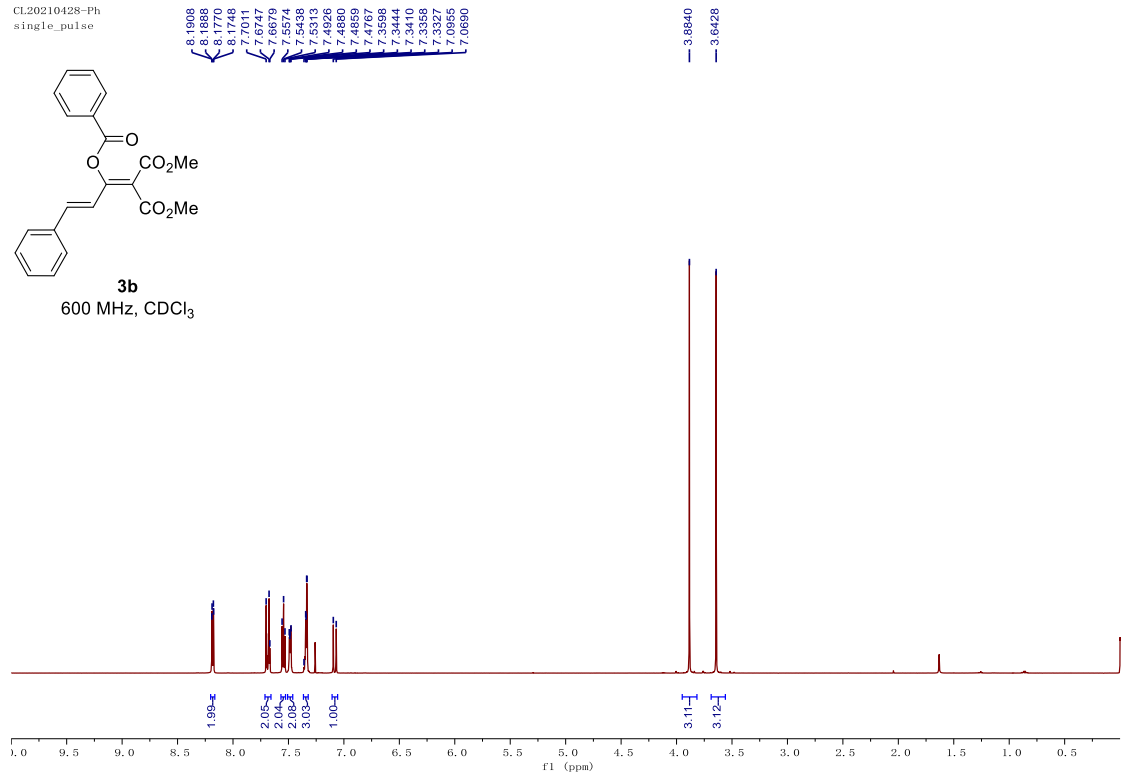

c120210428-Ph-1  
single pulse decoupled gated NOE

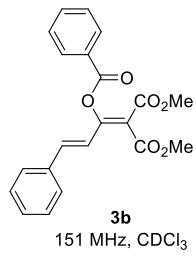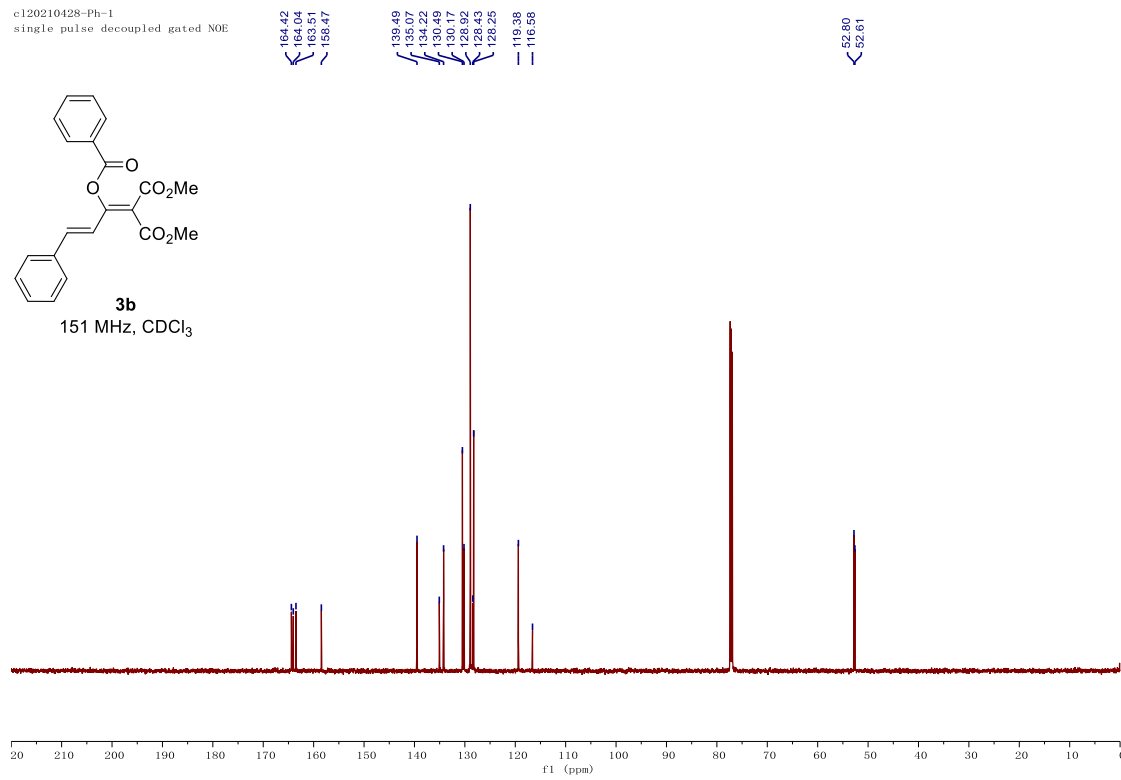



c120210404-p. 1. fid

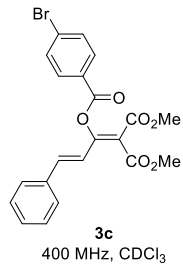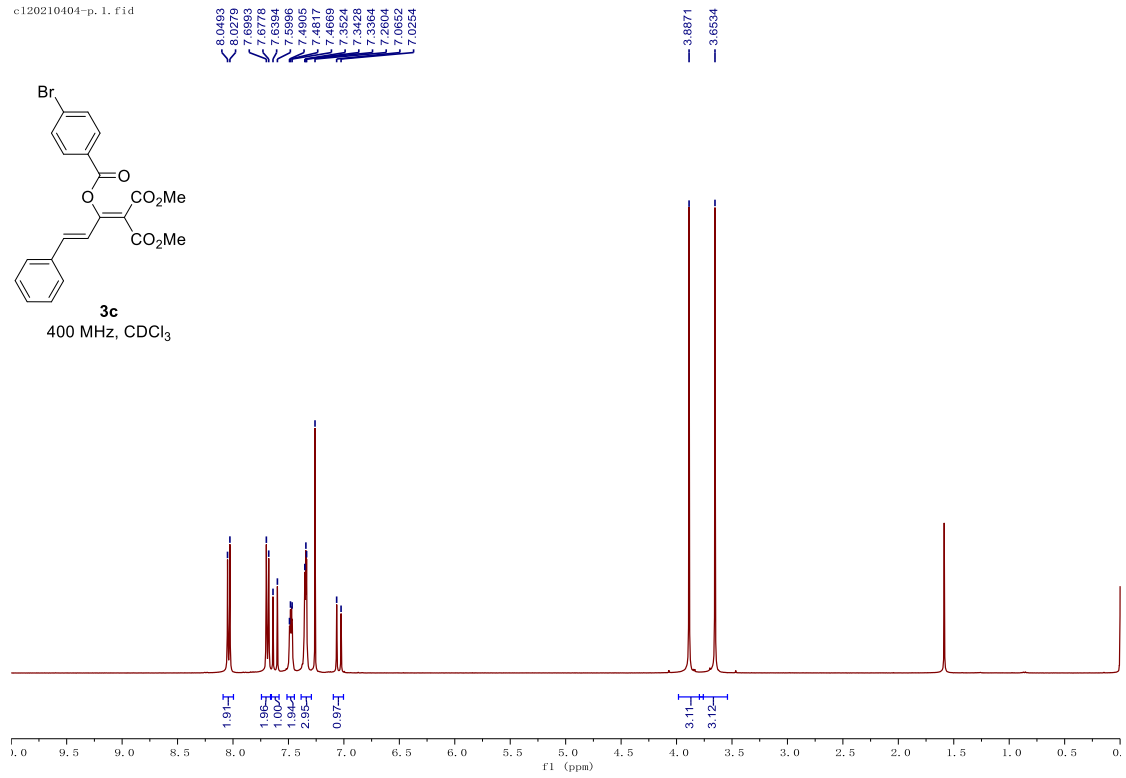

c120210404-p-2a. 1. fid

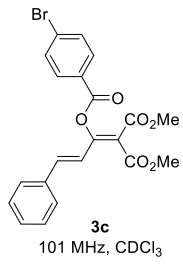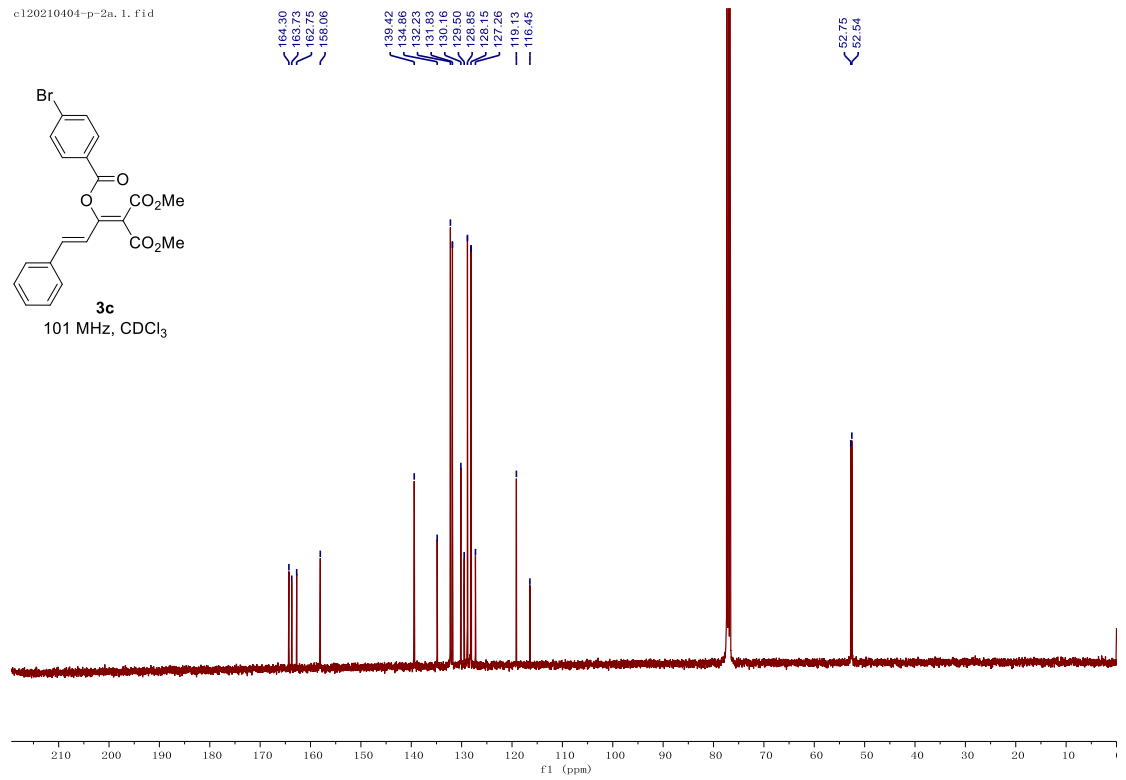

c120210428-F  
single\_pulse

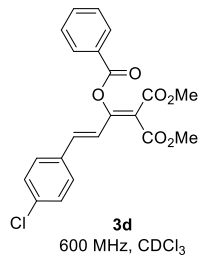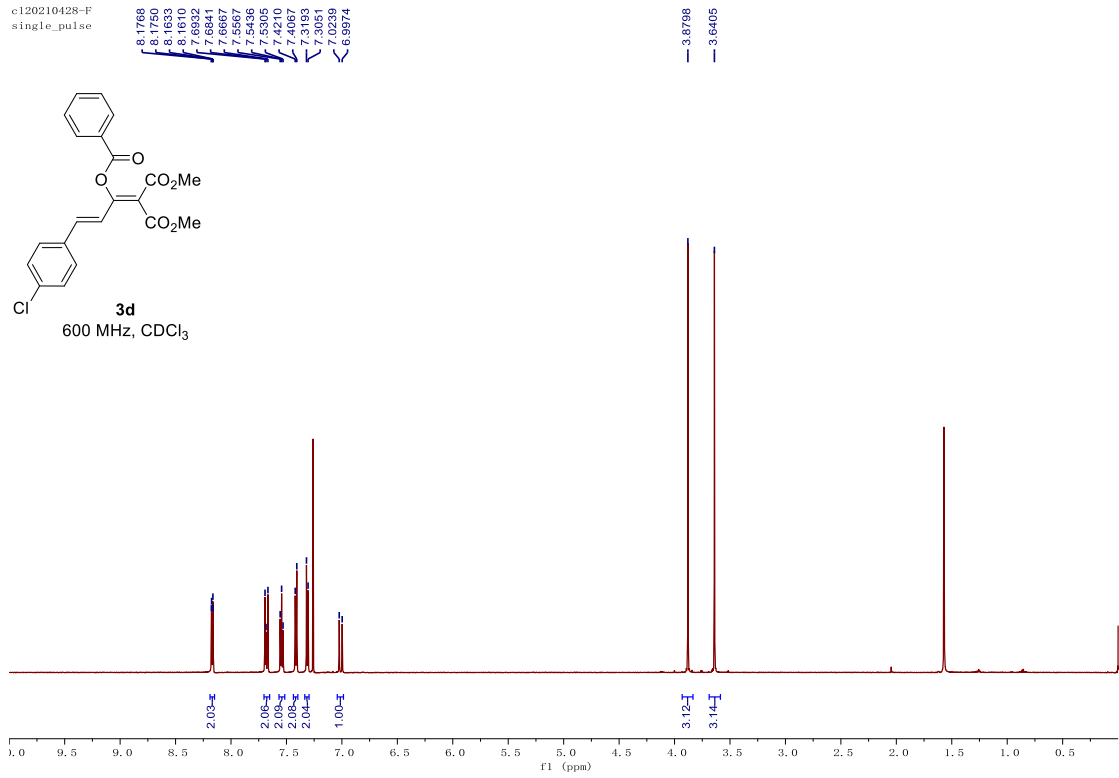

CL-210428-F. 1. f1d

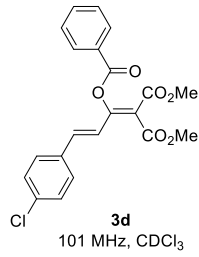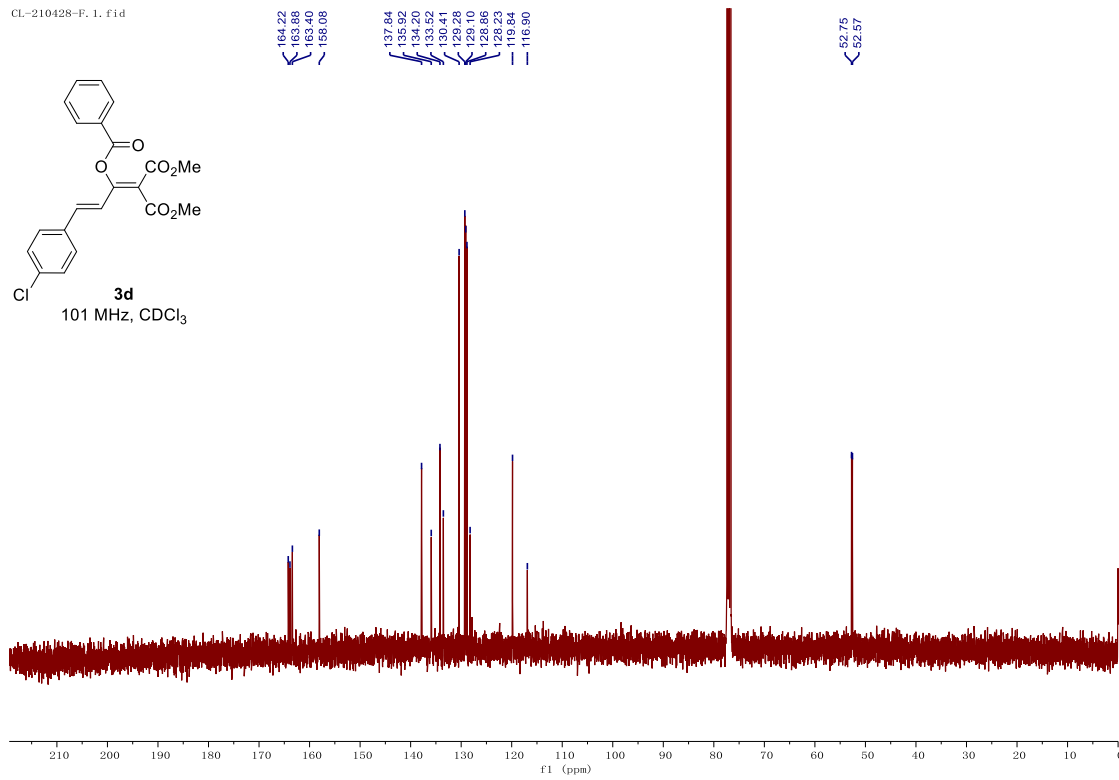

CL20210428-C1  
single\_pulse

8.1675  
8.1655  
8.1636  
8.1614  
7.8827  
7.6806  
7.6717  
7.6702  
7.6677  
7.6599  
7.6585  
7.6565  
7.6263  
7.5998  
7.5440  
7.5412  
7.5313  
7.5255  
7.5171  
7.4712  
7.4677  
7.4622  
7.4595  
7.4567  
7.4512  
7.4479  
7.2948  
7.0348  
7.0300  
7.0205  
7.0059  
7.0036

3.8656  
3.6262

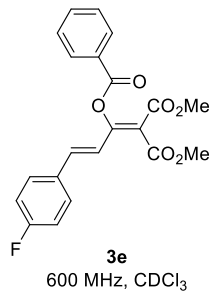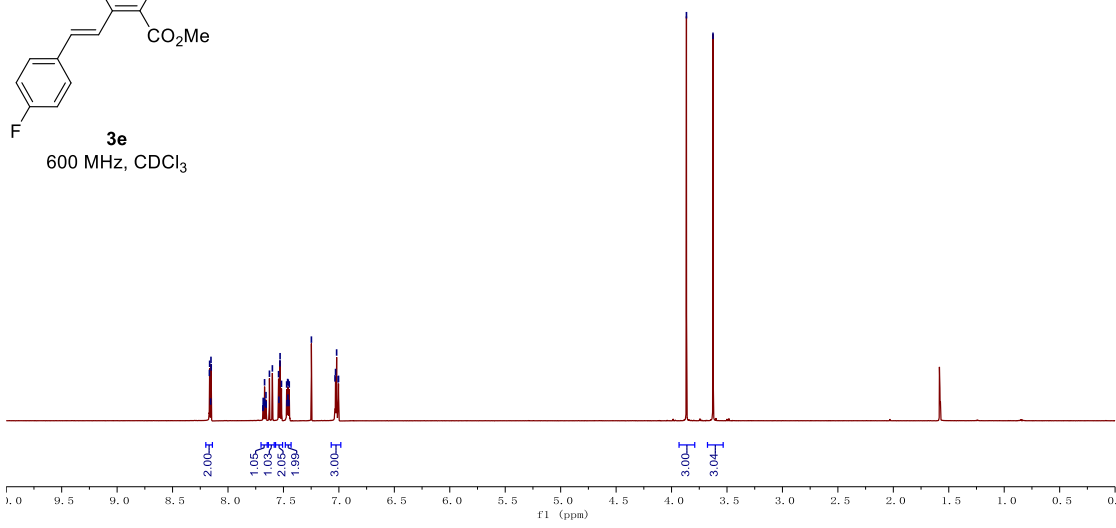

CL-210428-C1.1.fid

164.99  
163.99  
163.84  
163.42  
162.49  
158.27  
138.01  
134.17  
131.31  
131.28  
130.40  
130.04  
129.95  
128.95  
128.88  
119.09  
119.07  
116.53  
116.11  
115.89

52.71  
52.54

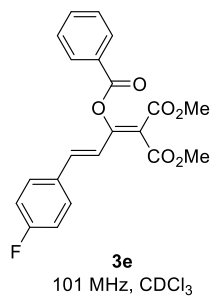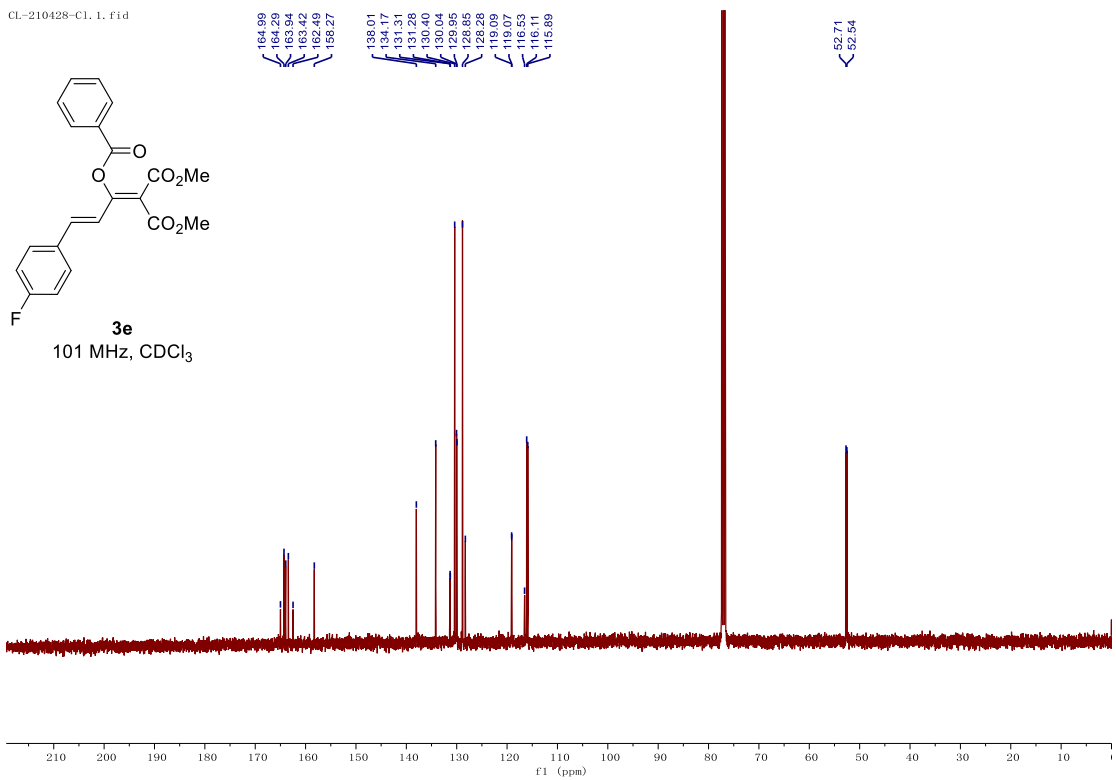

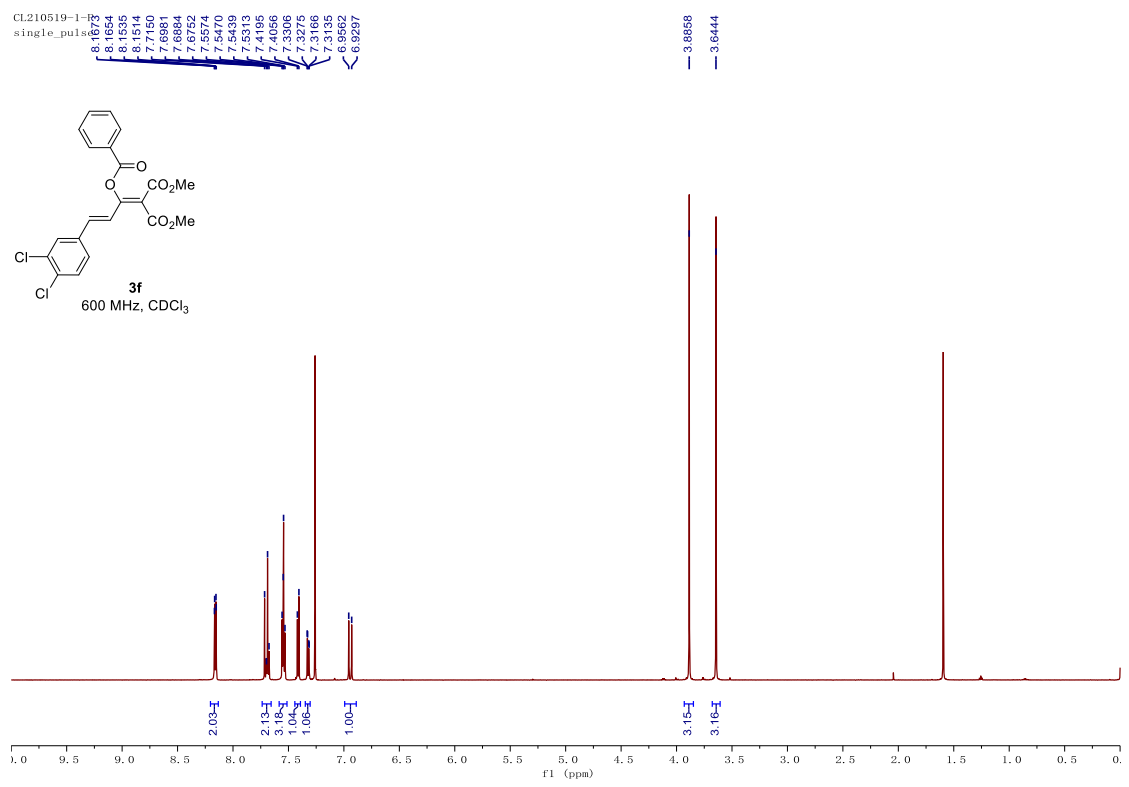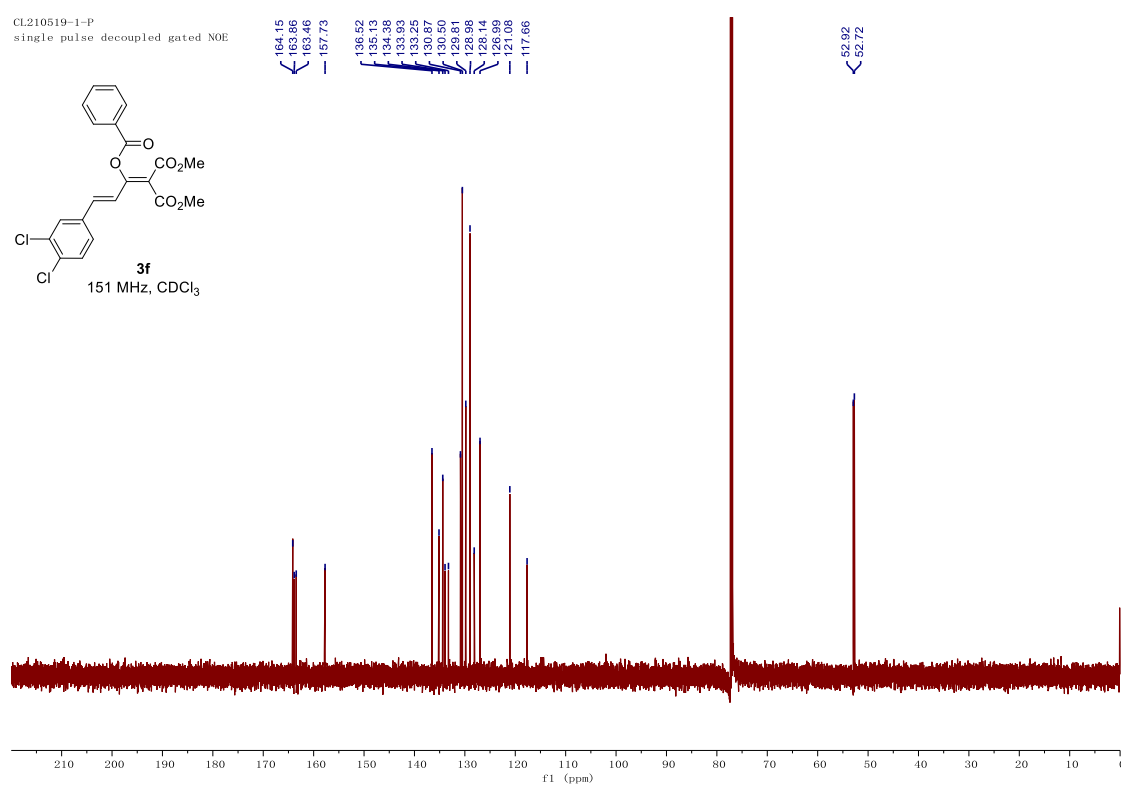

Cl20210516-S-2. 1. fid

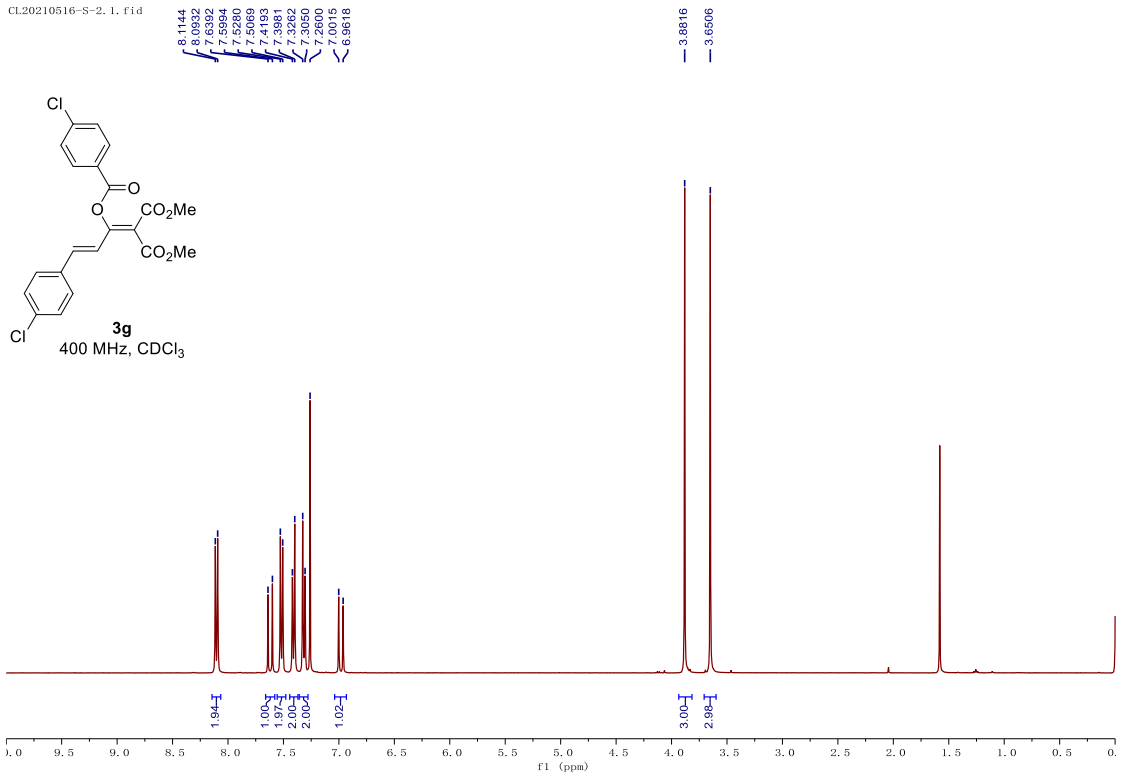

c120210516-1-p-c. 1. fid

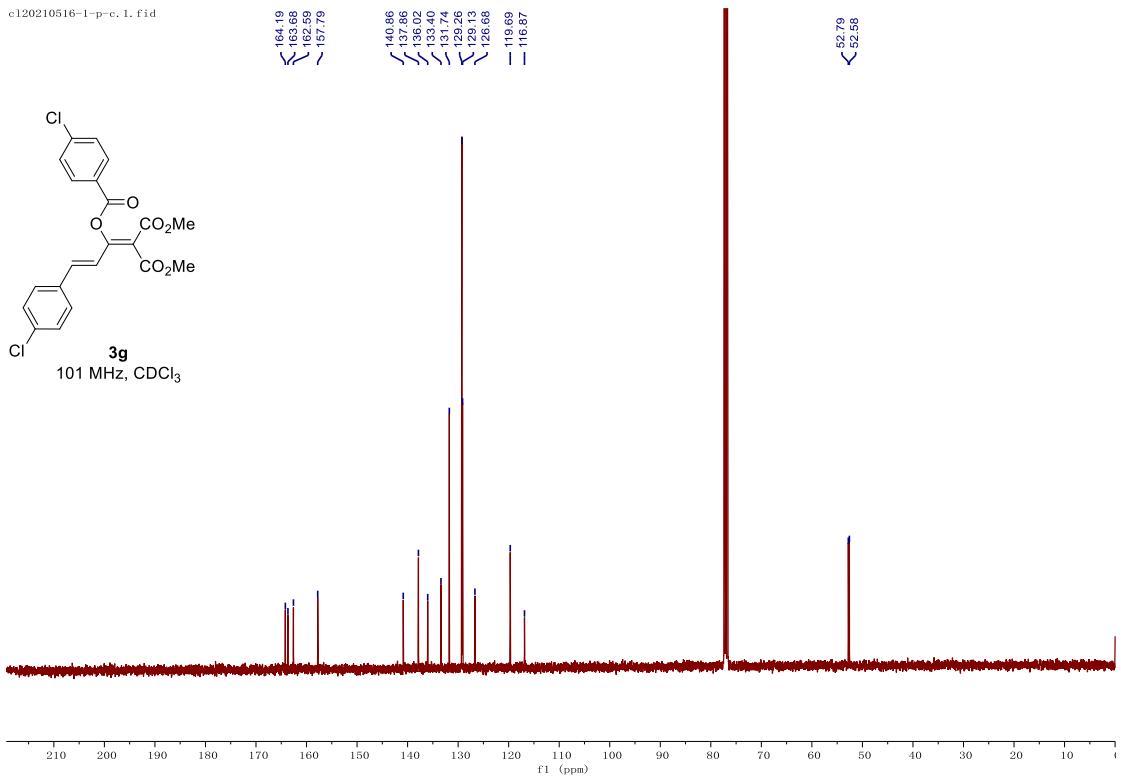

c120210425-p-OMe. 1.fid

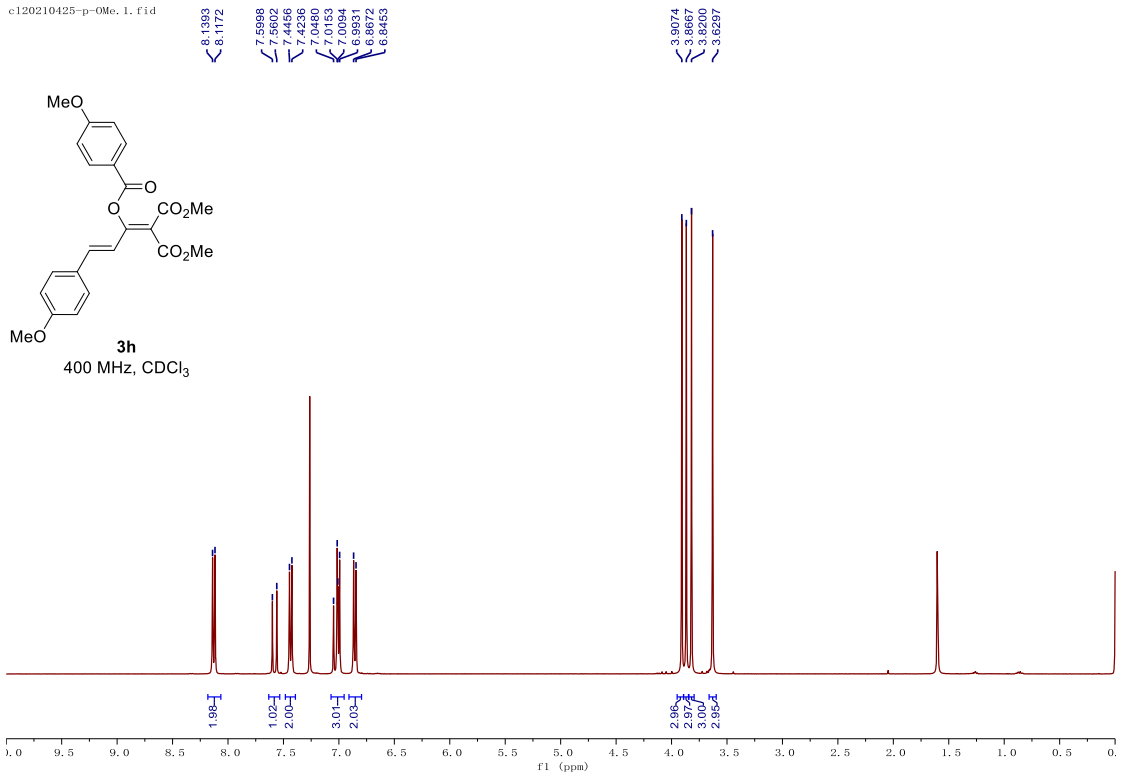

c120210425-p-OMe  
single pulse decoupled gated NOE

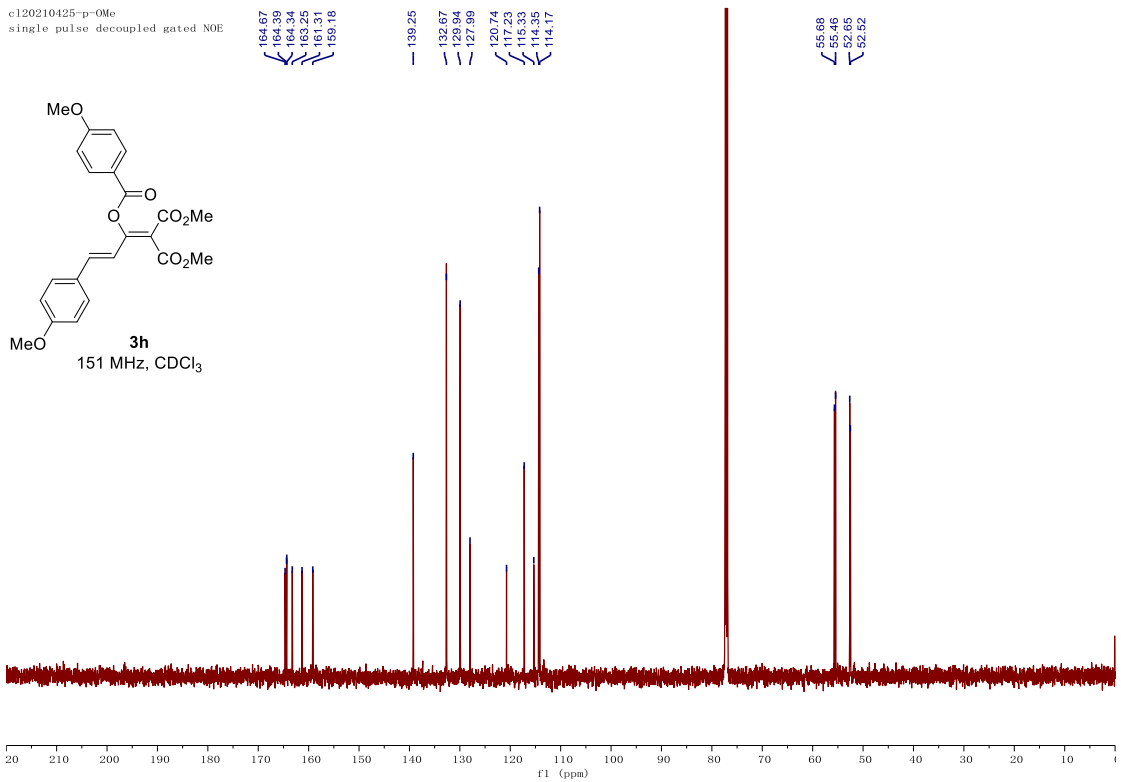

c120210531-1-p, 1. f1d

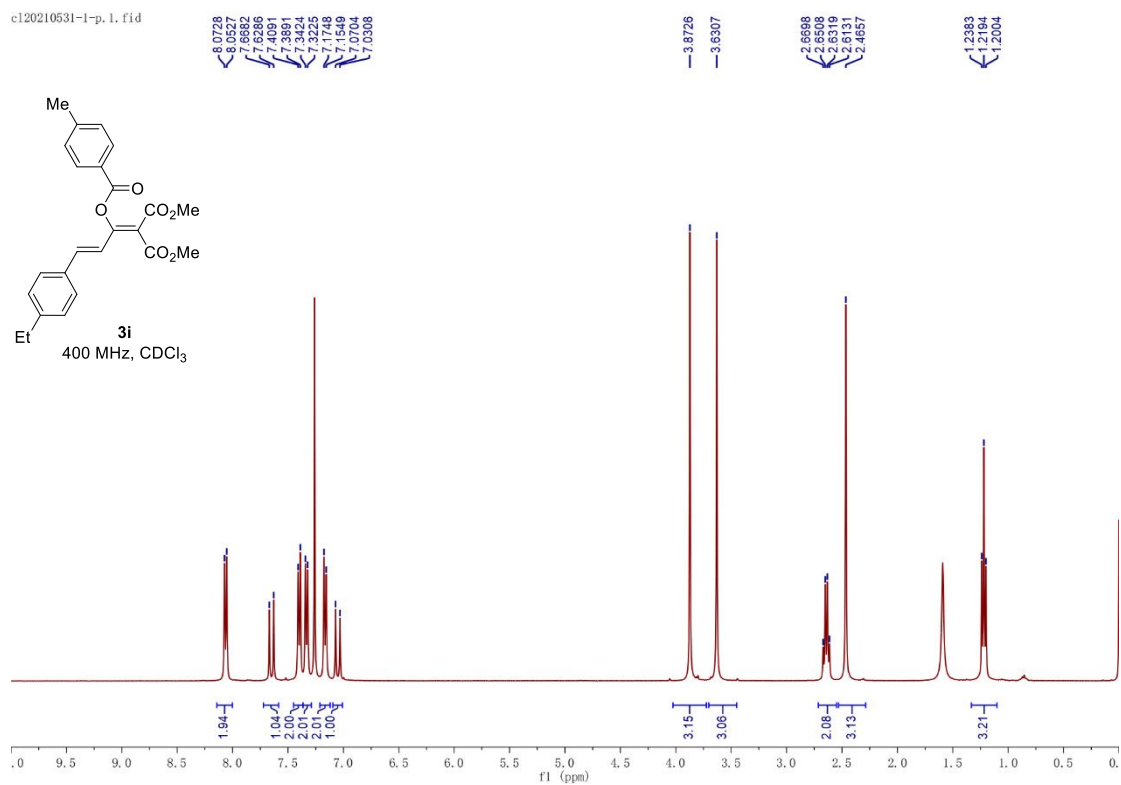

c120210531-1-p  
single pulse decoupled gated NOE

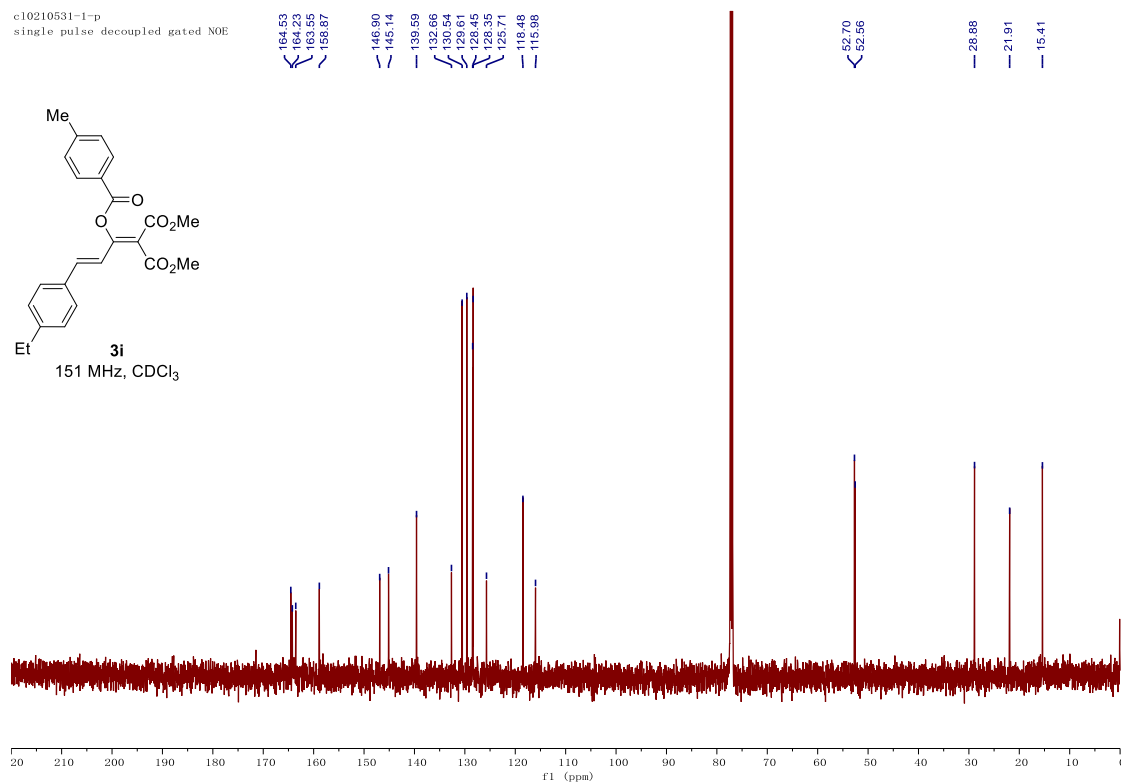

c120210529-Ph. 1. fid

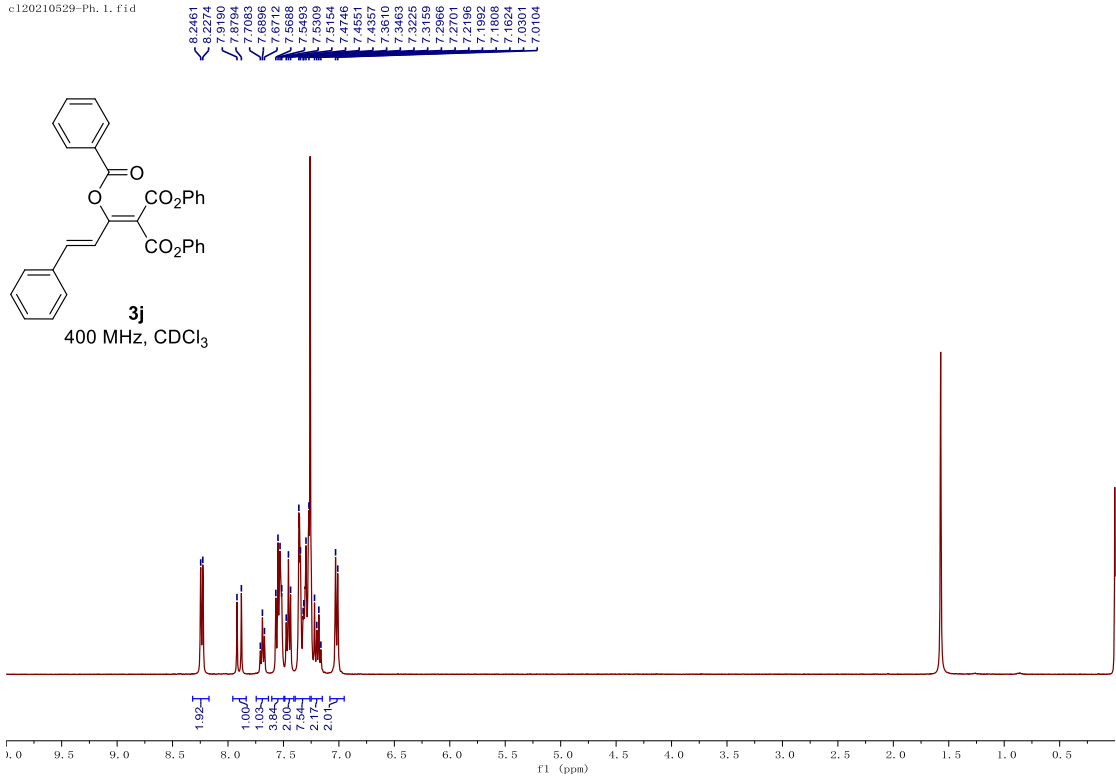

c120210528-Ph. 1  
single pulse decoupled gated NOE

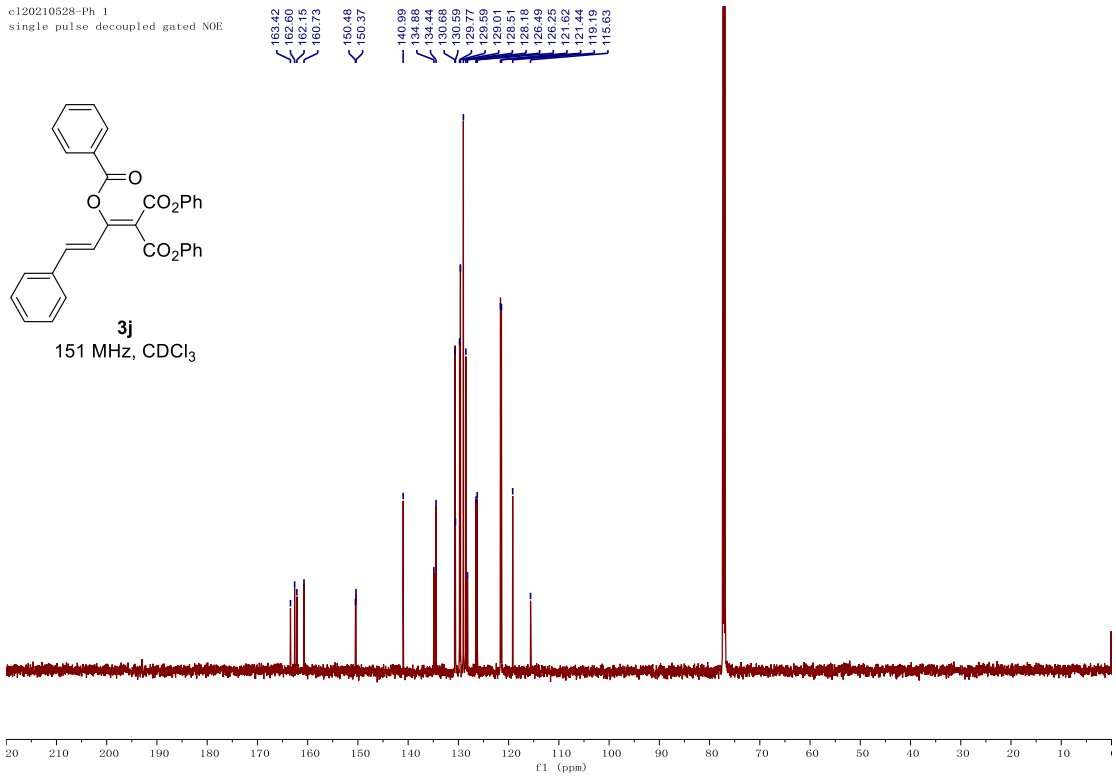



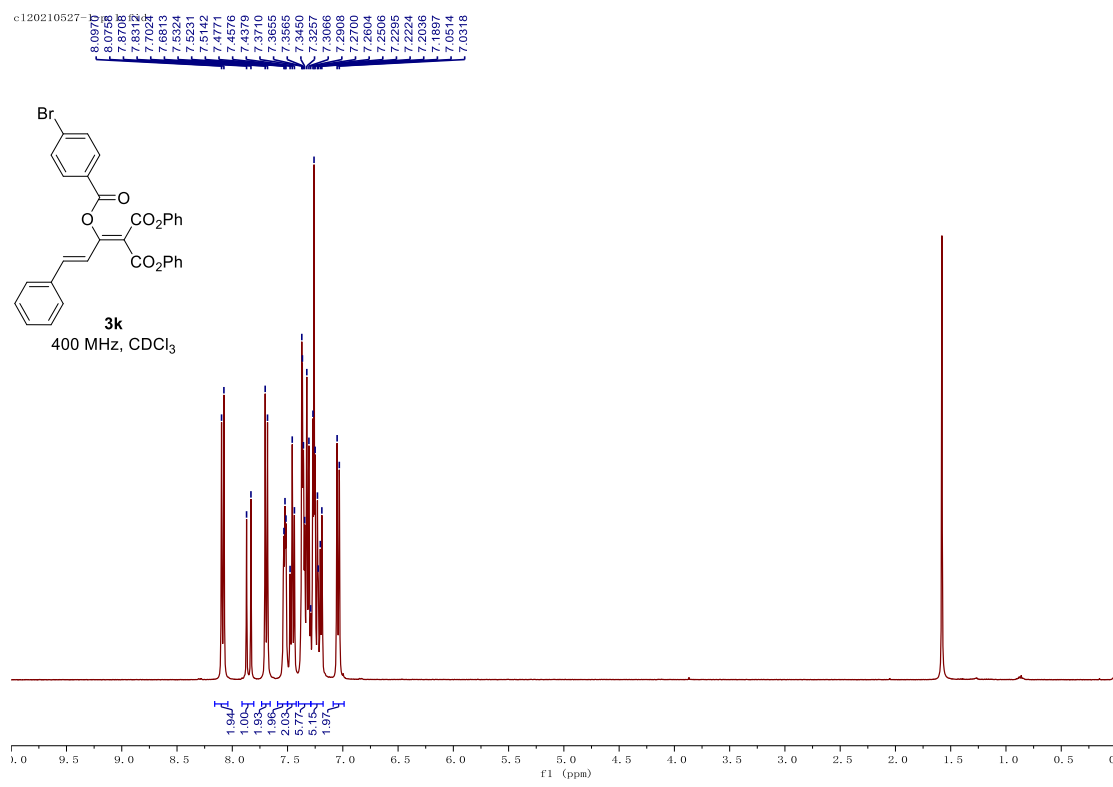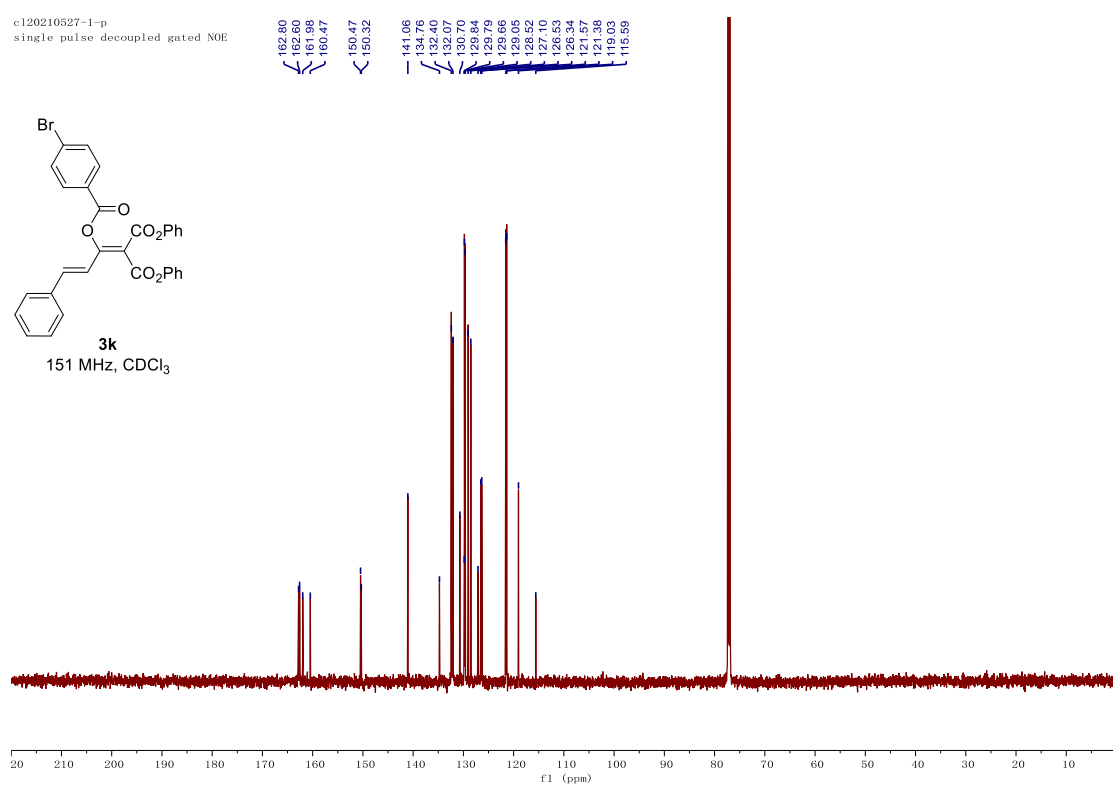

c120210528-0Me  
single\_pulse

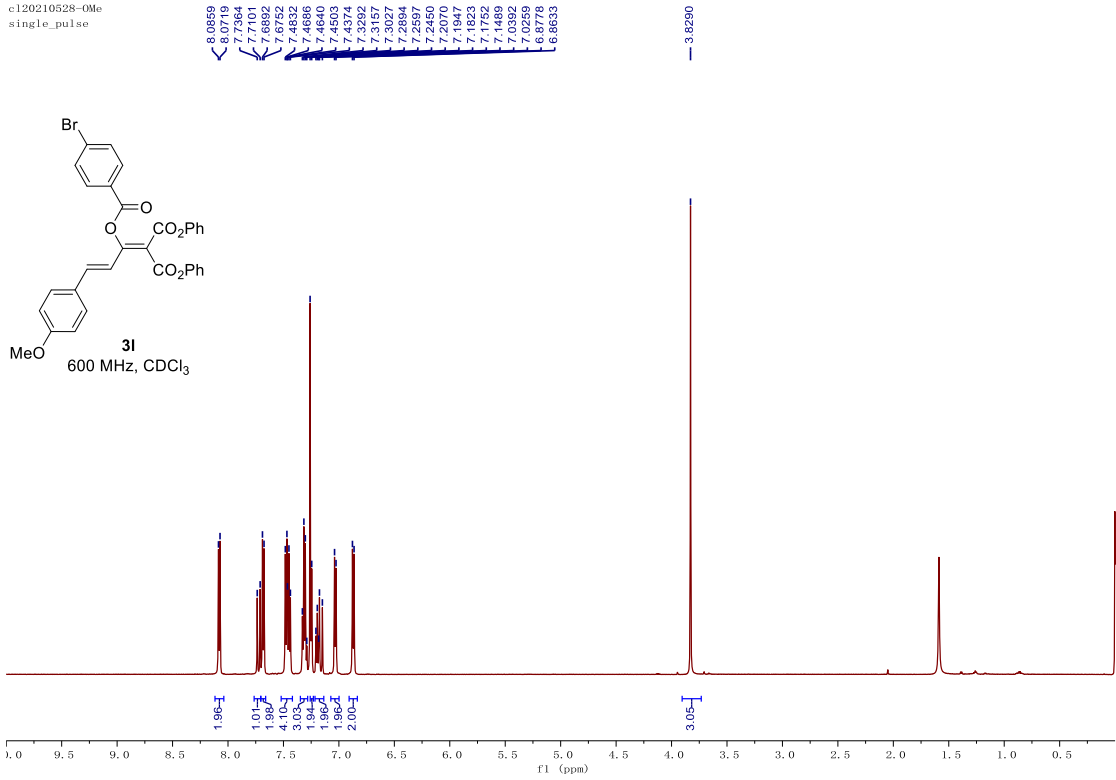

c120210528-0Me  
single\_pulse decoupled gated NOE

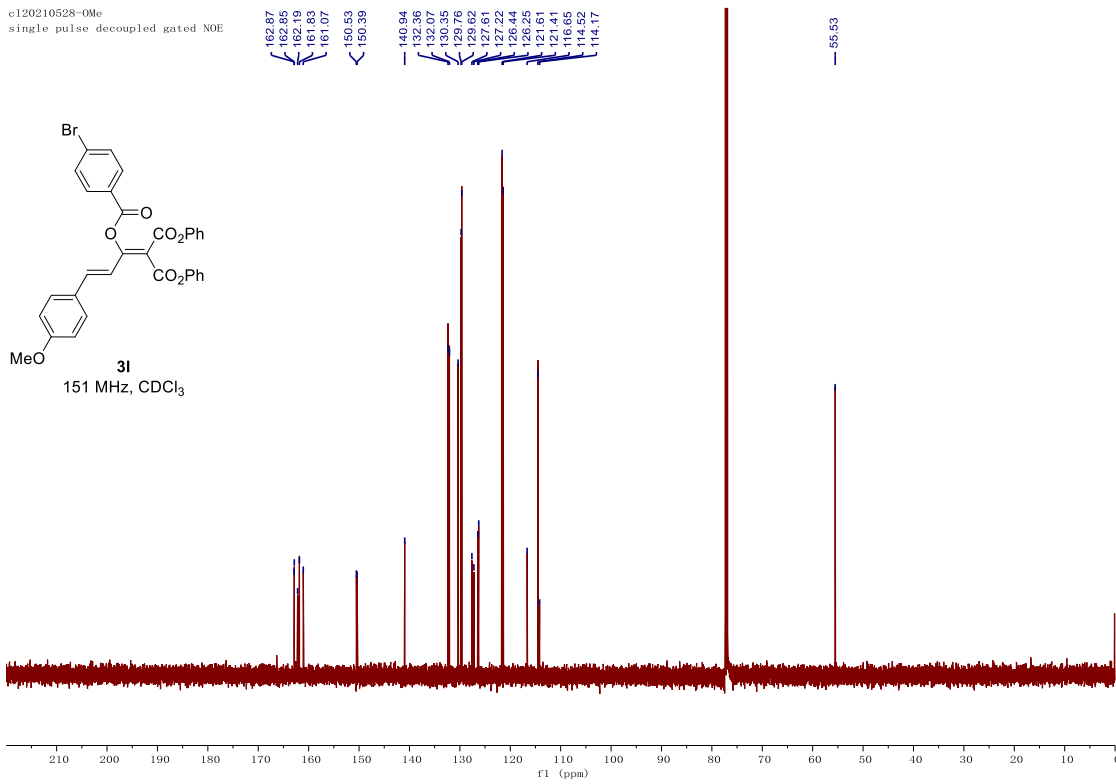

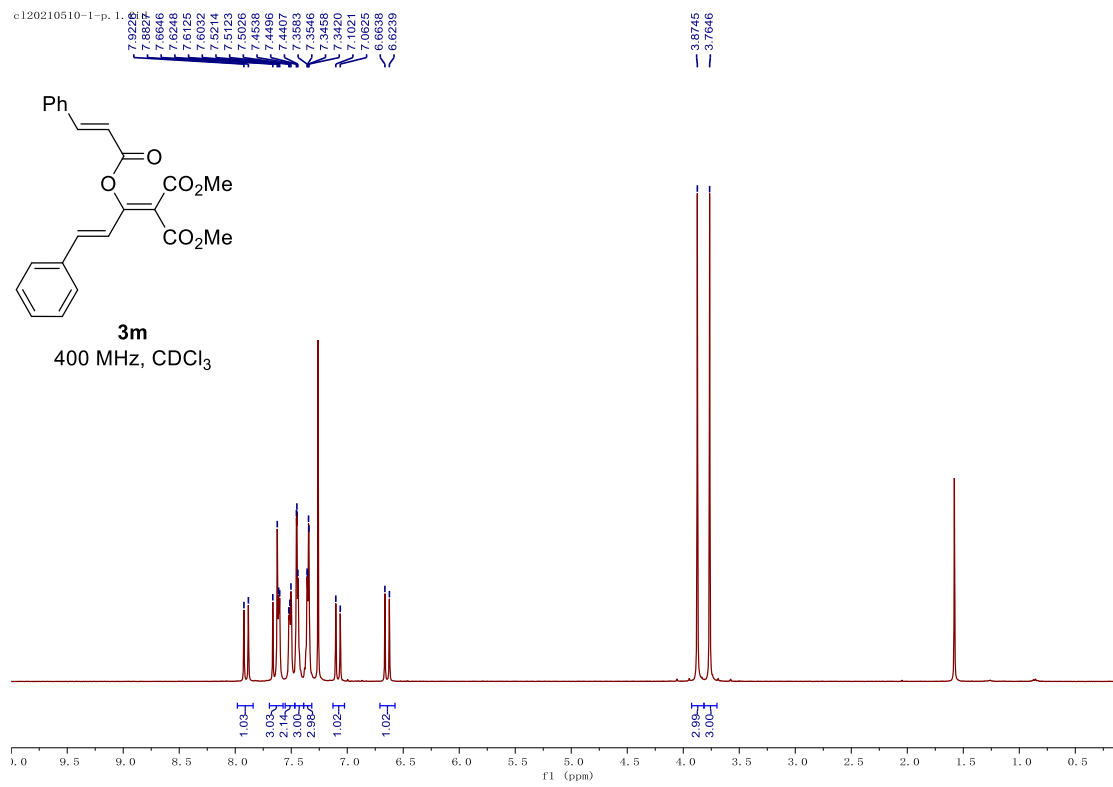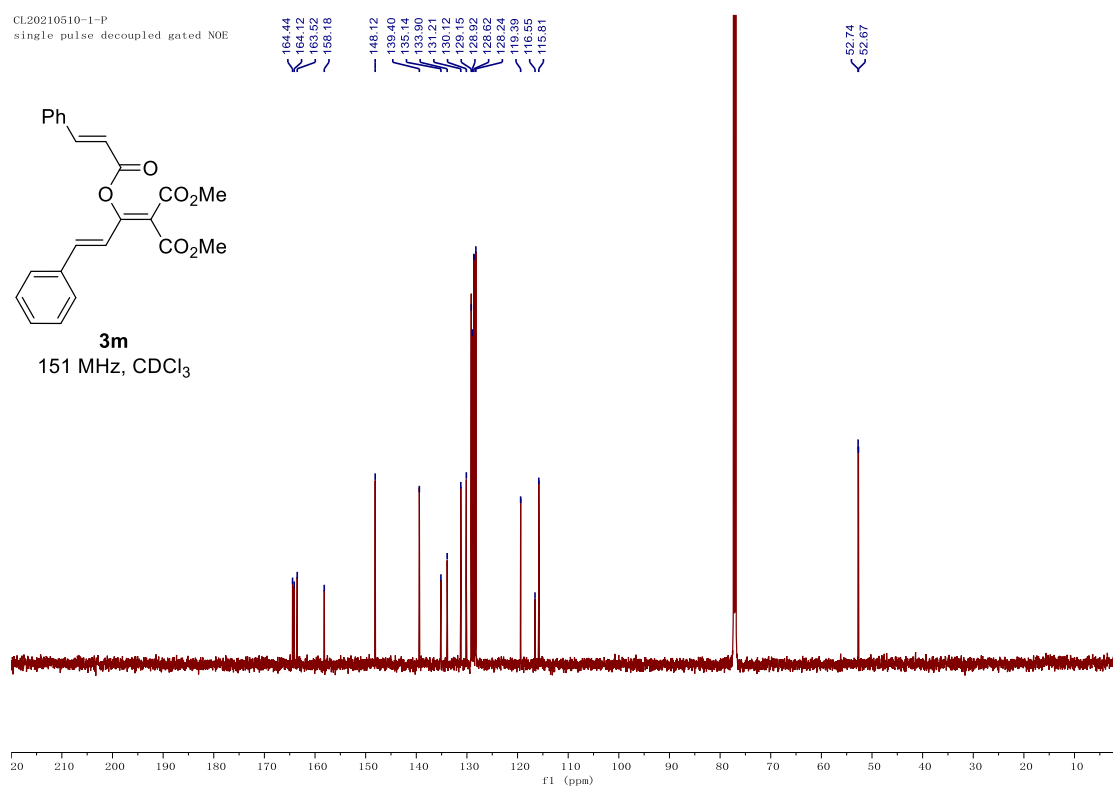

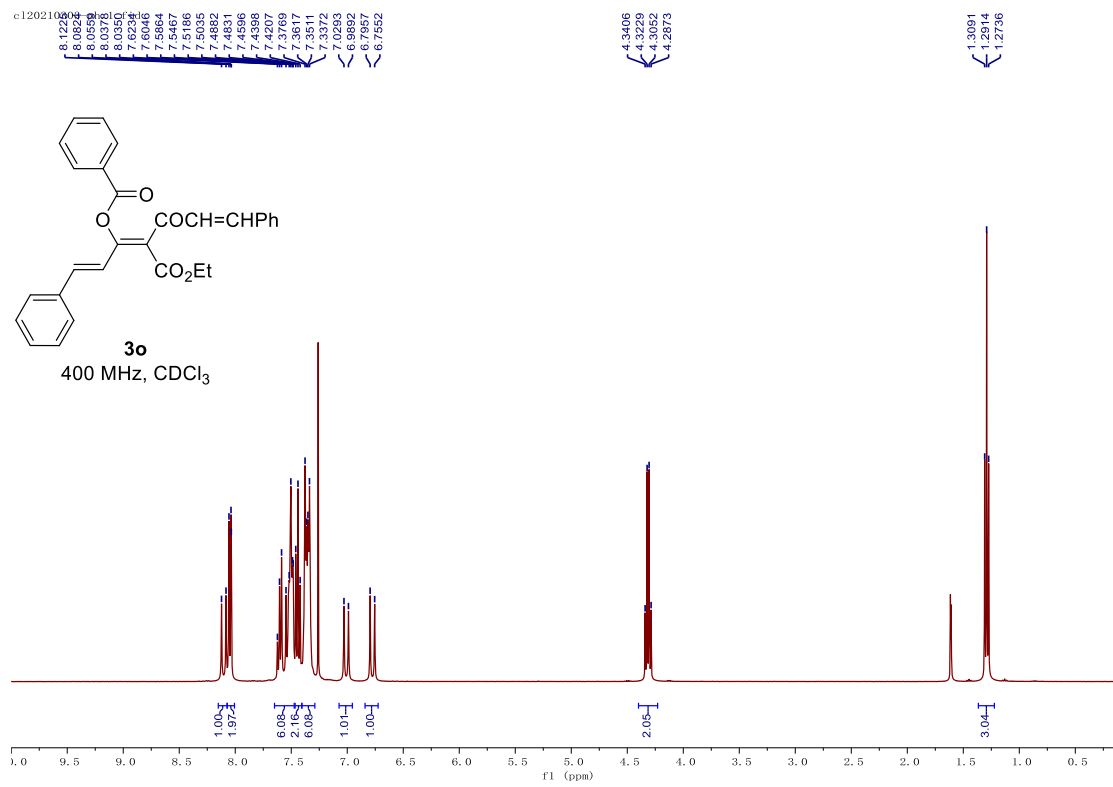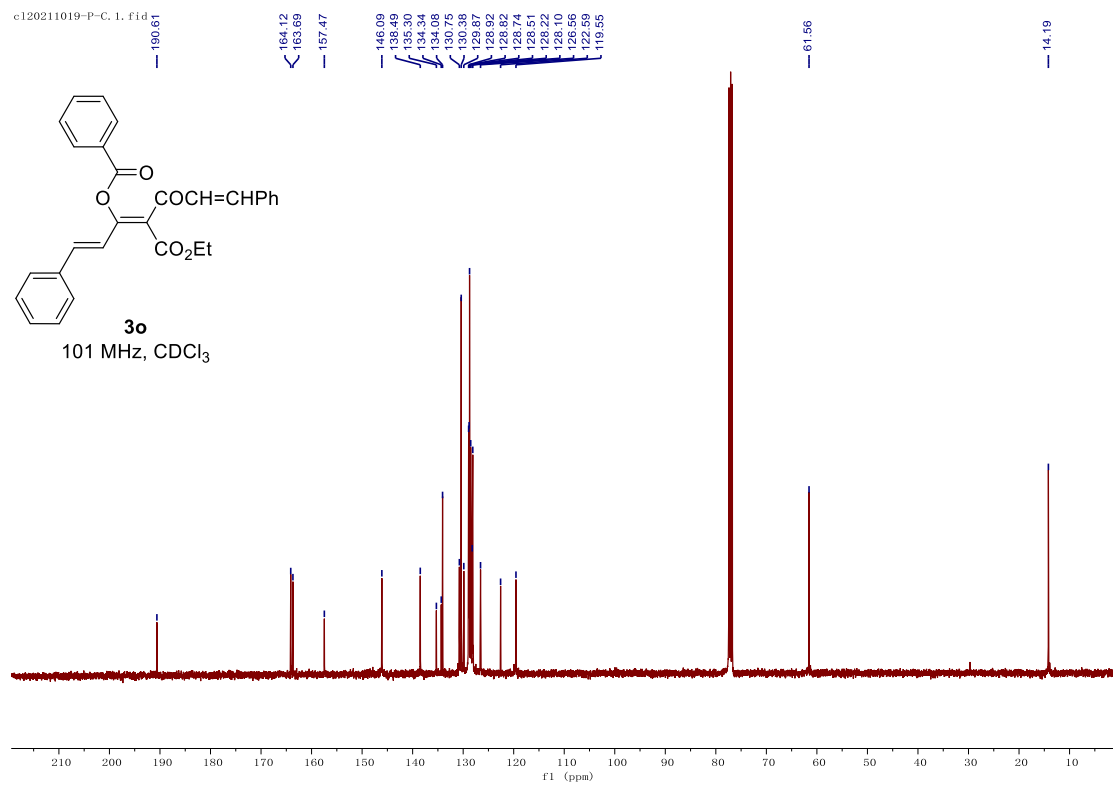

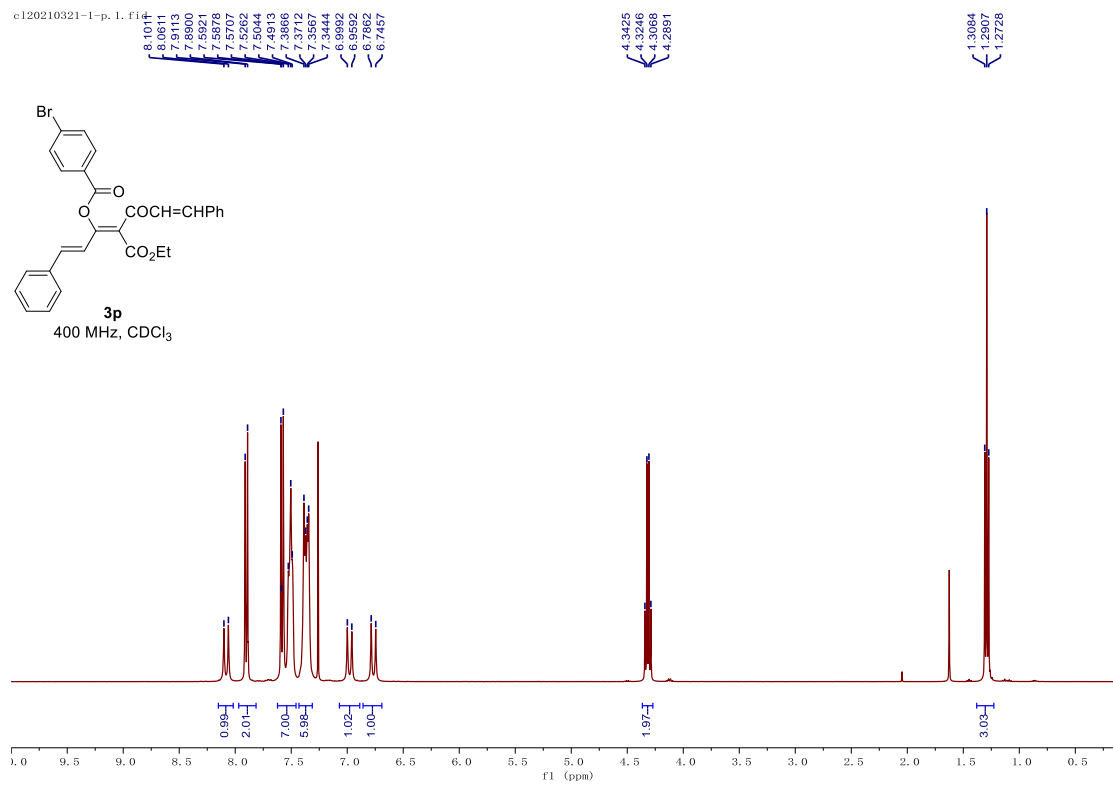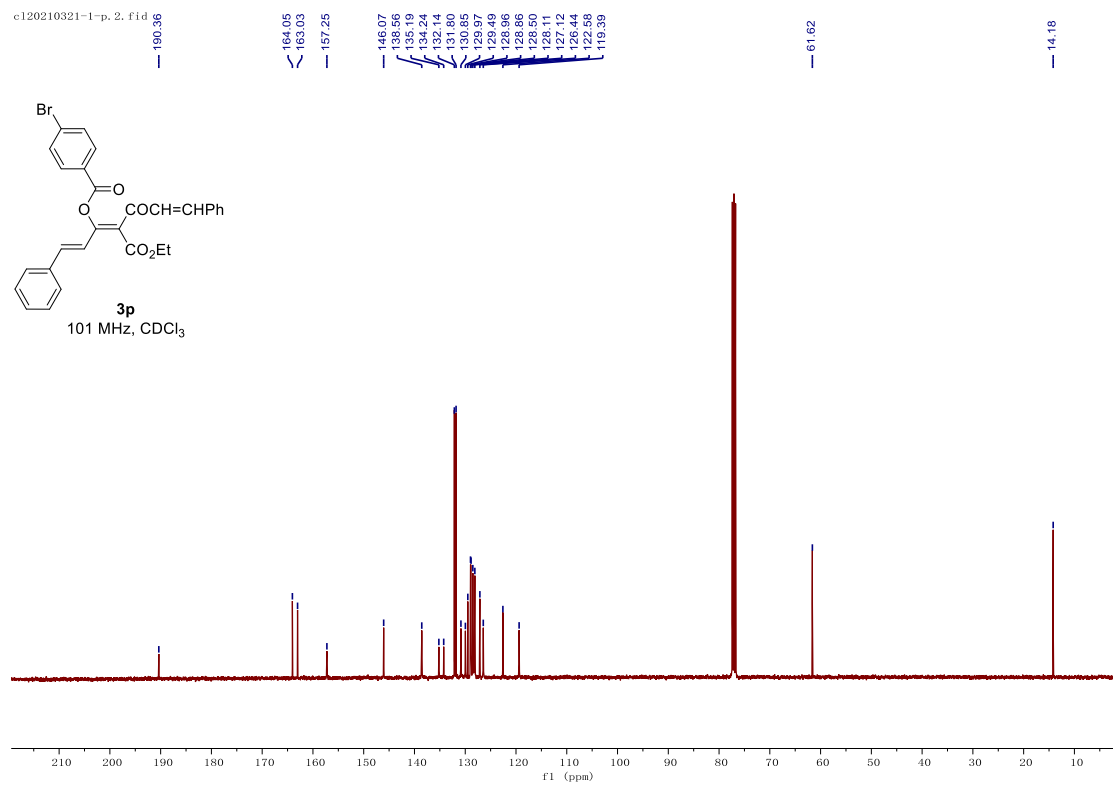

c120210325-1-p  
single\_pulse

8.1458  
8.1419  
8.1386  
8.1305  
8.1272  
8.1237  
7.7796  
7.7764  
7.77084  
7.77052  
7.77015  
7.75999  
7.7547  
7.7457  
7.0247  
6.9995  
6.9882  
6.9848  
6.7870  
6.7839  
6.7793  
6.7723  
6.5497  
6.5238

4.0320  
4.0202  
4.0083  
3.9964  
3.9777  
3.7727

0.9613  
0.9495  
0.9376

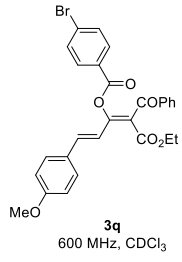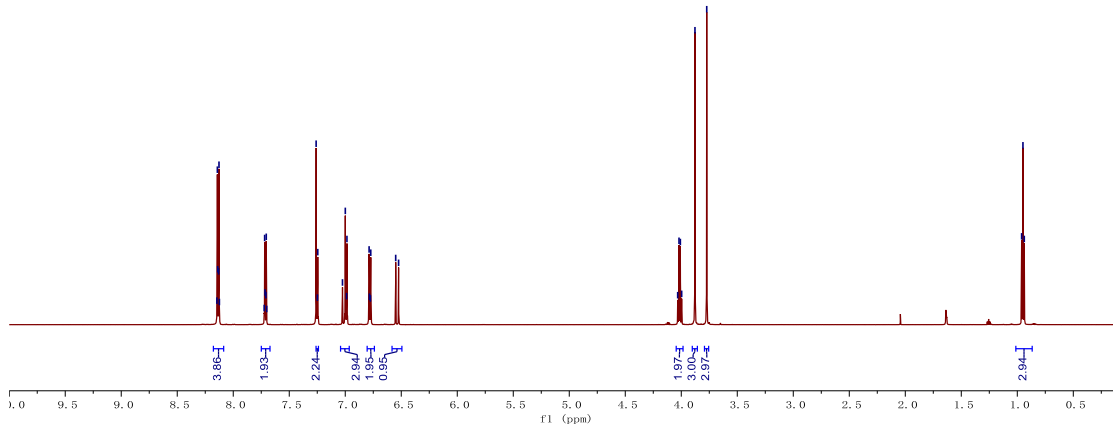

c120210325-1-p.1.f1d

190.97  
164.25  
163.60  
162.73  
161.11  
155.32  
137.77  
132.18  
131.93  
131.66  
129.60  
129.20  
127.99  
127.59  
120.83  
117.40  
114.33  
114.18

60.97  
55.56  
55.34  
13.85

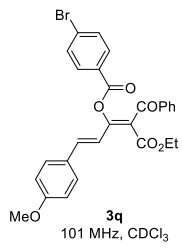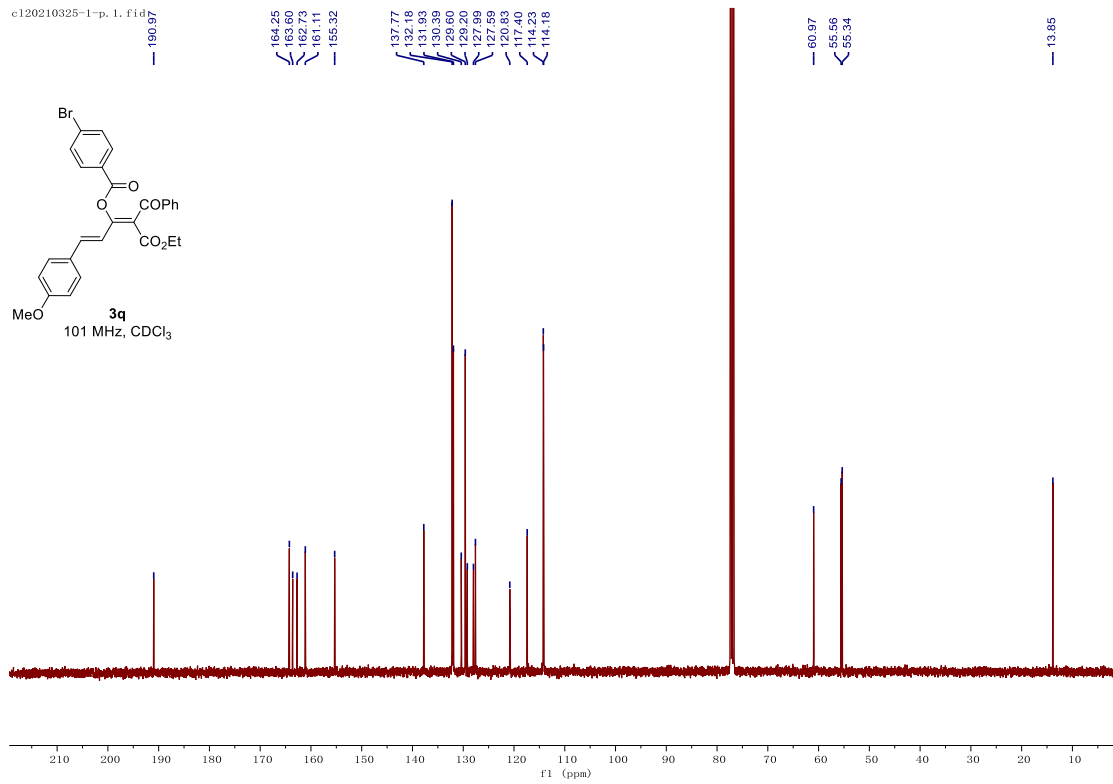

c120210401-3-p. 1. fid

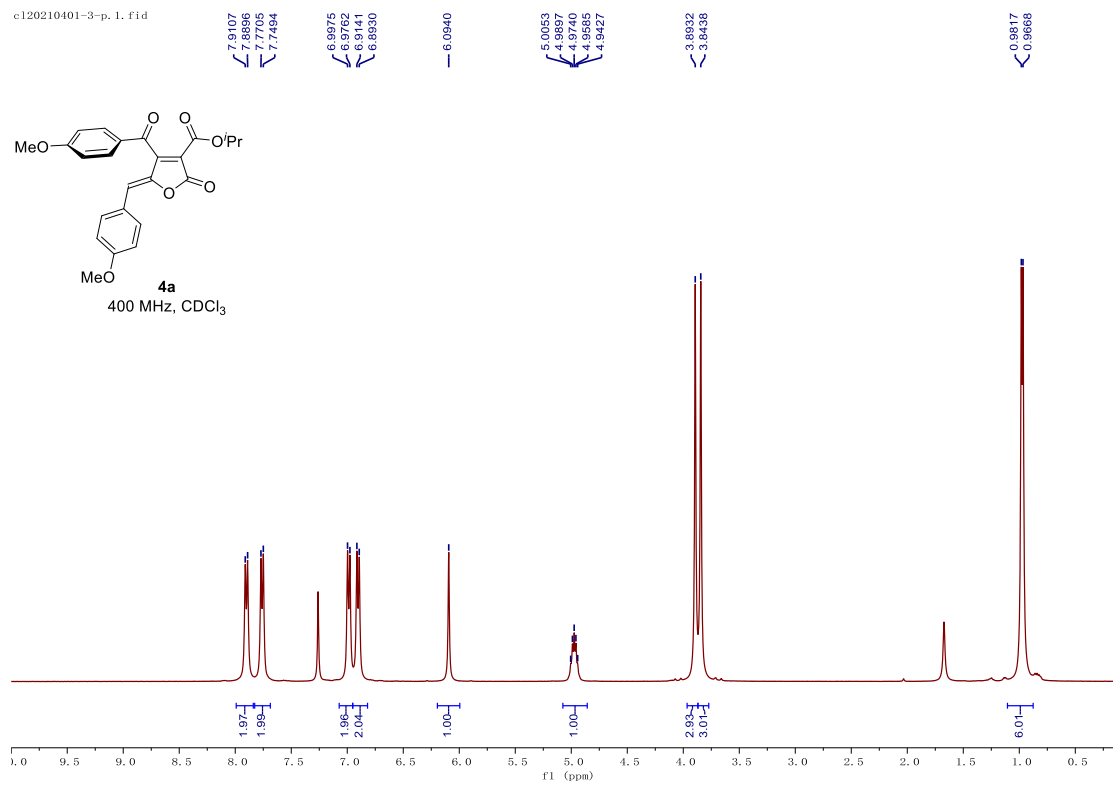

c120210401-3-p. 3. fid

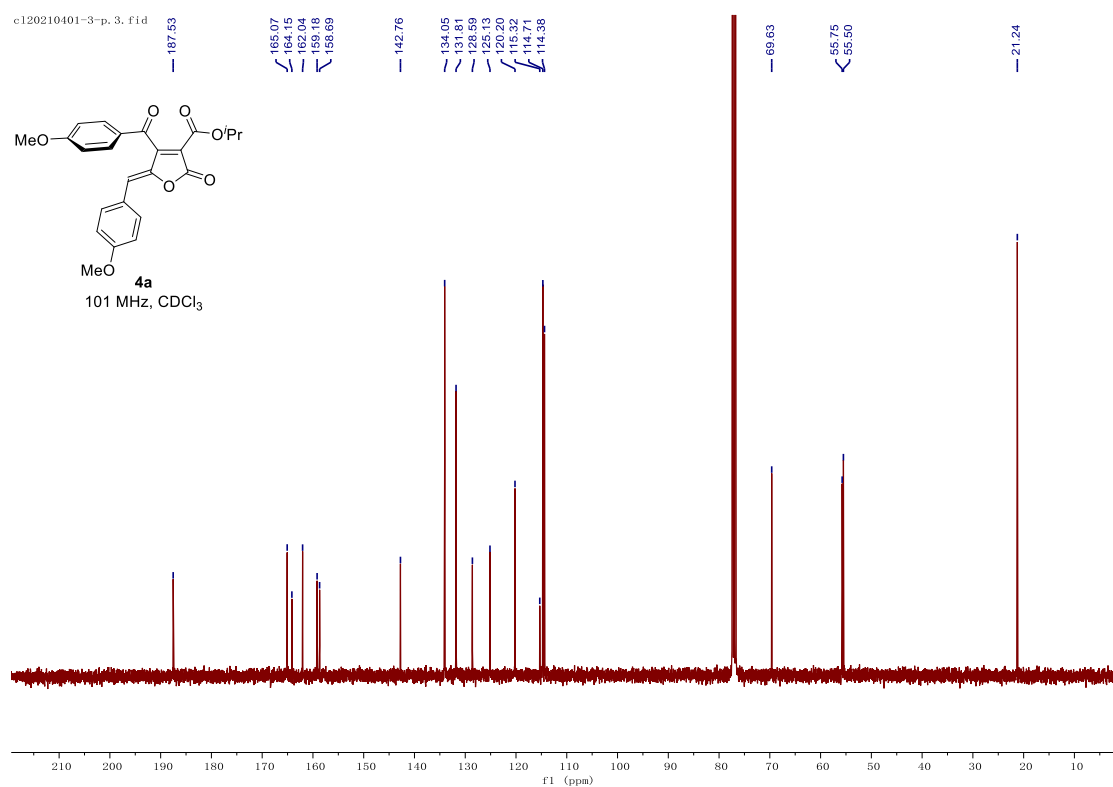

CL20210722-3-P. 1. f1.d

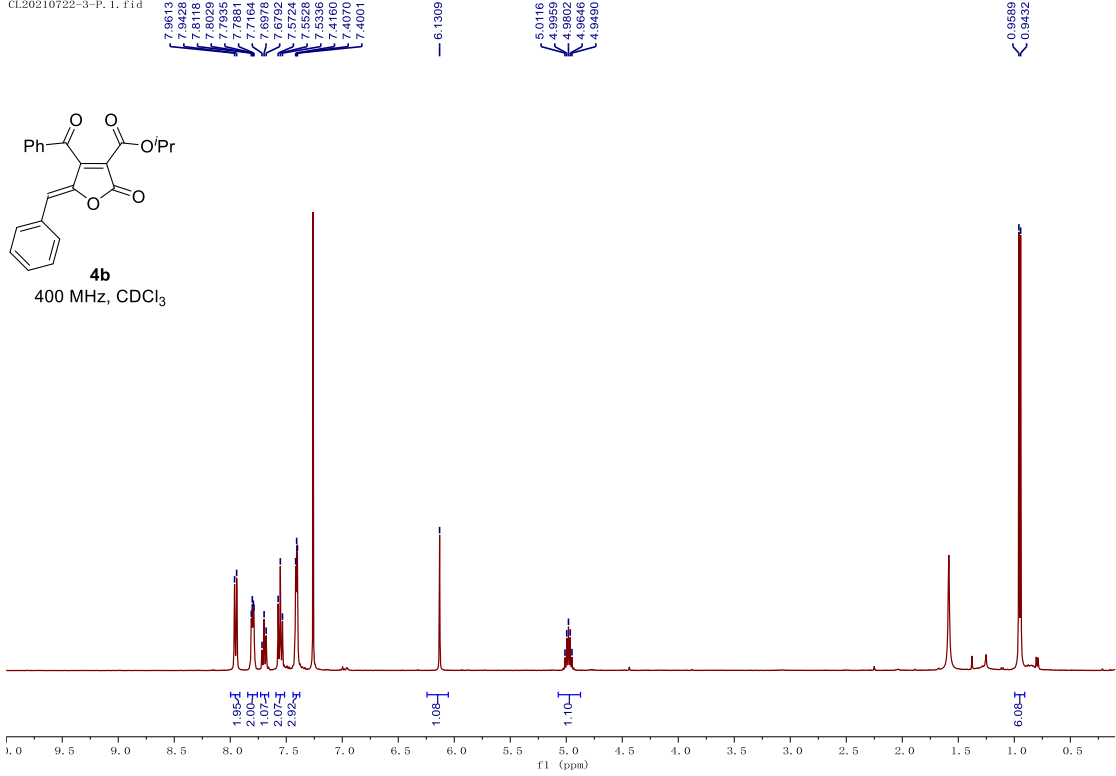

CL20210722-3-P-C. 2. f1.d

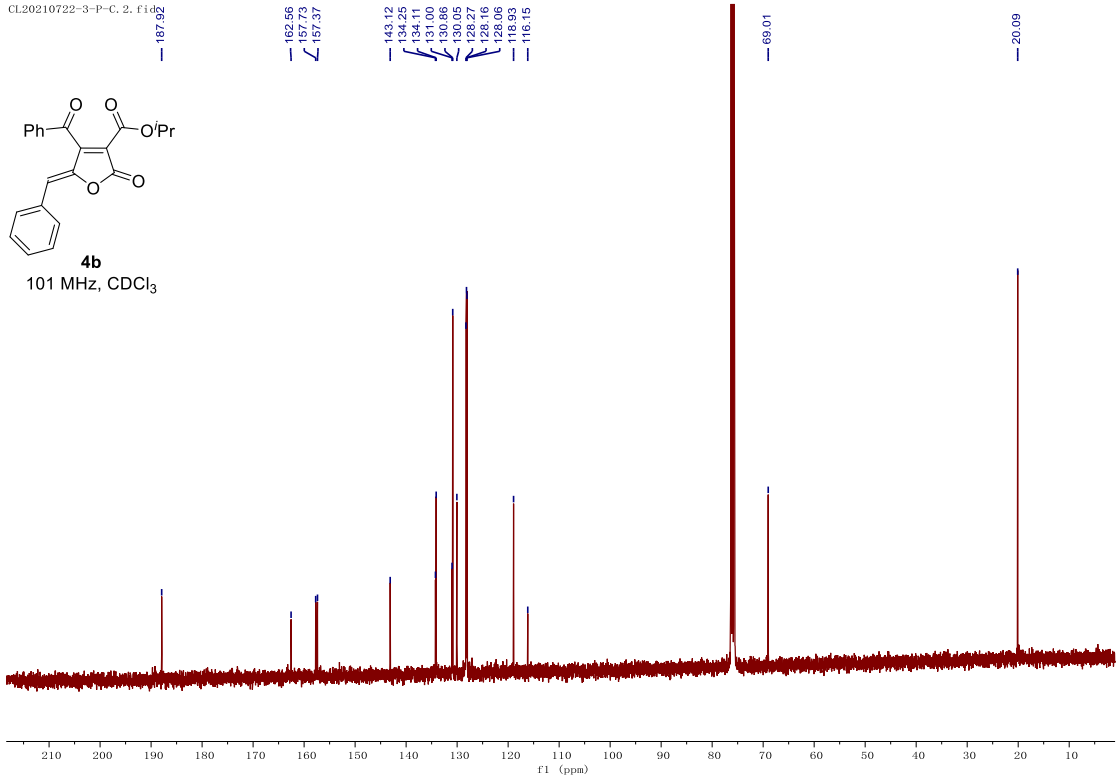



c120210728-1-p. 1. fid

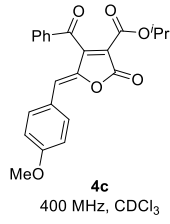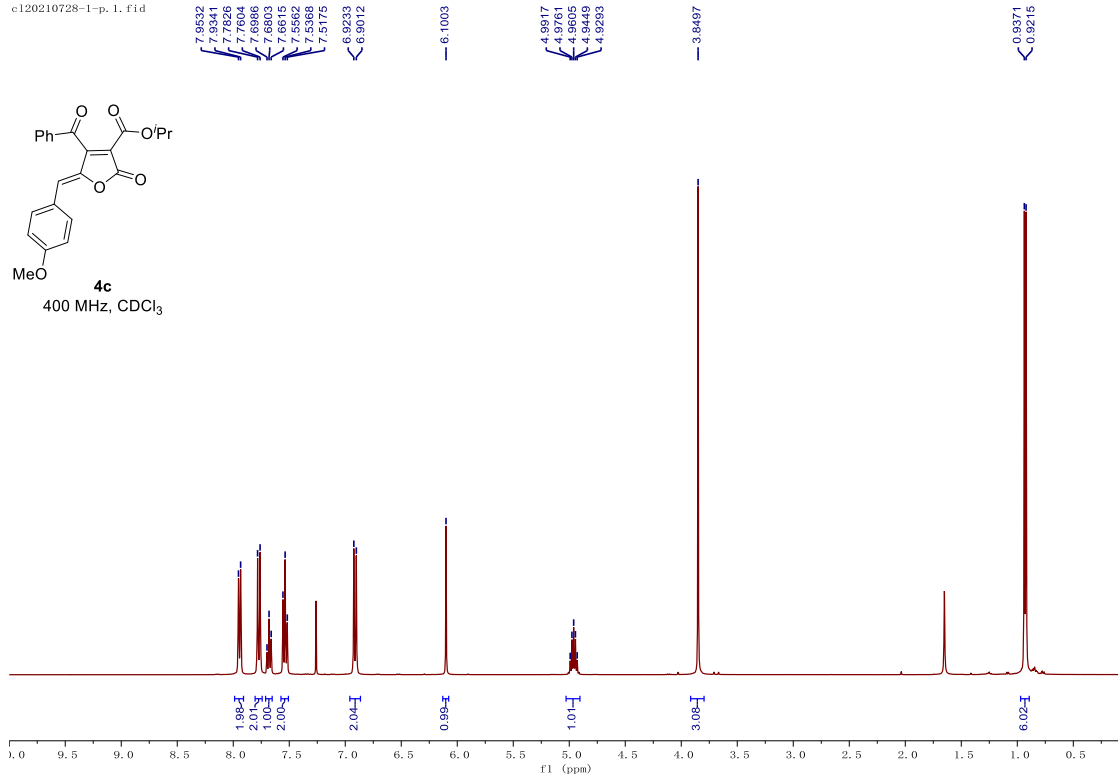

c120210728-1-p. 2. fid

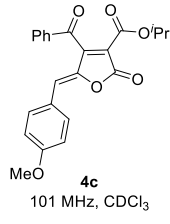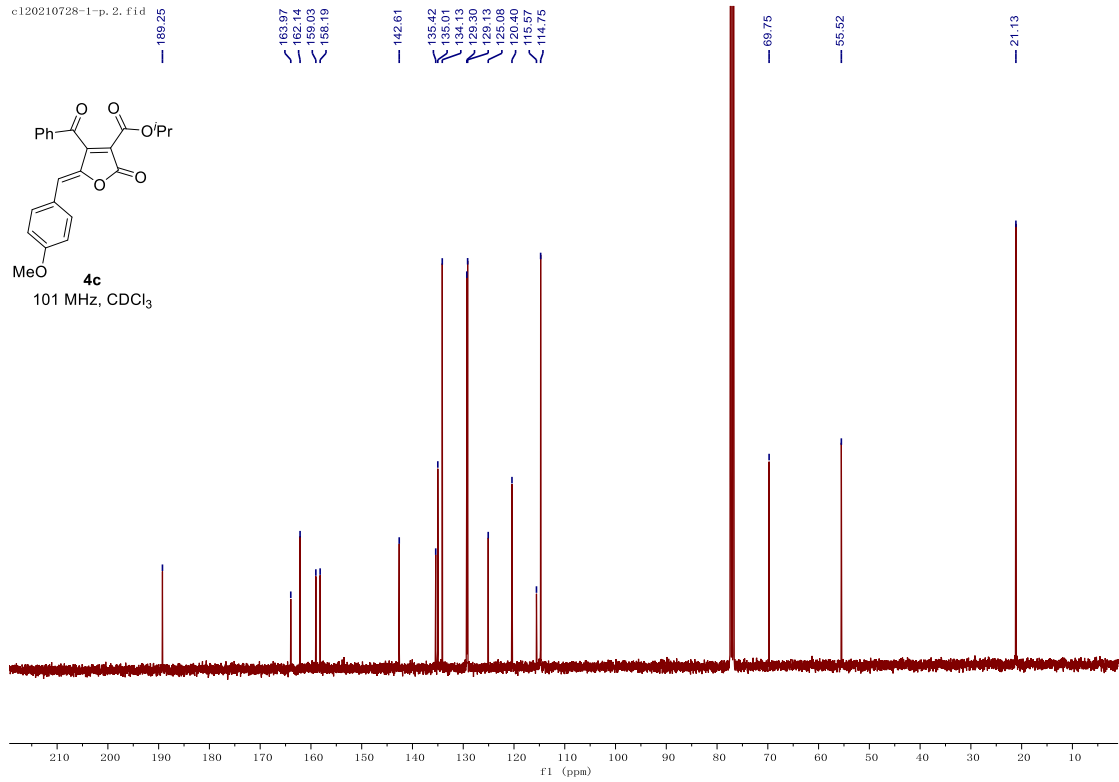

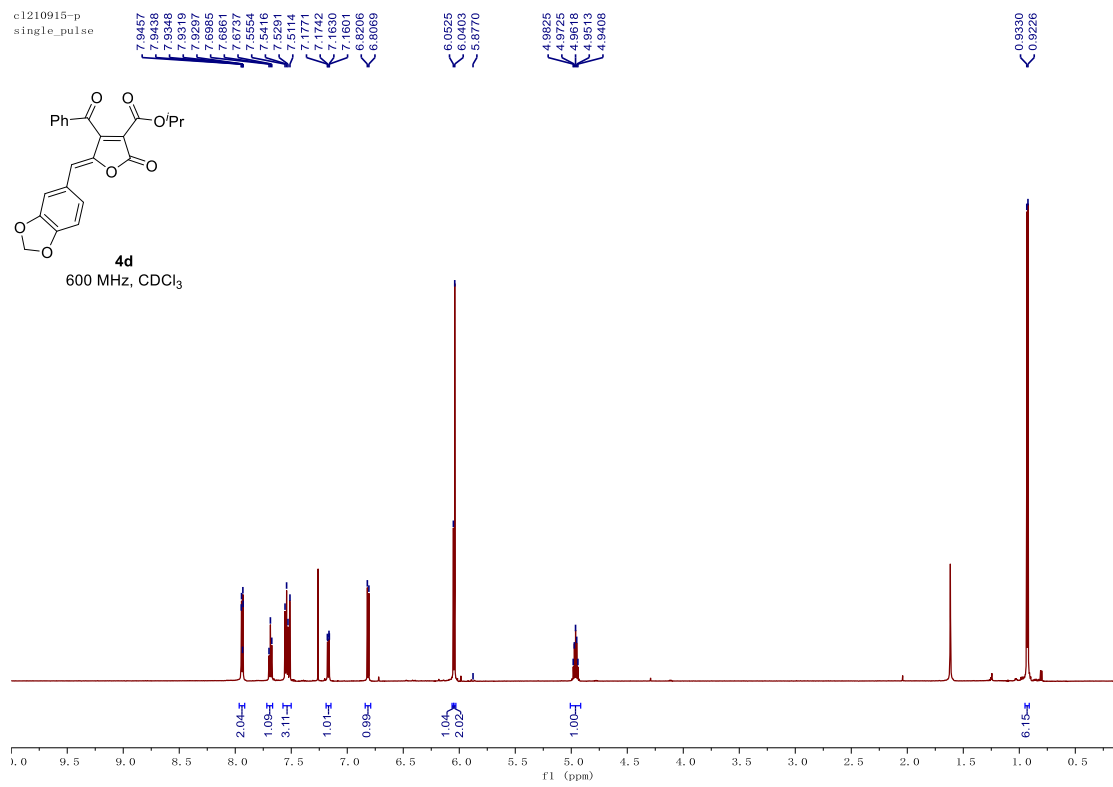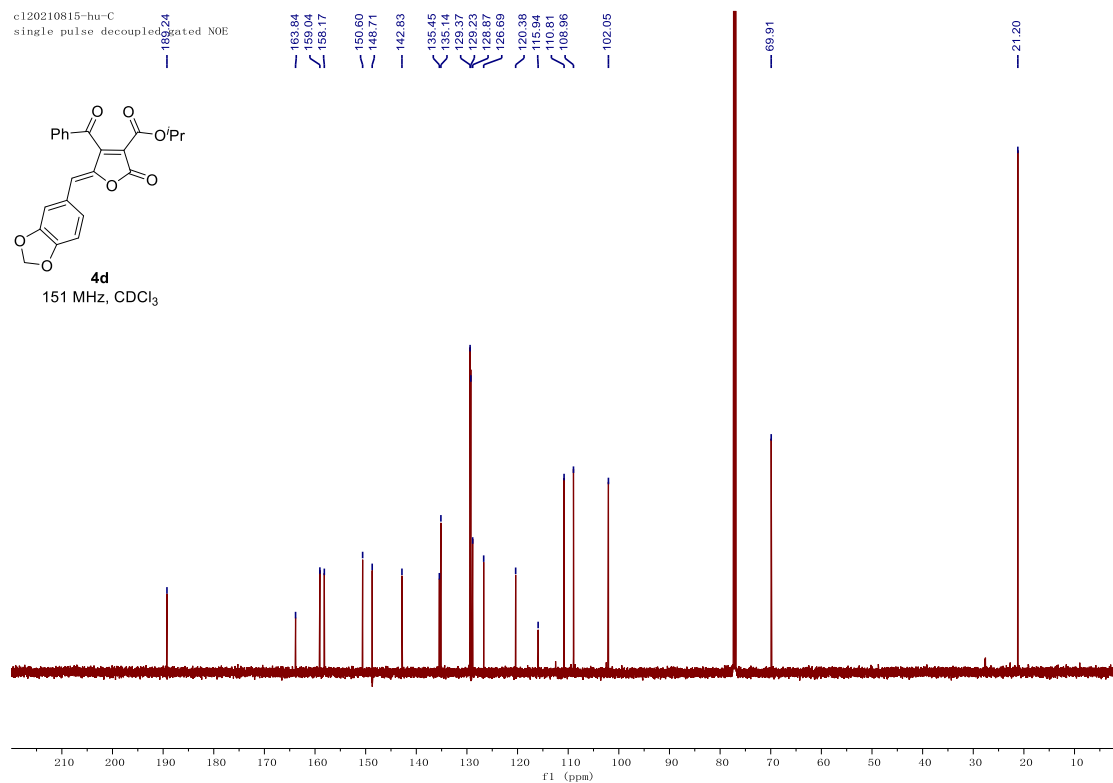

c120210825-1-p  
single\_pulse

8.2985  
8.2867  
8.2863  
8.2835  
7.9586  
7.944  
7.9425  
7.6959  
7.6938  
7.6917  
7.6840  
7.6829  
7.6814  
7.6788  
7.6778  
7.6711  
7.6690  
7.6668  
7.5553  
7.5428  
7.5416  
7.5291  
7.3866  
7.3837  
7.3742  
7.3726  
7.3715  
7.3699  
7.3689  
7.3575  
7.0443  
7.0435  
7.0426  
7.0418  
7.0311  
7.0303  
6.9934  
7.0294  
7.0188  
7.0180  
7.0170  
7.0162  
6.8651  
6.8641  
6.8631  
6.8397  
6.7311  
4.9888  
4.9794  
4.8879  
4.8875  
4.9375  
3.7689

0.9456  
0.9352

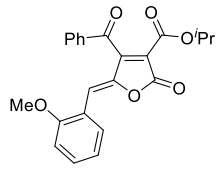

**4e**

600 MHz, CDCl<sub>3</sub>

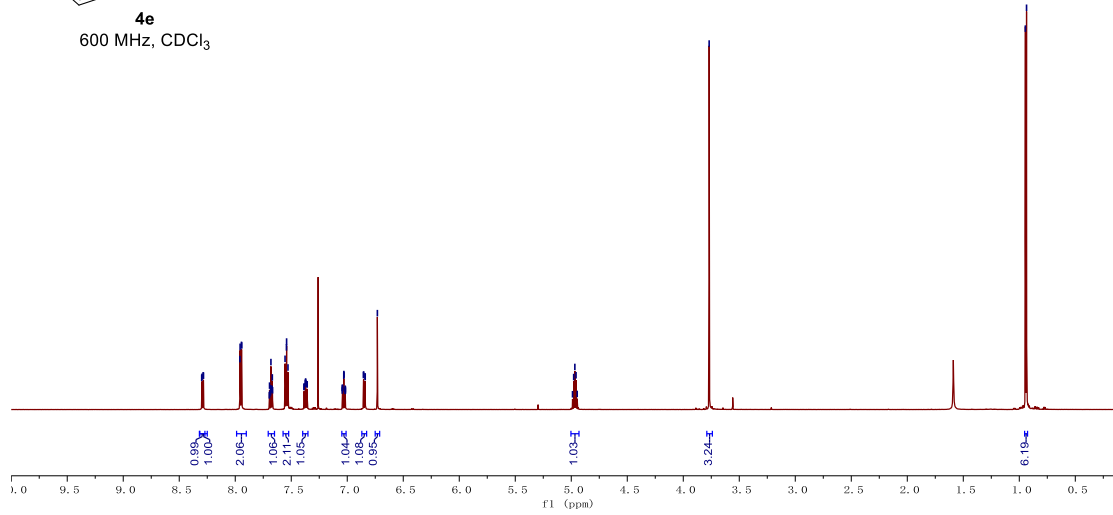

c120210825-1-p  
single\_pulse decoupled gated NOE

166.18  
164.01  
159.07  
156.63  
143.94  
135.62  
134.96  
133.03  
132.69  
129.40  
128.15  
121.36  
116.47  
114.41  
110.79  
69.90  
55.69  
21.20

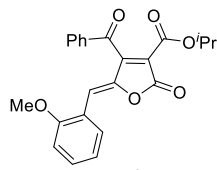

**4e**

151 MHz, CDCl<sub>3</sub>

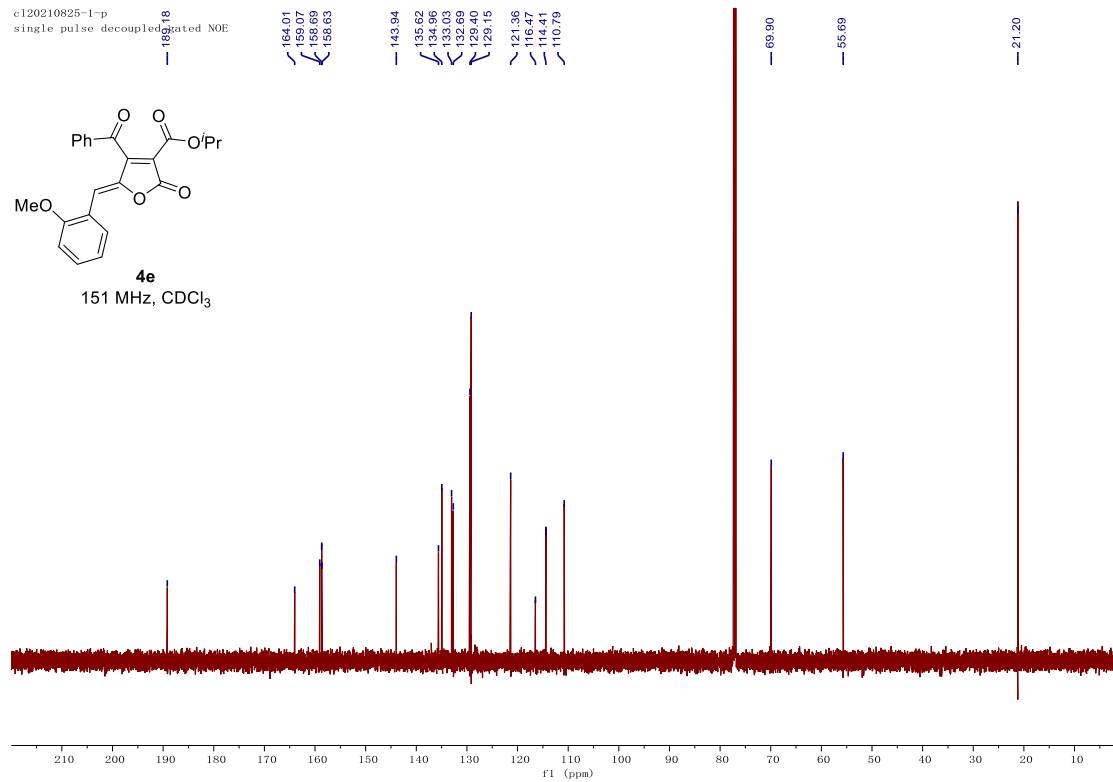

c120210908-p. 1. fid

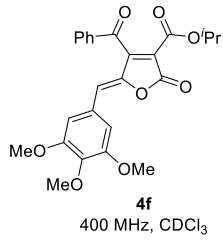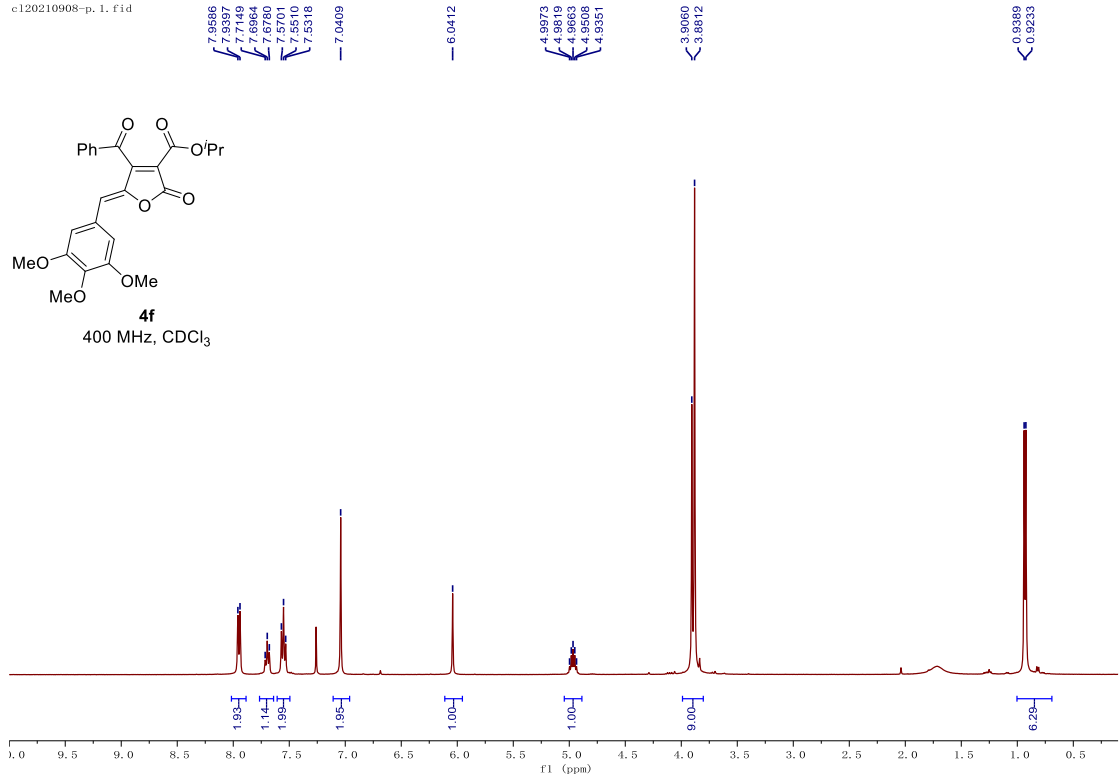

c120210908-p  
single pulse decoupled NOE

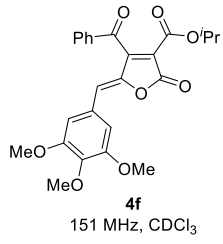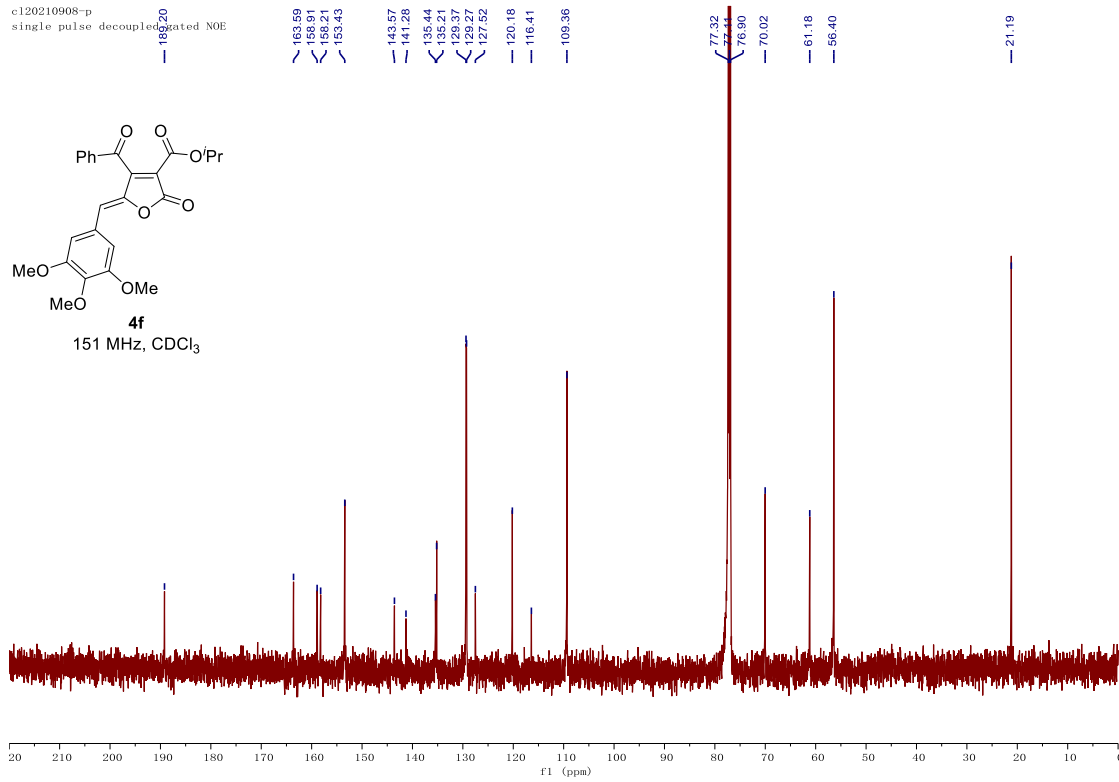

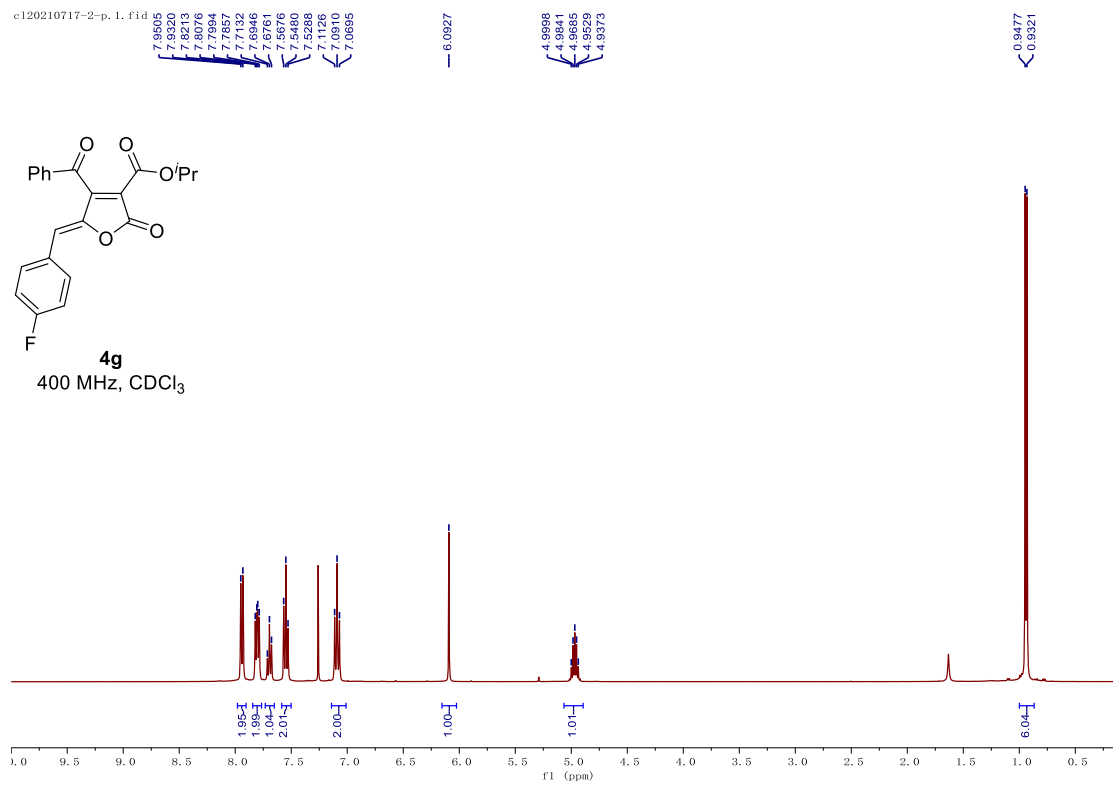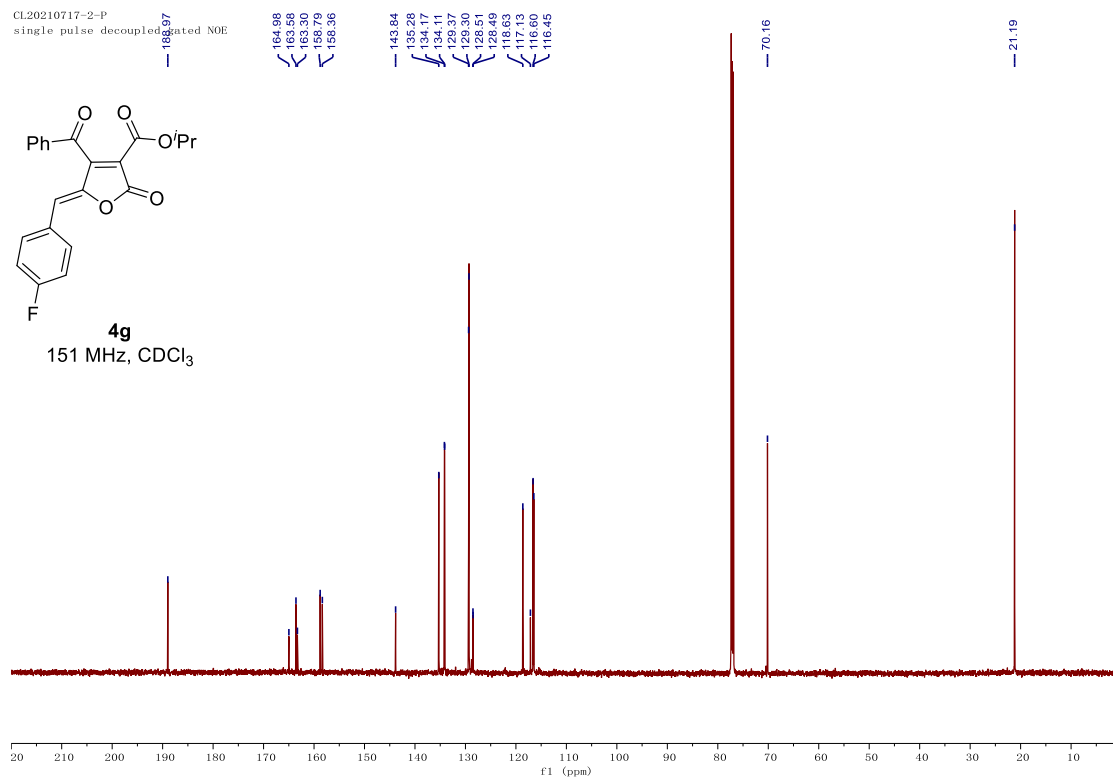

c120210731-1-p. 1. fid

7.9177  
7.8980  
7.7793  
7.7787  
7.7792  
7.7740  
7.4015  
7.3824  
7.3869  
7.0098  
6.9882

6.1245

5.0373  
5.0365  
5.0365  
4.9909  
4.9754  
4.9600

3.9007

0.8997  
0.8846

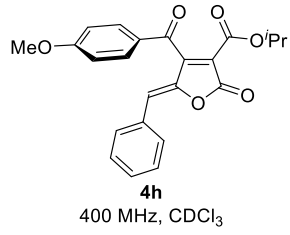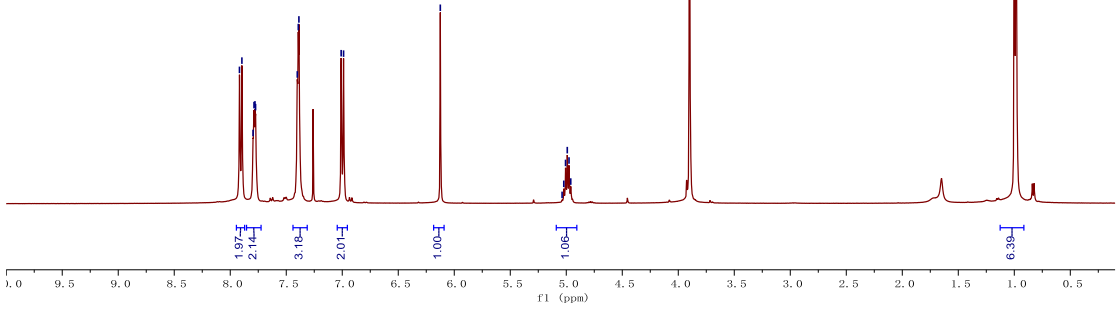

c120210731-1-0Me. 1. fid

187.21  
165.18  
163.71  
168.91  
168.89

144.32

132.09  
131.83  
130.96  
129.06  
128.45

119.76  
116.88  
114.46

69.91

55.77

21.23

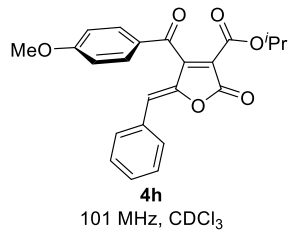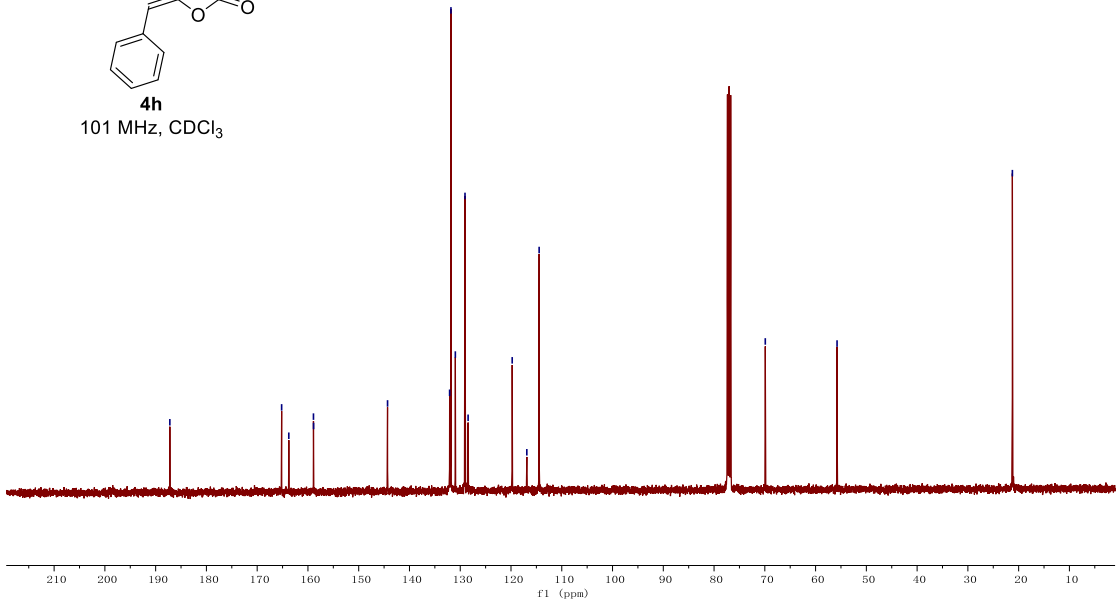

c120210919-2-p. 2. fid

7.8225  
7.8010  
7.7832  
7.7749  
7.6872  
7.4134  
7.4056  
7.3976

6.0901

5.0314  
5.0158  
5.0001  
4.9845  
4.9689

1.0193  
1.0037

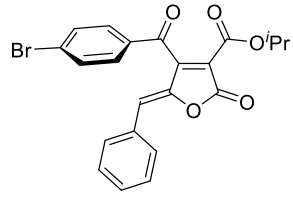

**4i**

400 MHz, CDCl<sub>3</sub>

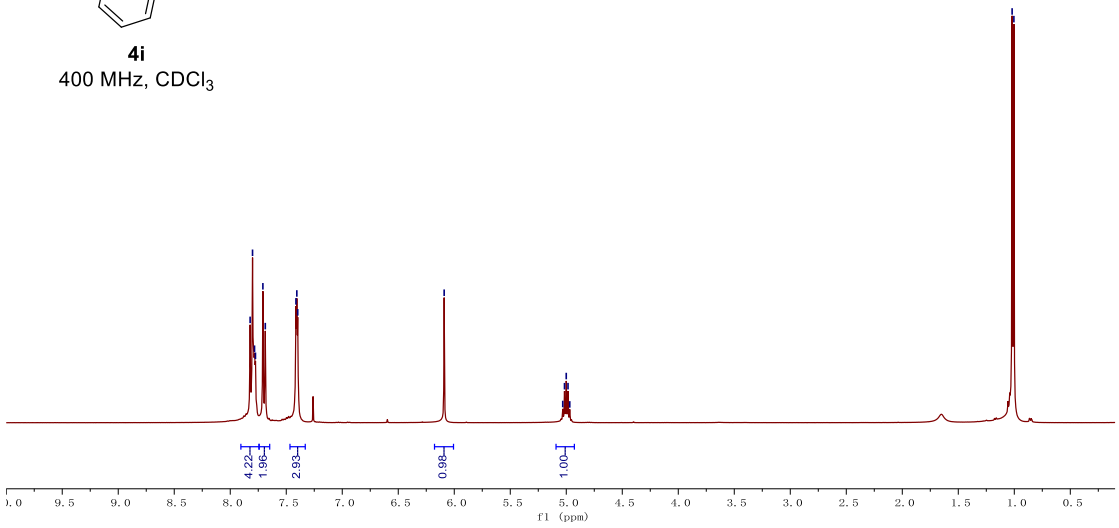

c120210919-p-c. 1. fid

188.03

163.32  
157.97

143.95

134.02  
132.62  
131.92  
130.74  
130.58  
129.14  
120.05  
117.39

70.24

21.26

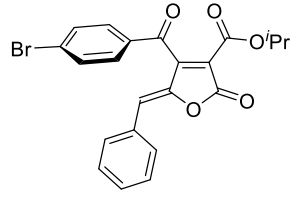

**4i**

101 MHz, CDCl<sub>3</sub>

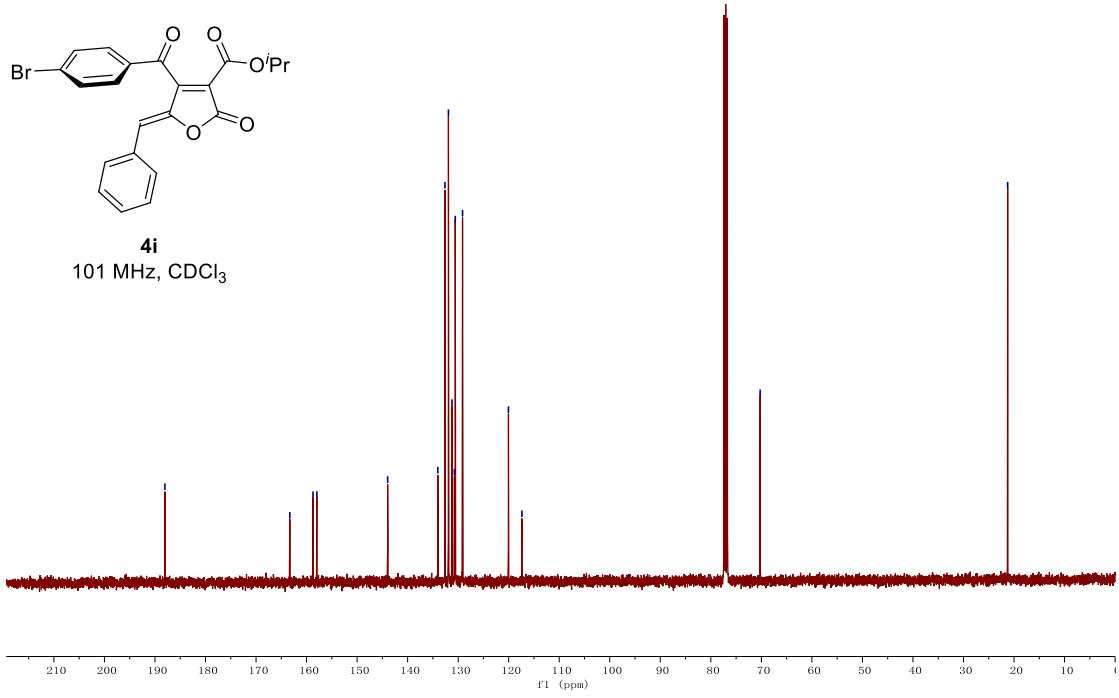

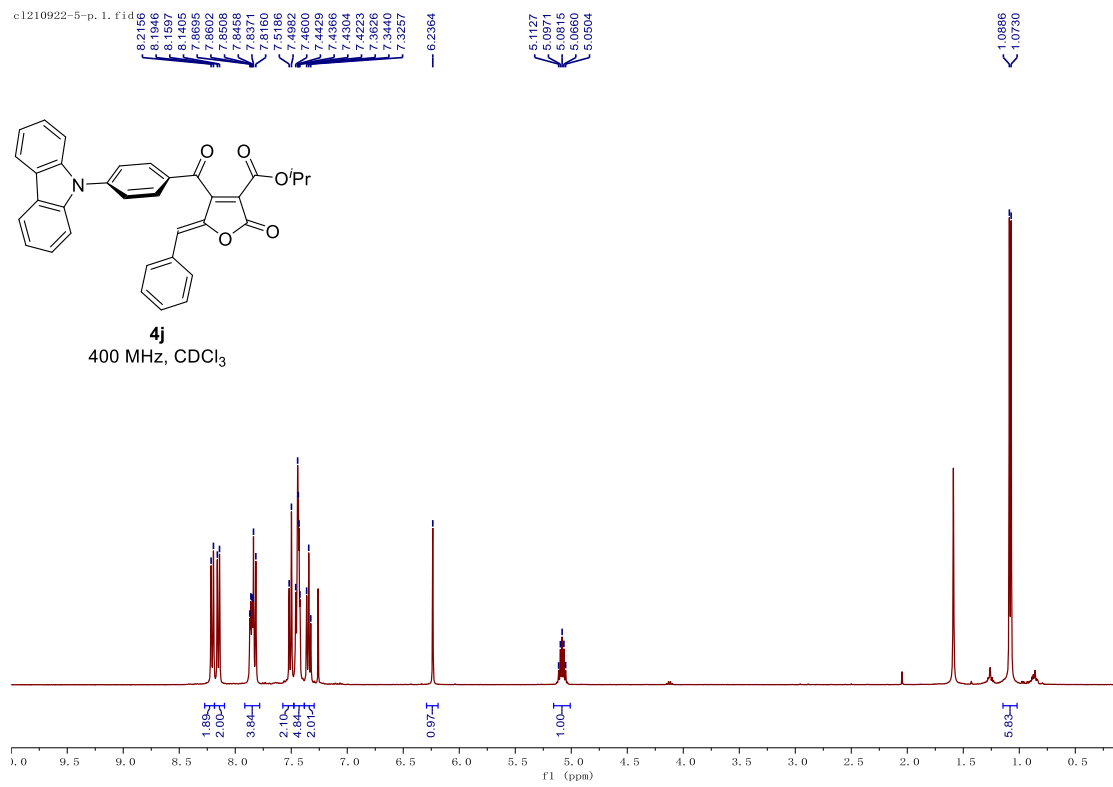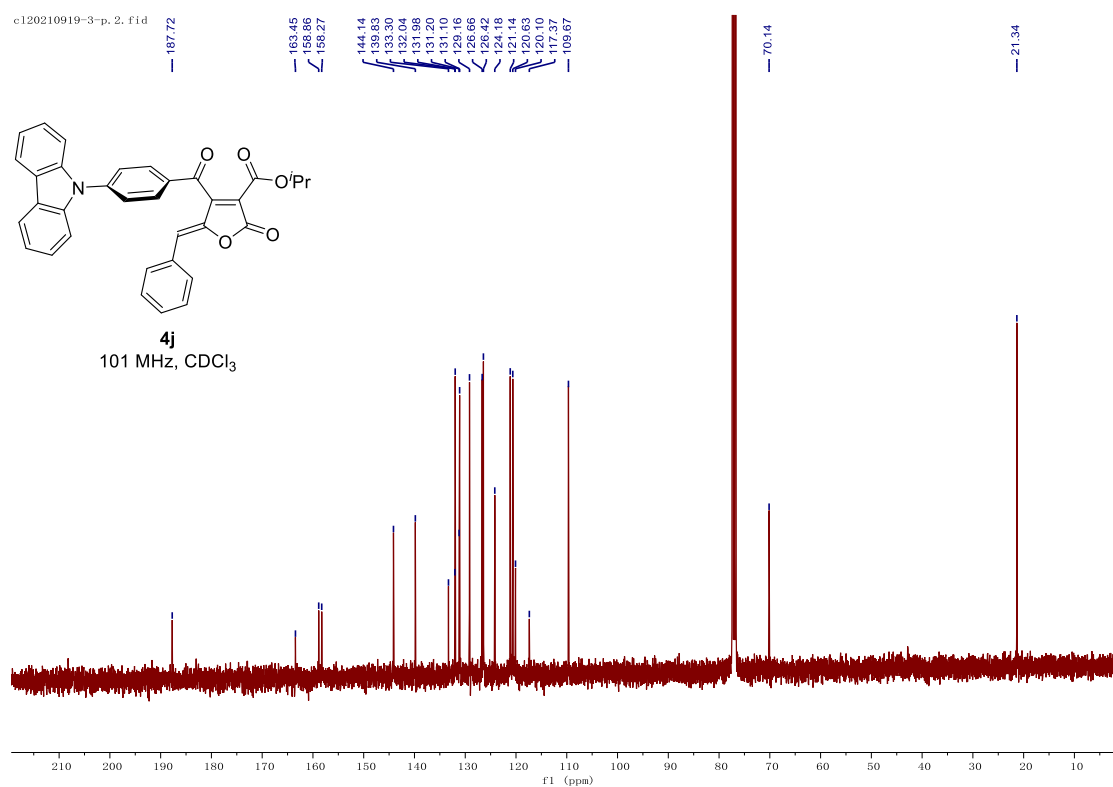



c120211102-p. 1. fid

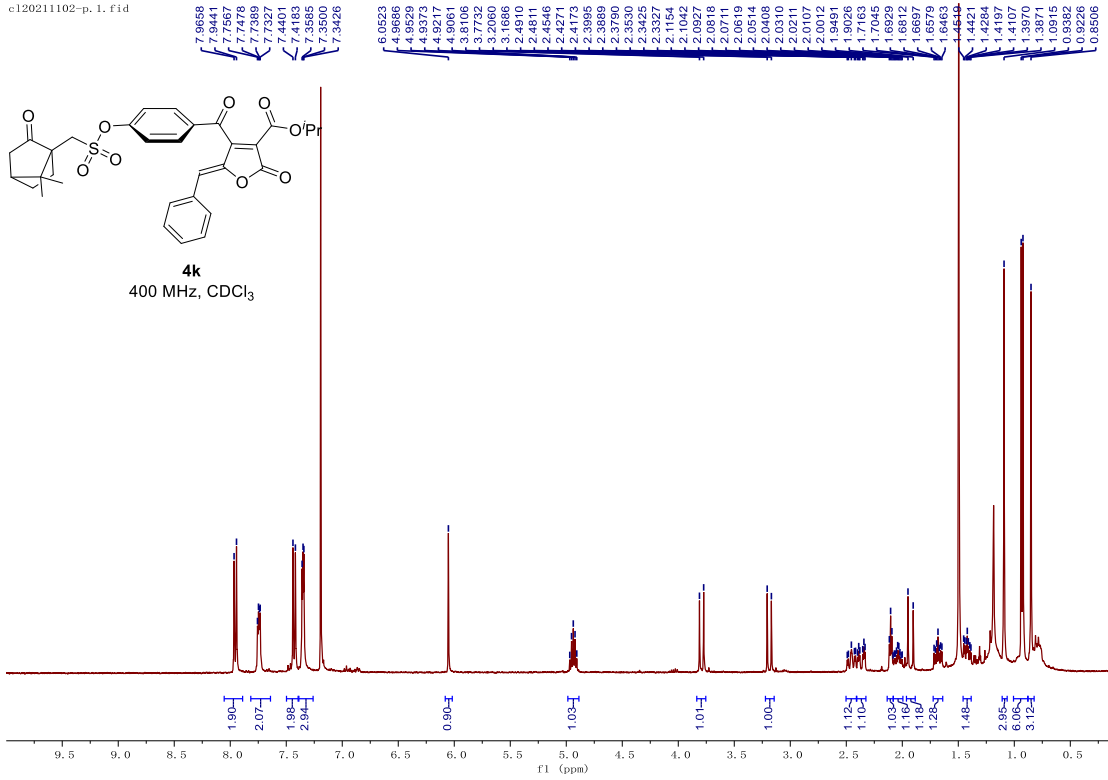

c120211031-p  
singlet pulse decoupled

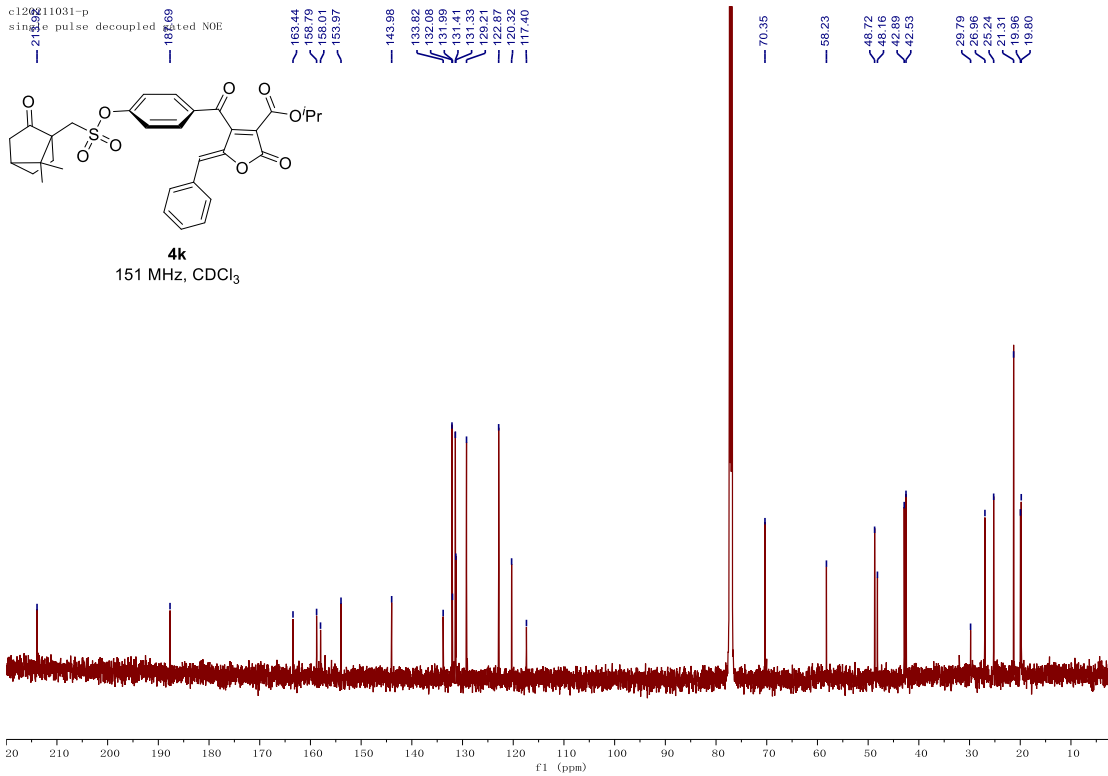

c120210717-1-p  
single\_pulse

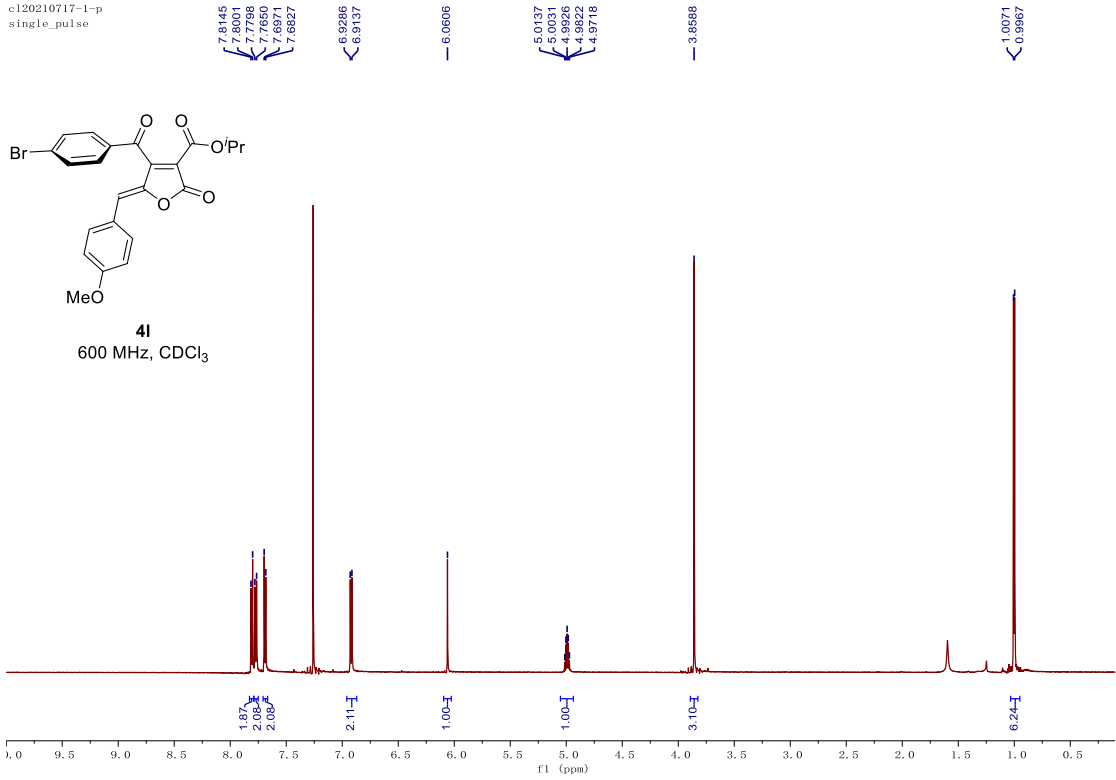

c120210717-1-p  
single\_pulse decoupled

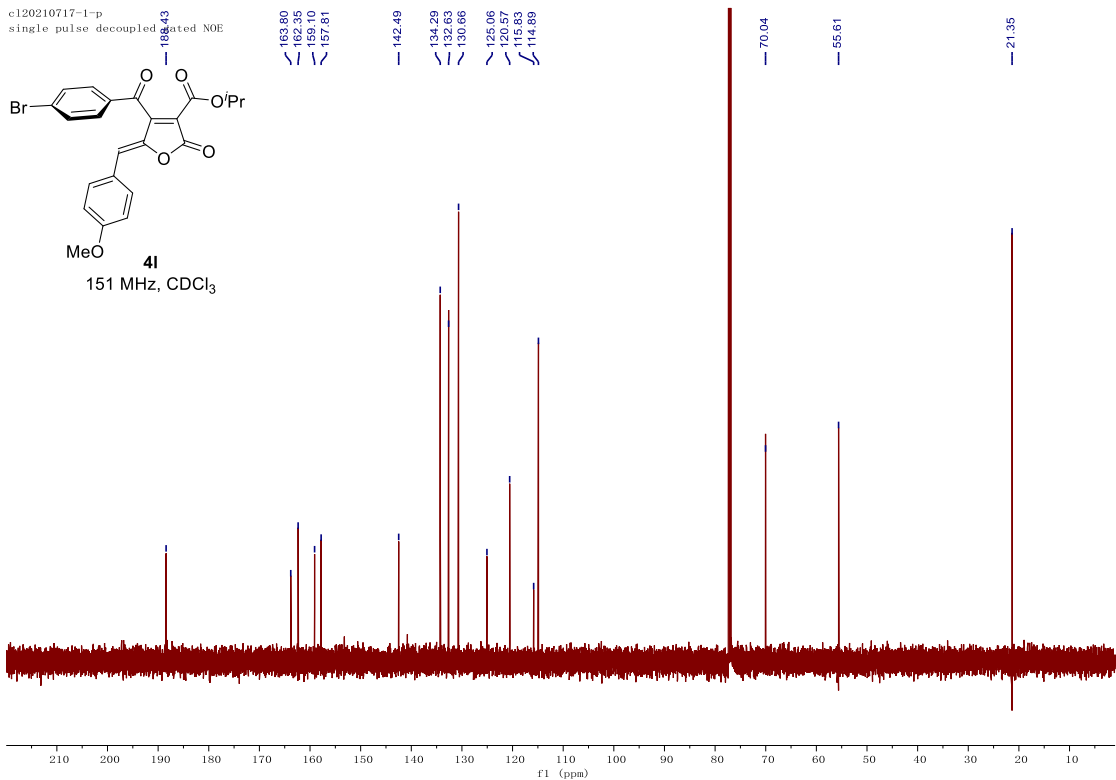

CL-211014-P. 1. fid

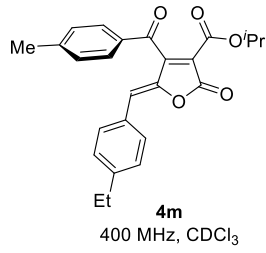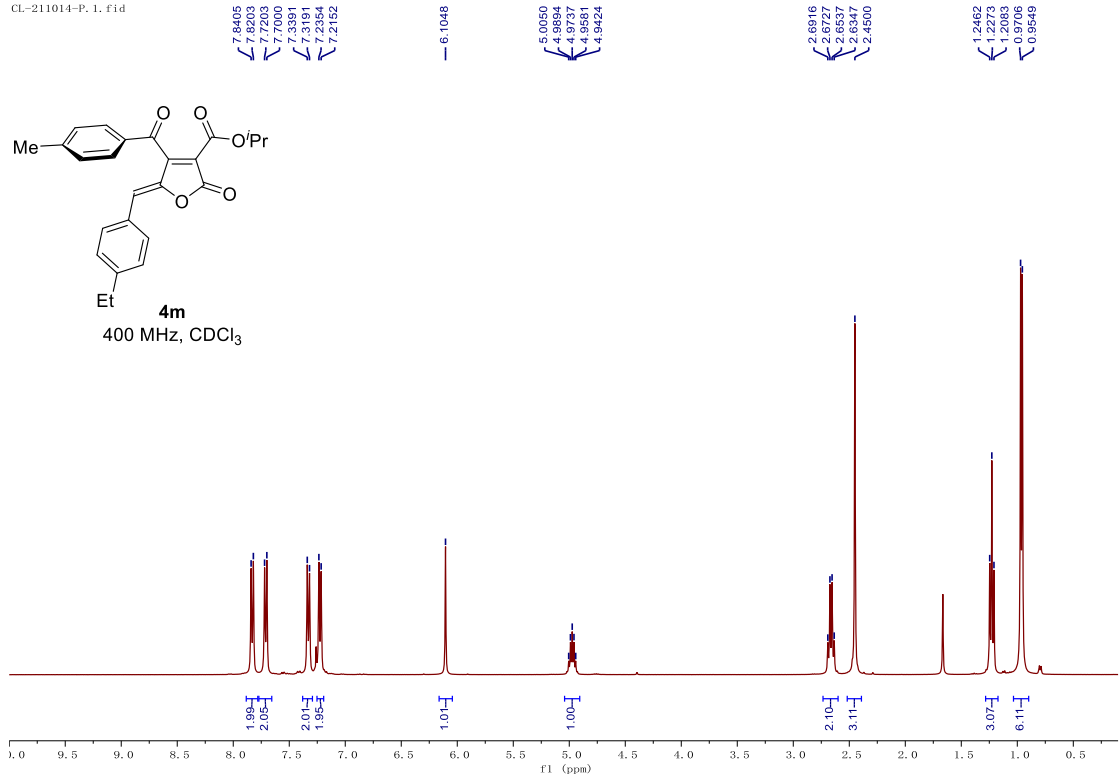

CL20211014-P-C. 1. fid

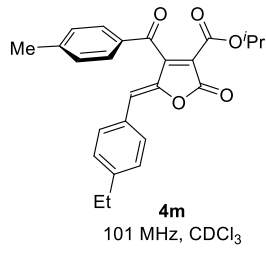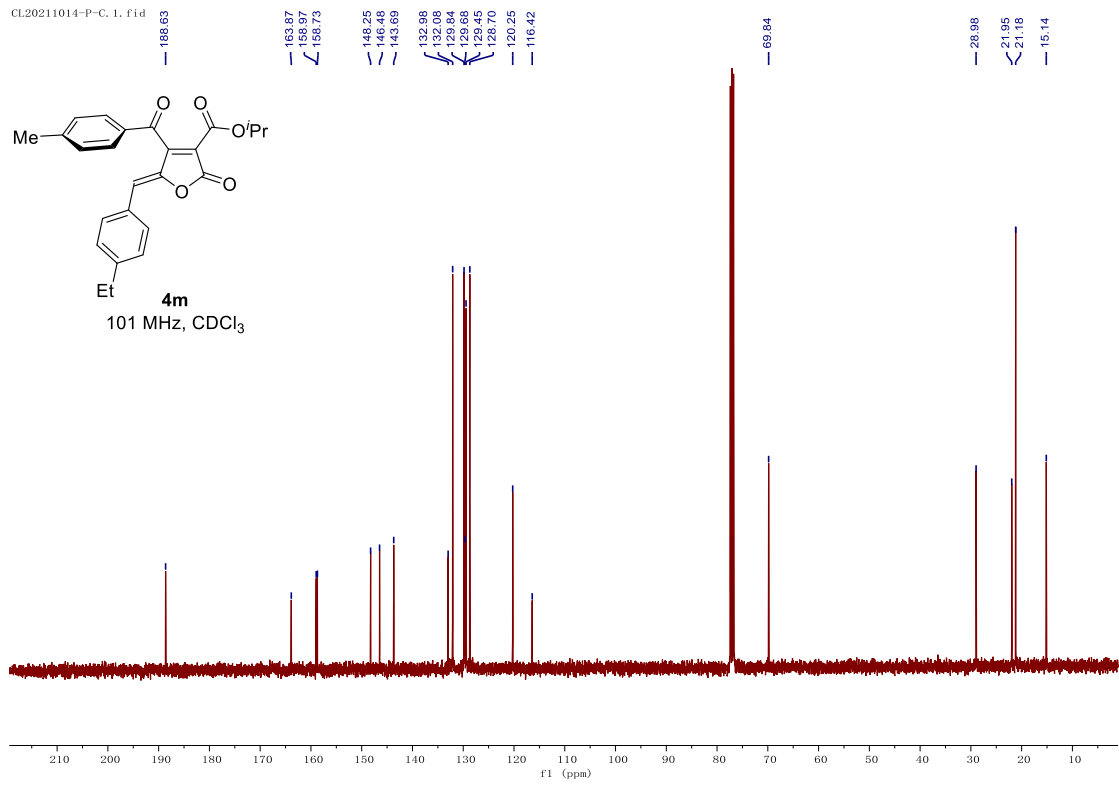

c120210918-1.1.fid

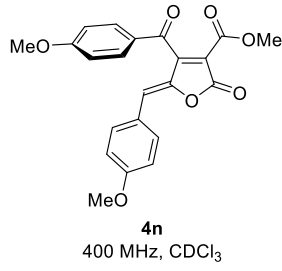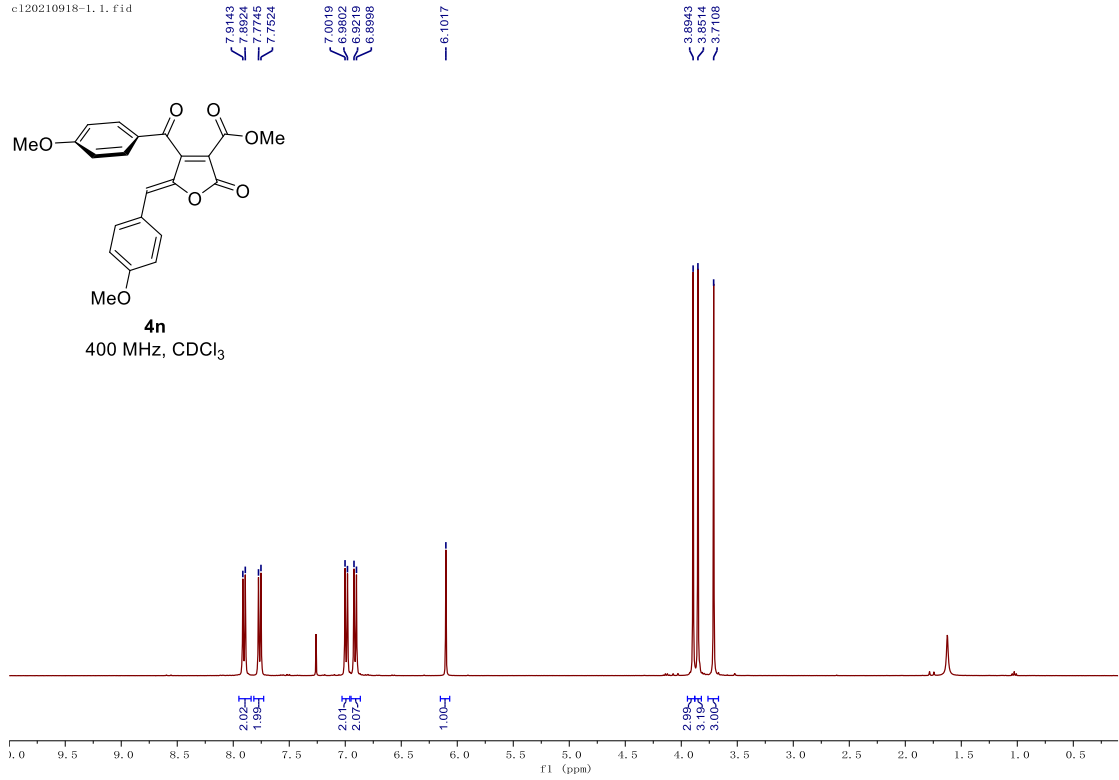

c120210918-1-p.1.fid

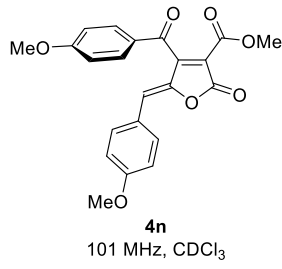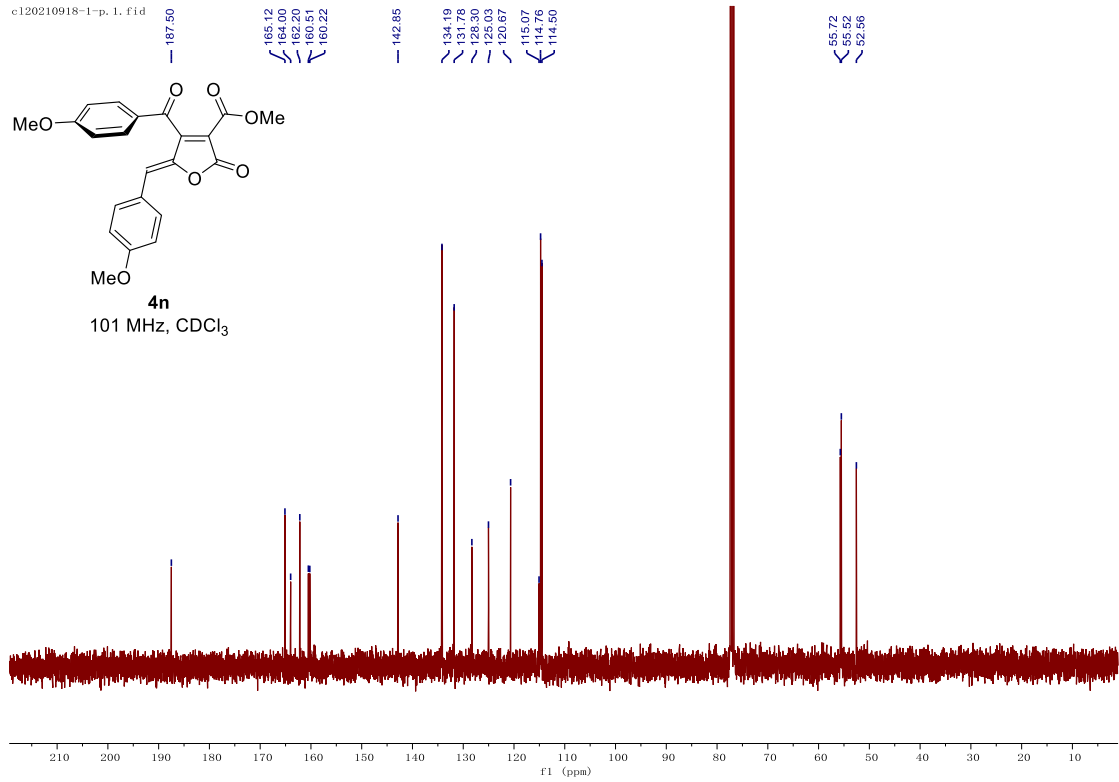

c120210918-2.1.fid

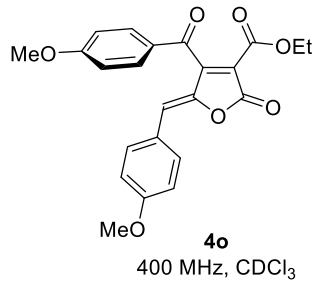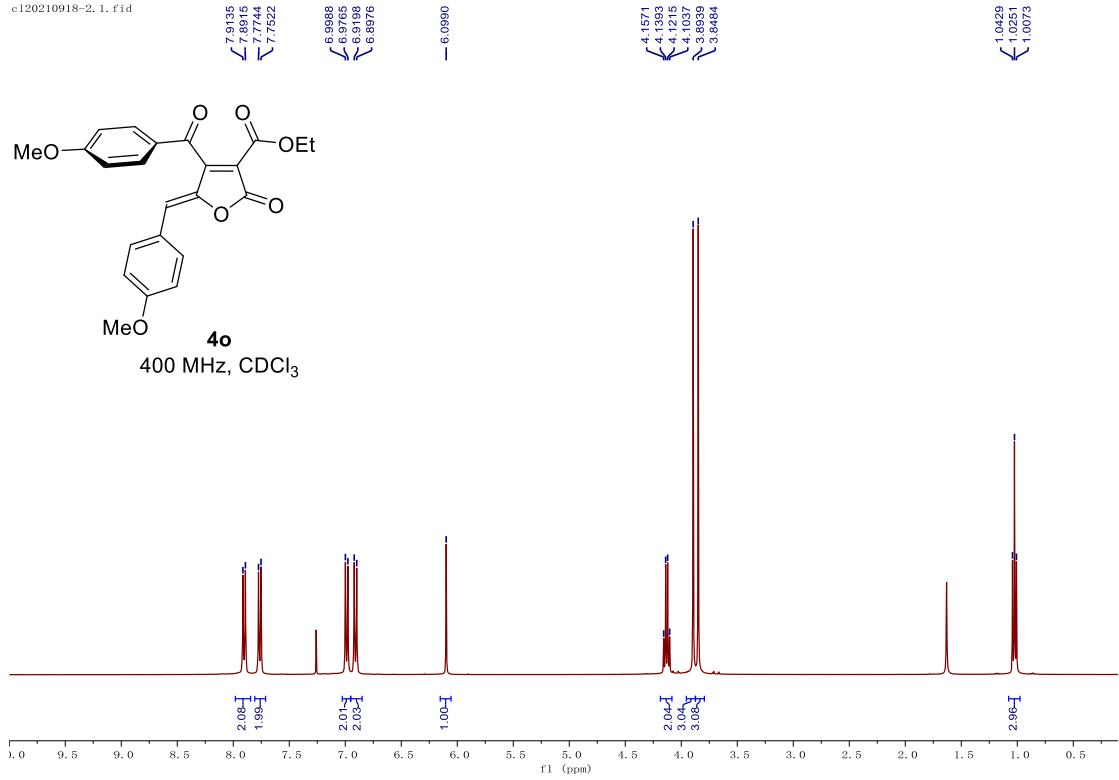

c120210918-2-p-c.1.fid

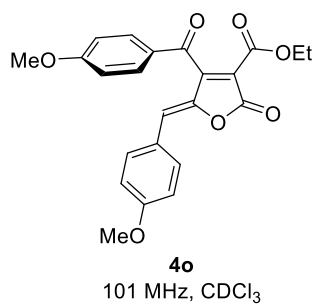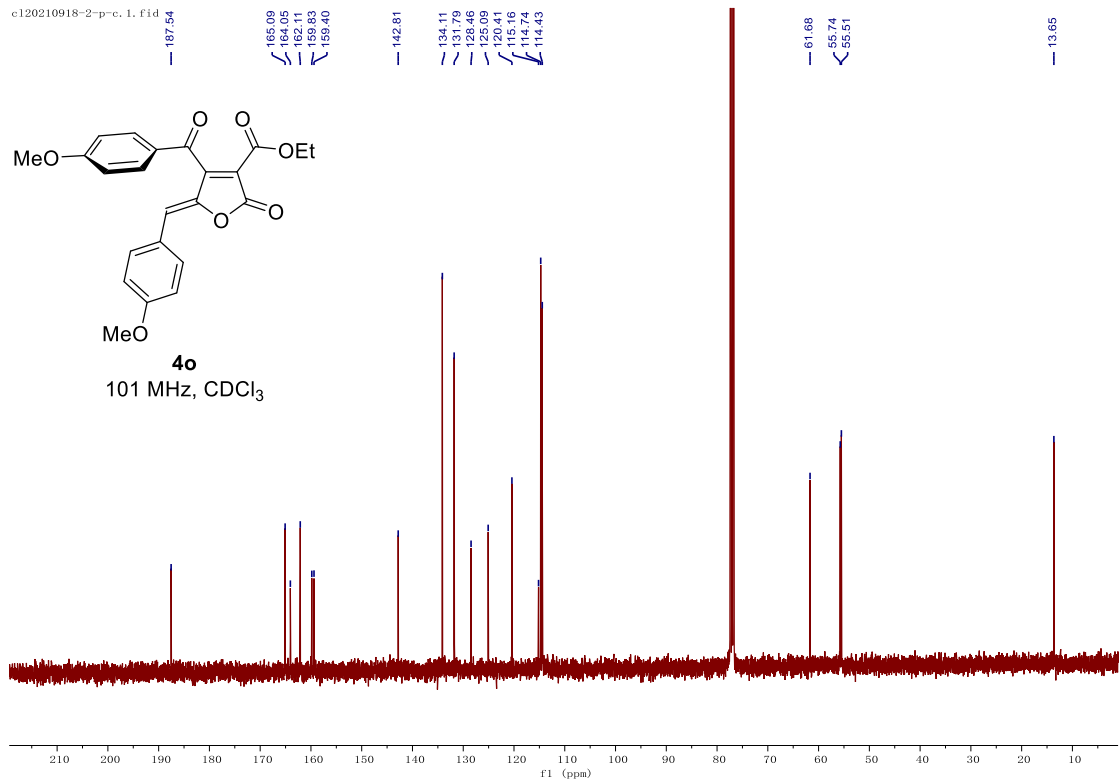

c120210918-3. 1. fid

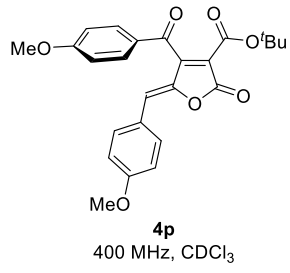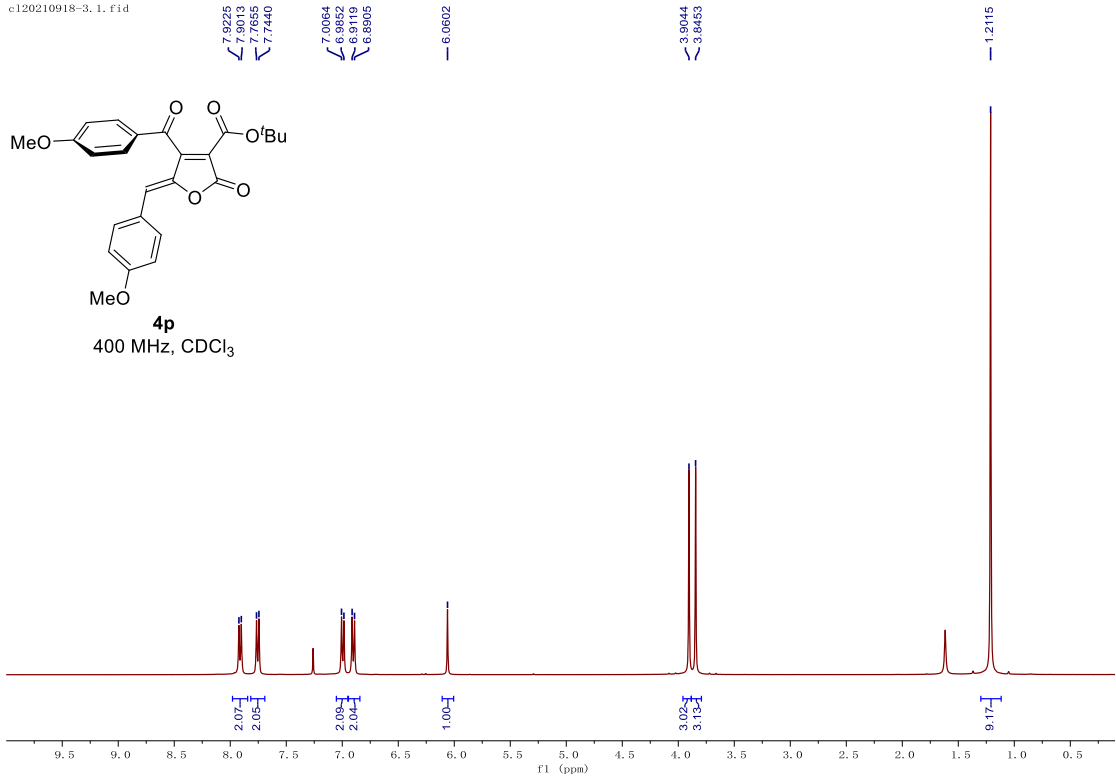

c120210919-2-p. 1. fid

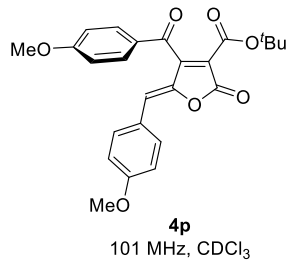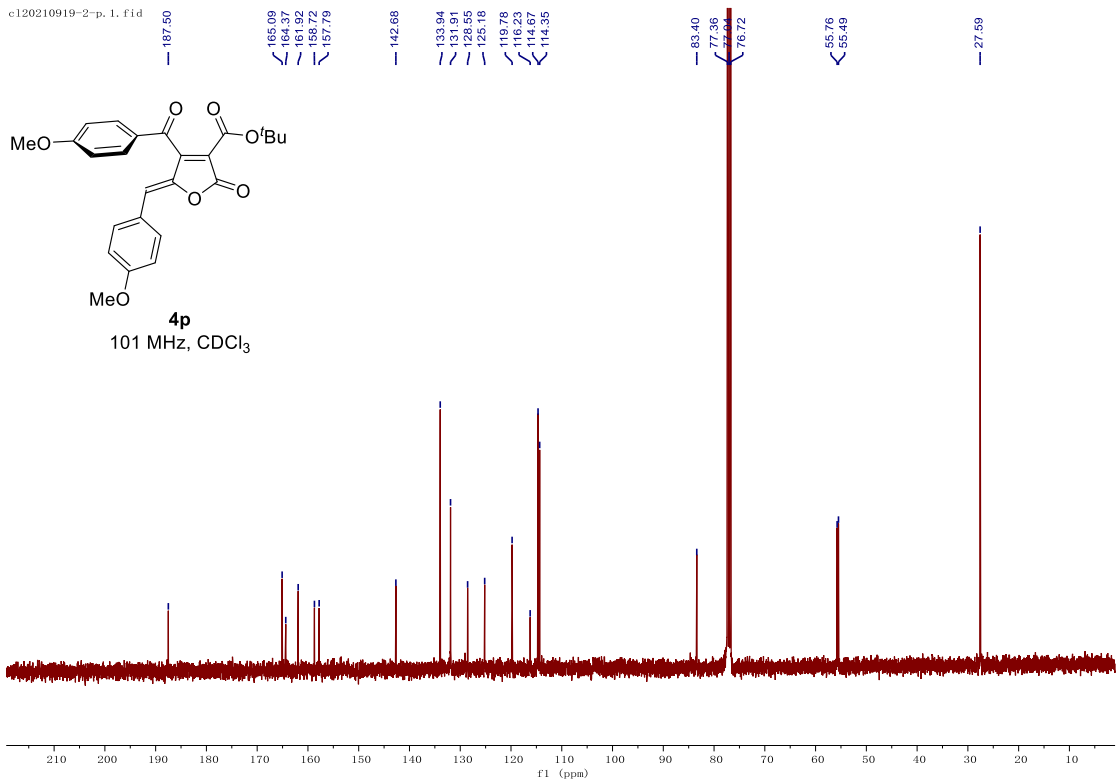

c1211014-2-p. 1. fid

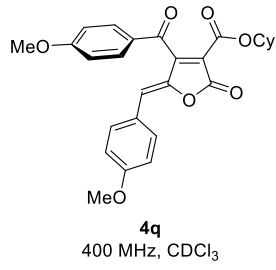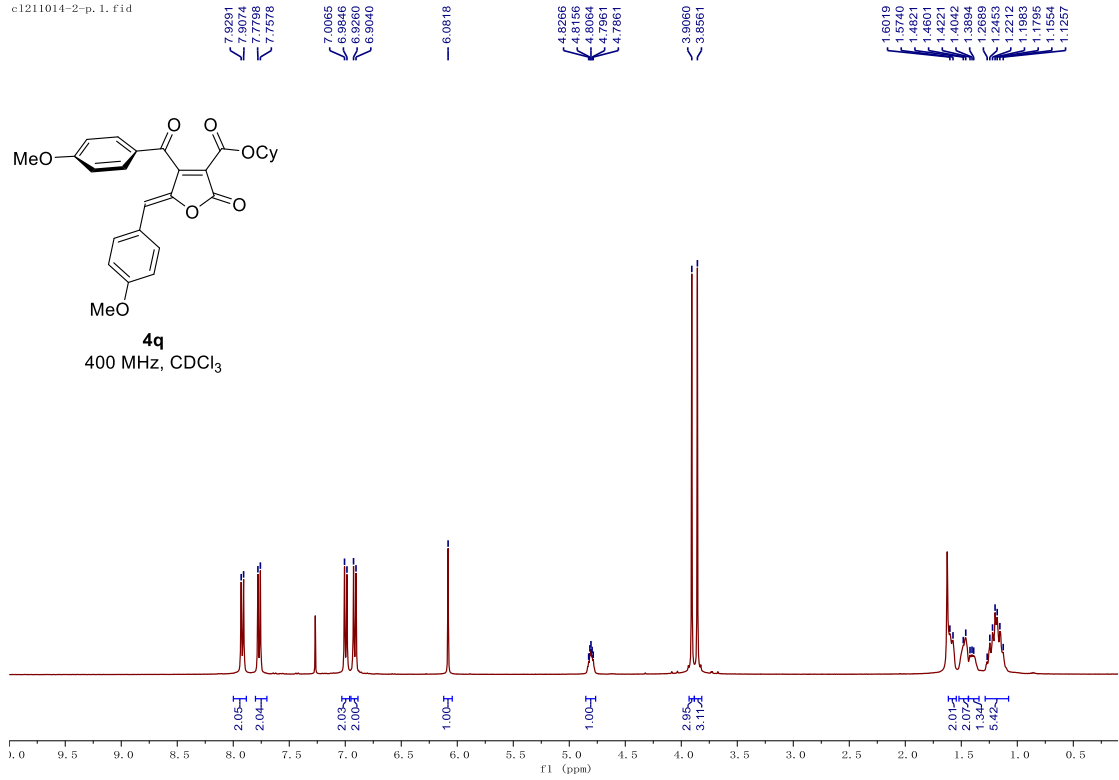

c120211015-p. 1. fid

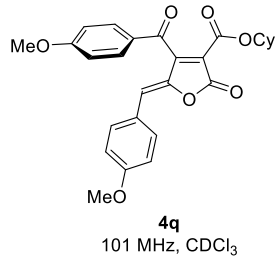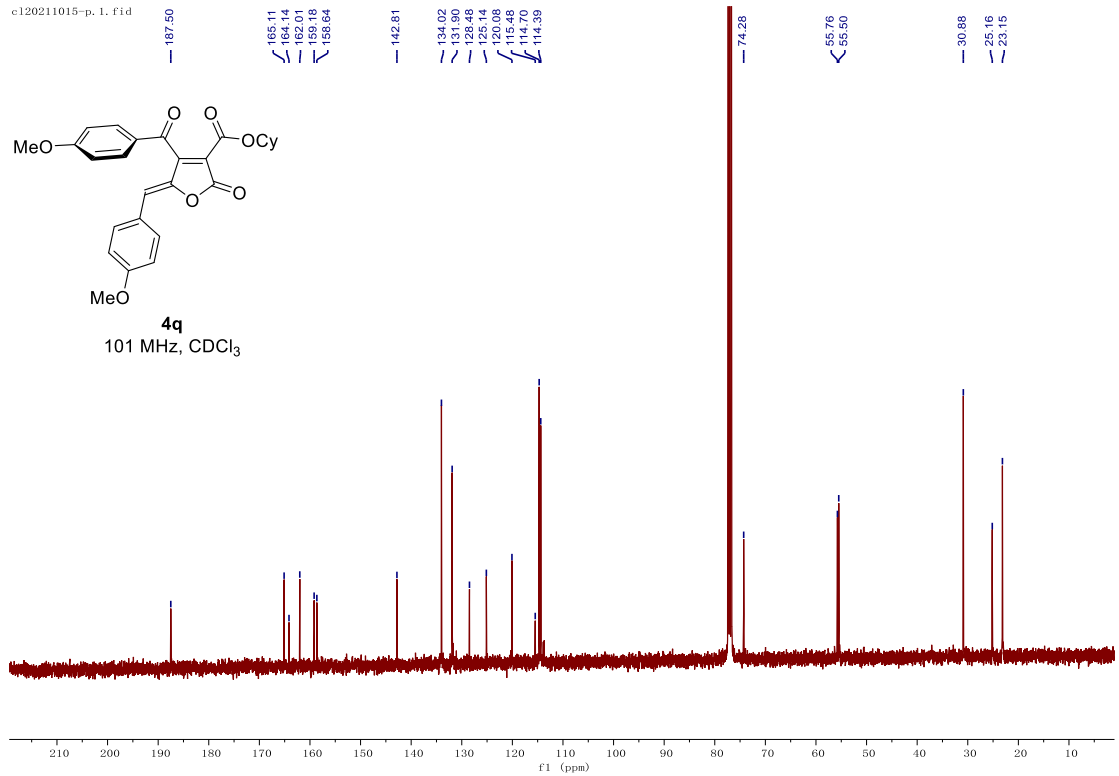

c120211112-4.1.fid

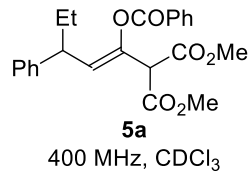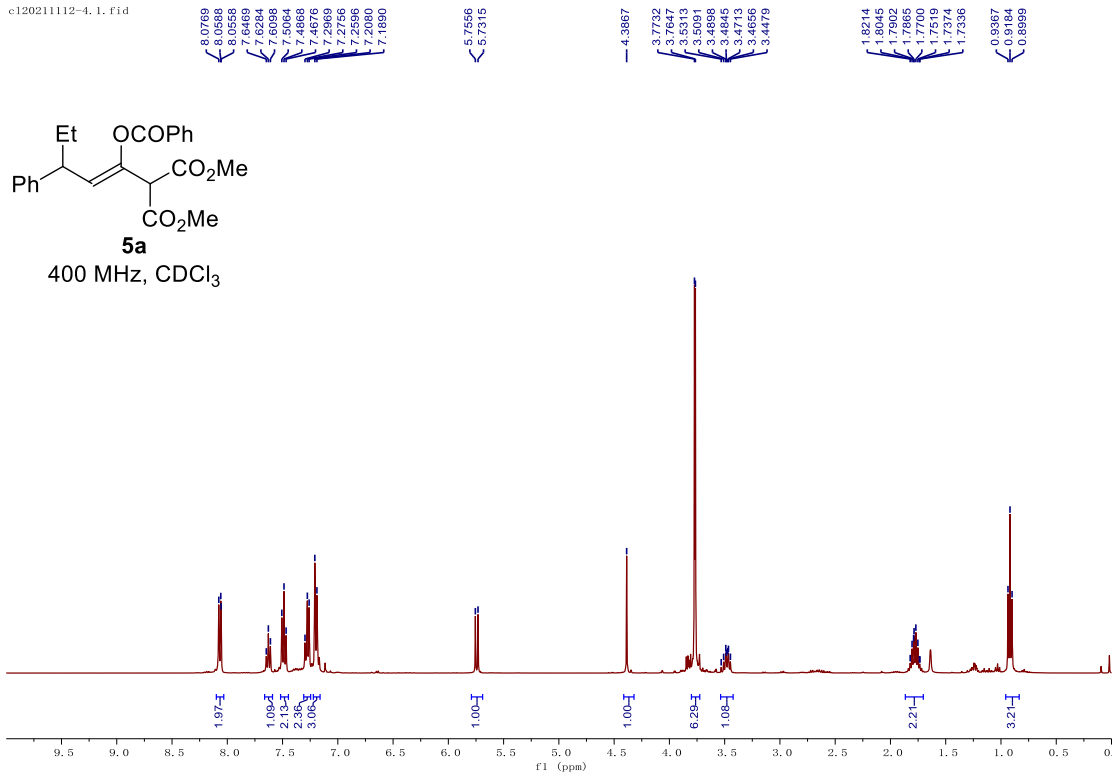

c120211112-4-C.1.fid

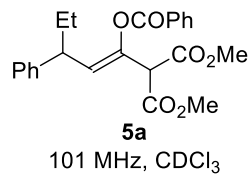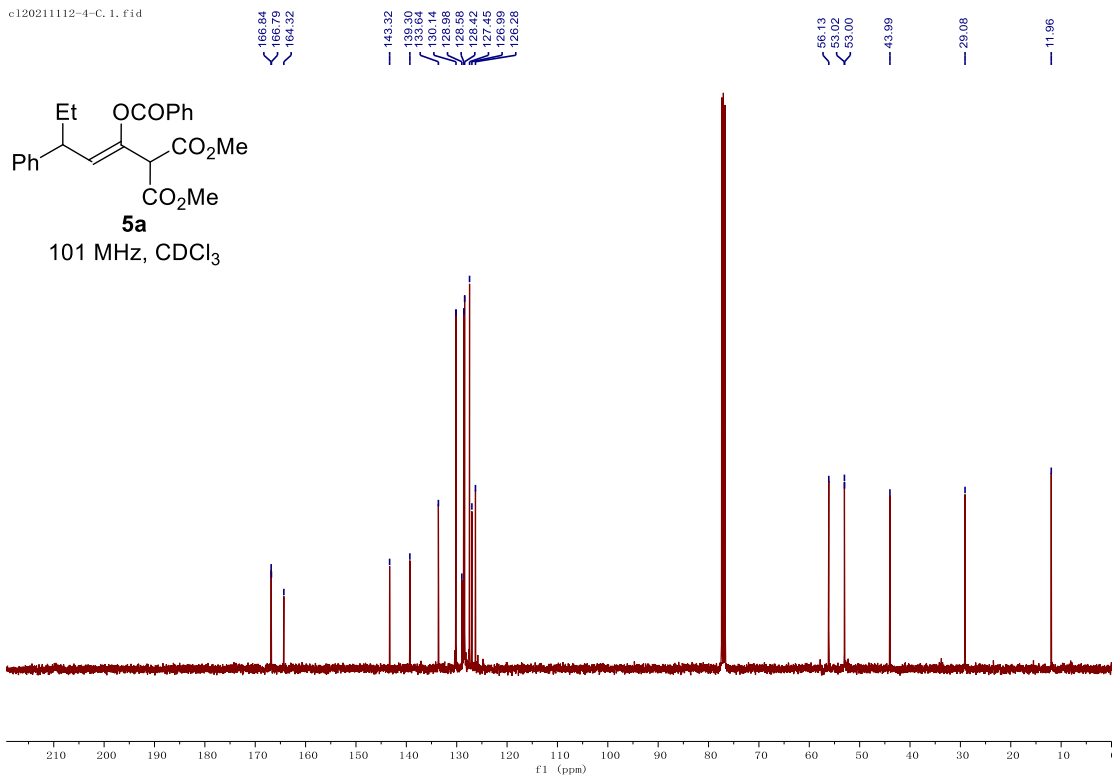



c120211119-1  
single\_pulse

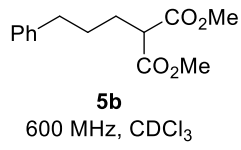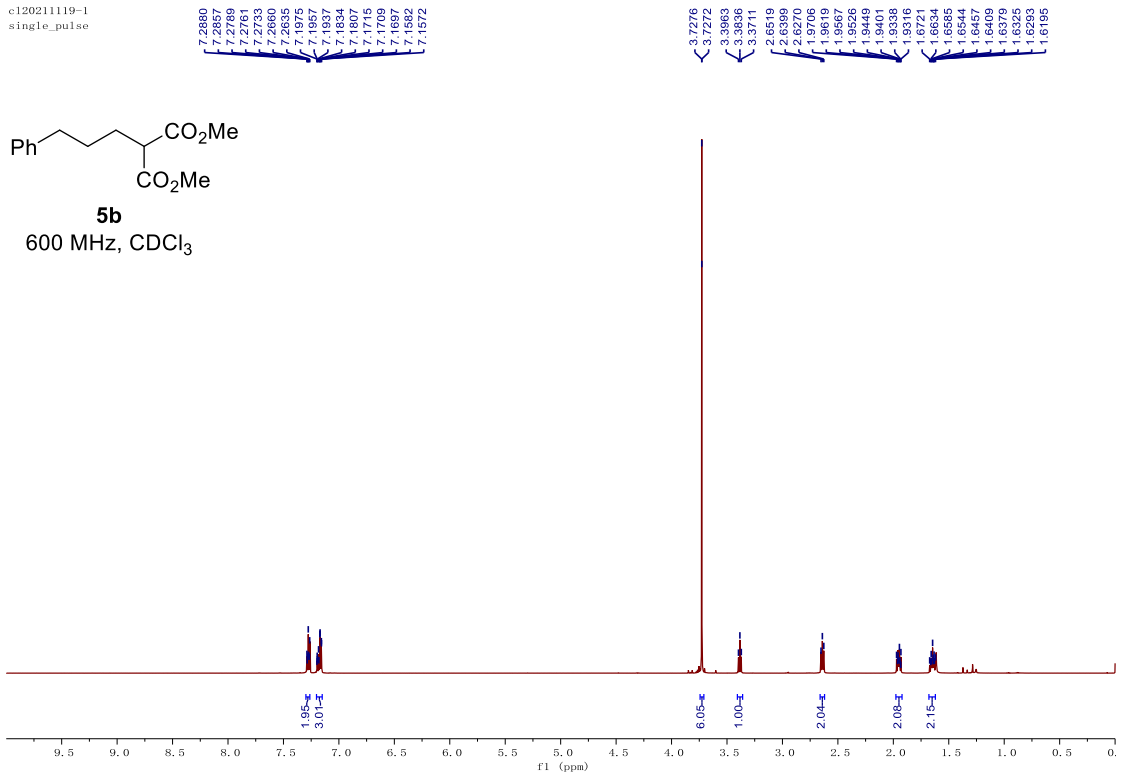

c120211119-1.1.fid

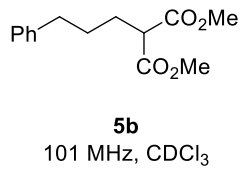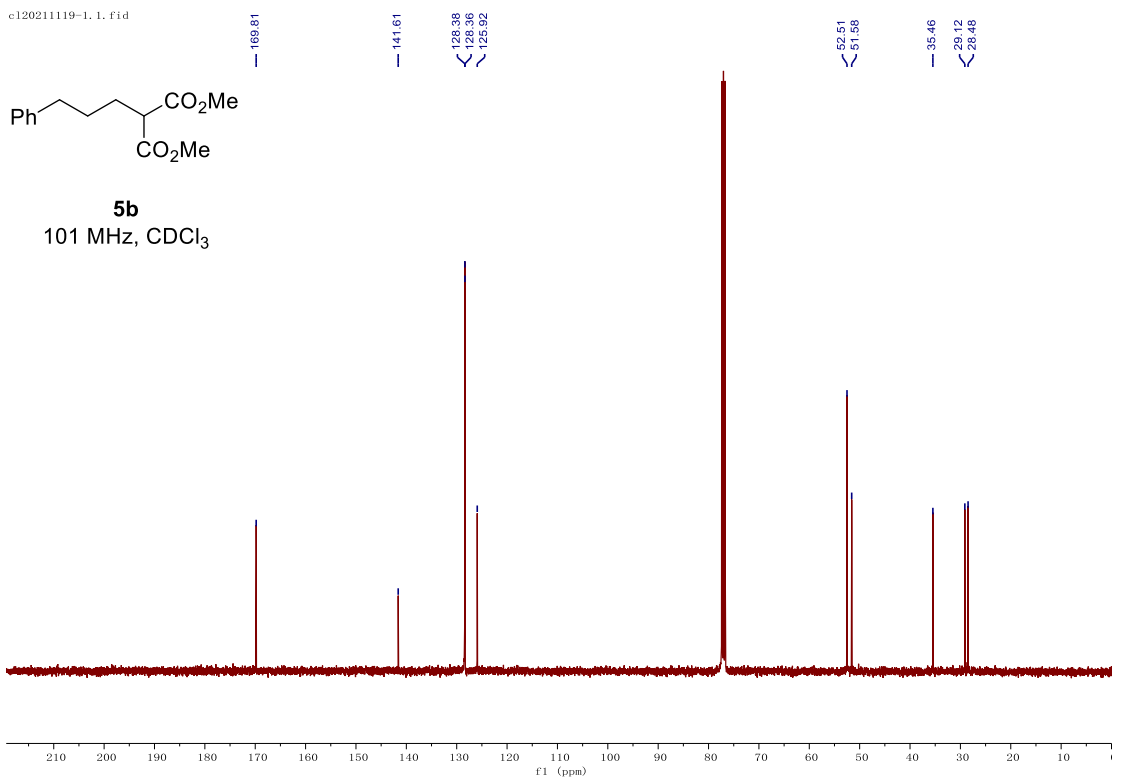

Cl-211116-1.1  
 7.7776  
 7.7741  
 7.7705  
 7.7670  
 7.7631  
 7.6394  
 7.6366  
 7.6320  
 7.6175  
 7.6021  
 7.5887  
 7.5852  
 7.5077  
 7.4987  
 7.4941  
 7.4695  
 7.2776  
 7.2689  
 7.2596  
 7.2489  
 7.2438  
 7.2314  
 7.2272  
 7.0559  
 7.0498  
 7.0366  
 7.0322  
 5.1022  
 5.0866  
 5.0709  
 5.0552  
 5.0396  
 3.6721  
 3.6536  
 3.6351  
 3.5554  
 2.4331  
 2.4152  
 2.3978  
 2.3786  
 2.3578  
 2.3388  
 2.3213  
 2.3035  
 2.2843  
 1.1885  
 1.1726  
 1.1542  
 0.9141  
 0.8954  
 0.8766

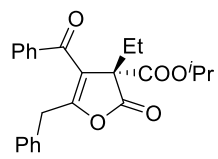

400 MHz, CDCl<sub>3</sub>

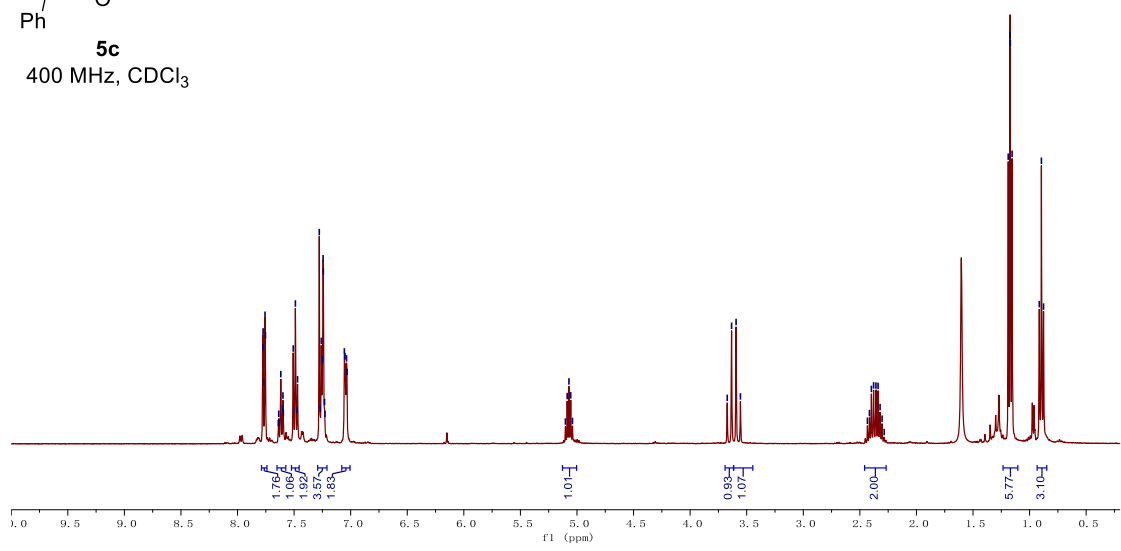

c120211116-1  
 single pulse decoupled gated NOE  
 196.24  
 172.44  
 165.95  
 162.02  
 138.66  
 134.29  
 133.25  
 128.98  
 128.84  
 128.65  
 127.38  
 119.15  
 70.37  
 62.63  
 34.52  
 25.77  
 21.46  
 9.05

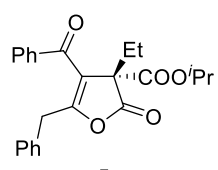

151 MHz, CDCl<sub>3</sub>

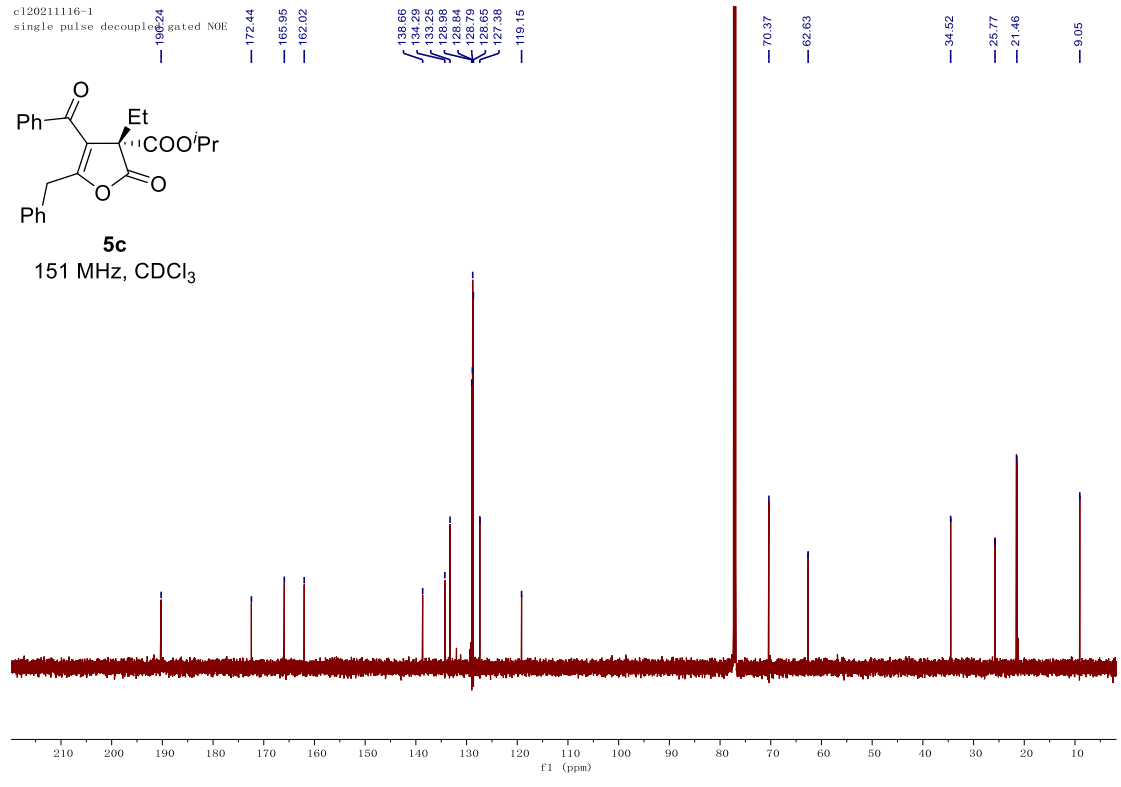

c120211128-1  
single\_pulse

7.8629  
7.8609  
7.7890  
7.6362  
7.6138  
7.6014  
7.4967  
7.4630  
7.4708  
7.3420  
7.3302  
7.2521  
7.2401  
7.0681  
7.0433

5.1609  
5.1501  
5.1397  
5.1292  
5.1187  
5.1086

3.7287  
3.7028  
3.5902  
3.5647

1.2029  
1.1898  
1.1593  
1.1493

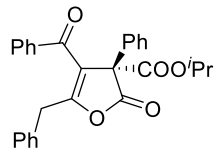

**5d**  
600 MHz, CDCl<sub>3</sub>

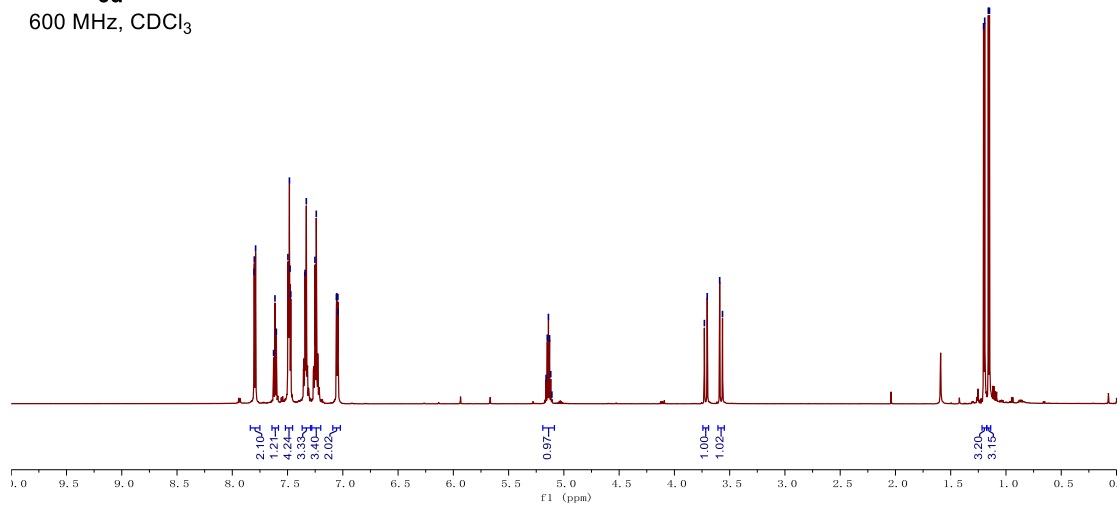

c120211128-1  
single pulse decoupled

166.777  
170.99  
165.45  
161.82

138.29  
134.11  
133.51  
133.17  
129.11  
129.04  
128.85  
128.71  
128.64  
128.36  
127.46  
120.99

70.99  
65.09

34.51  
21.49  
21.40

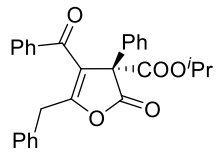

**5d**  
151 MHz, CDCl<sub>3</sub>

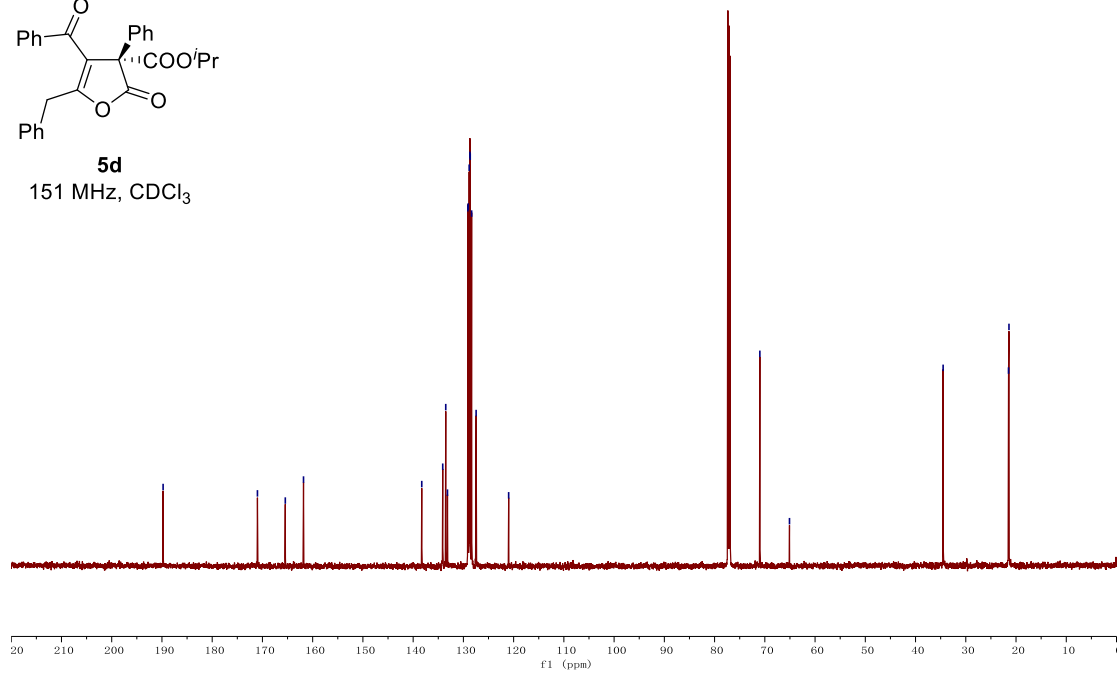

c120211201-1  
single\_pulse

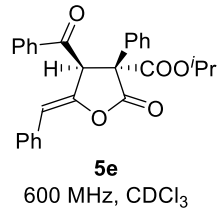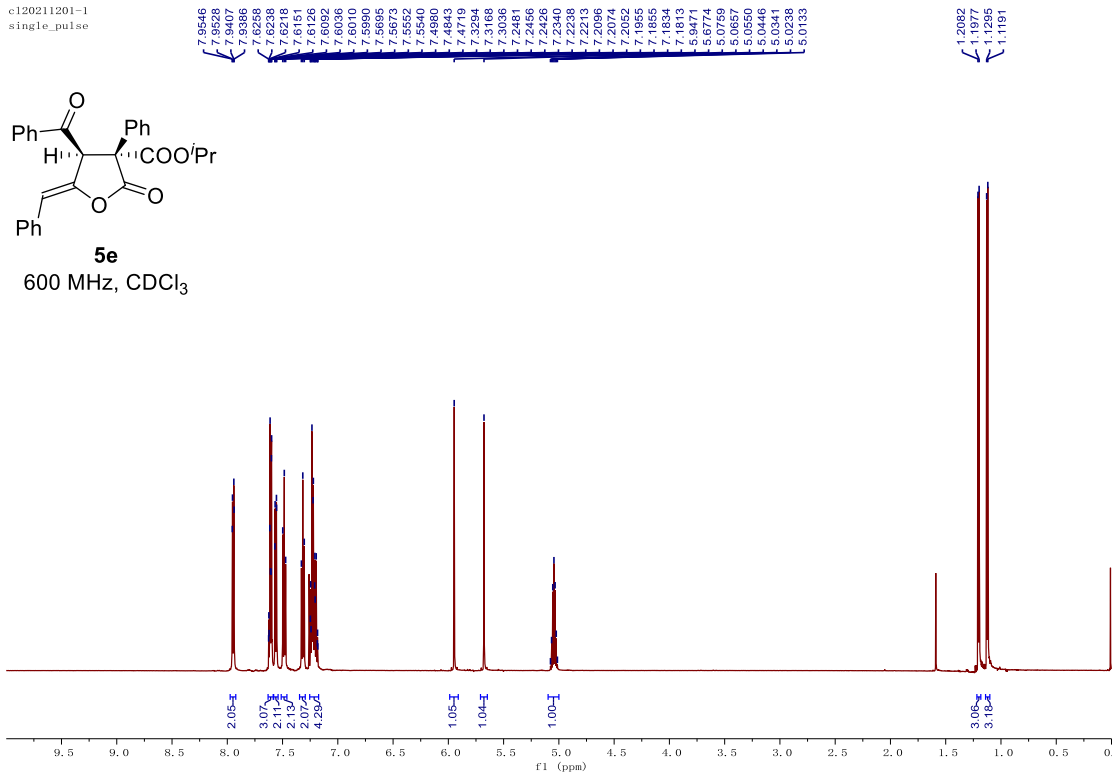

c120211201-1  
single pulse decoupled gated NOE

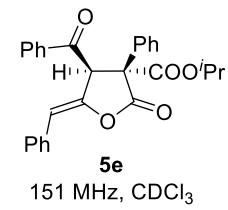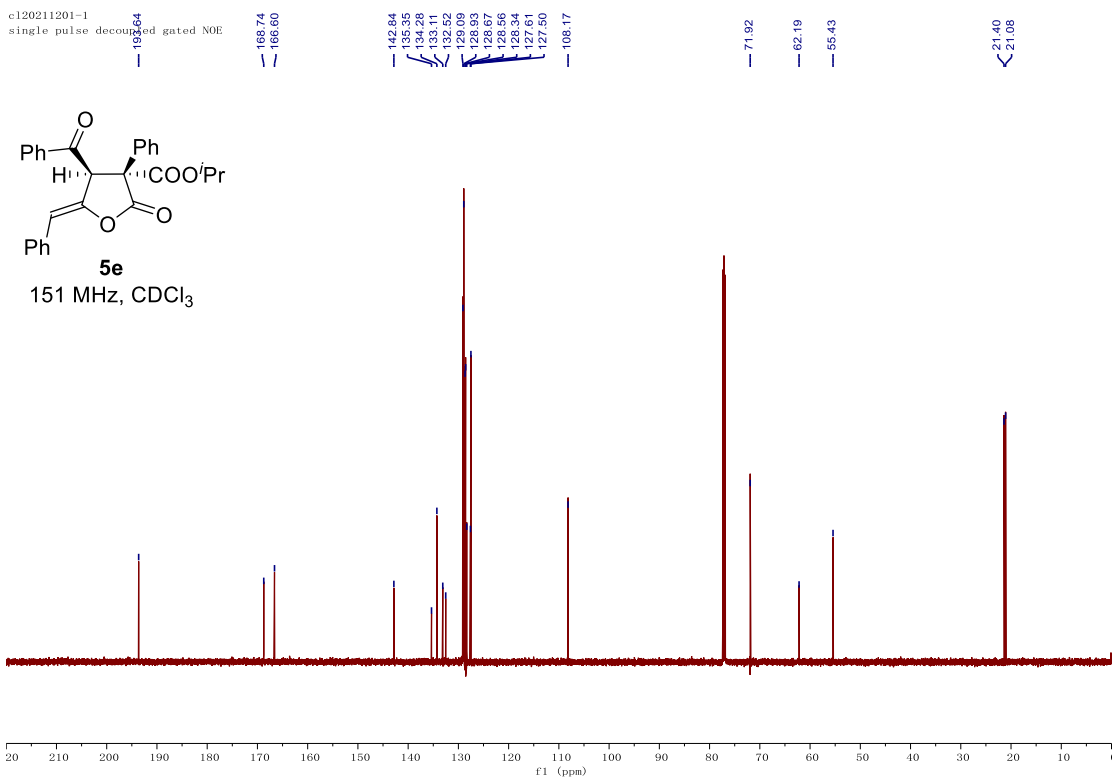

## Reference

1. Kong, X.; Song, J.; Liu, J.; Meng, M.; Yang, S.; Zeng, M.; Zhan, X.; Li, C.; Fang, X. *Chem. Comm.* **2018**, *54*, 4266–4269.
2. Zhang, Z.; Jiang, X. *Org. Lett.* **2014**, *16*, 4400–4403.
3. Chen, Z.; Yu, F.; Liu, R.; Lin, X.; Yang, S.; Liu, J.; Chen, B.; Nagaraju, S.; Zeng, M.; Ding, C.; Fang, X. *Org. Lett.* **2020**, *22*, 2381–2385.
4. Kong, X.; Yu, F.; Chen, Z.; Gong, F.; Yang, S.; Liu, J.; Luo B.; Fang, X. *Sci. China Chem.* **2021**, *64*, 991–998.
5. Guyon, C; Duclos, M; Sutter, M; Méay, E; Lemaire, M. *Org. Biomol. Chem.* **2015**, *13*, 7067-7075
